# Supplementary material for: BPO-promoted [4 + 2] cyclization of enaminones and o-phenylenediamines to 2-acyl quinoxalines via a cascade transamination and C–H amination
Source: Royal Society of Chemistry journal article supplement (doi:10.1039/d4ob00494a), 2024-01-01
Supplement: d4ob00494a1.pdf [file d4ob00494a1.pdf]

## *Supporting Information*

# **BPO-Promoted [4 + 2] cyclization of enaminones and *o*-phenylenediamines to 2-acyl quinoxalines via a cascade transamination and C–H amination**

Heng Feng,<sup>a,b†</sup> Jie Huo,<sup>b†</sup> Xiaonan Mu,<sup>a</sup> Renhua Zheng,<sup>\*b</sup> Xiao Geng,<sup>\*b</sup> and Lei Wang<sup>b,c</sup>

<sup>a</sup> Department of Chemistry, Zhejiang Sci-Tech University, Hangzhou, Zhejiang 310018, P. R. China

<sup>b</sup> Department of Chemistry, Taizhou University, Jiaojiang, Zhejiang 318000, P. R. China

<sup>c</sup> College of Material Chemistry and Chemical Engineering, Key Laboratory of Organosilicon Chemistry and Material Technology, Ministry of Education, Hangzhou Normal University, Hangzhou, 311121, Zhejiang, P. R. China

\*Corresponding authors; E-mail: zhengrh@tzc.edu.cn; xiaogeng\_@tzc.edu.cn

### *Table of Contents*

|    |                                                                                              |     |
|----|----------------------------------------------------------------------------------------------|-----|
| 1. | General considerations.....                                                                  | S2  |
| 2. | General procedures for the synthesis products.....                                           | S3  |
| 3. | Characterization data of products.....                                                       | S4  |
| 4. | Control experiments.....                                                                     | S21 |
| 5. | Crystallographic data and molecular structure of <b>3i</b> and <b>4d</b> .....               | S22 |
| 6. | <sup>1</sup> H NMR, <sup>13</sup> C NMR and <sup>19</sup> F NMR spectra of the products..... | S26 |

## 1. General considerations

All  $^1\text{H}$  NMR,  $^{13}\text{C}$  NMR and  $^{19}\text{F}$  NMR spectra were recorded on a 400 MHz Bruker FT-NMR spectrometer (400/100/376 MHz). All chemical shifts are given as  $\delta$  value (ppm) with reference to tetramethylsilane (TMS) as an internal standard. The peak patterns are indicated as follows: s, singlet; d, doublet; t, triplet; m, multiplet; q, quartet. The coupling constants,  $J$ , are reported in Hertz (Hz). High resolution mass spectroscopy data of the product were collected on an Agilent Technologies 6540 UHD Accurate-Mass Q-TOF LC/MS (ESI). Crystallographic data of product **3i**, **4d** was collected on Bruker SMART APEX II (Mo target, voltage 50 KV, current 30 mA). The chemicals and solvents were purchased from commercial suppliers either Aldrich (USA), or Shanghai Chemical Company (P. R. China). Products were purified by flash chromatography on 200–300 mesh silica gels,  $\text{SiO}_2$ .

## 2. General procedures for the synthesis of products

### 2.1 General procedure for the synthesis 3/4 (3a as example)

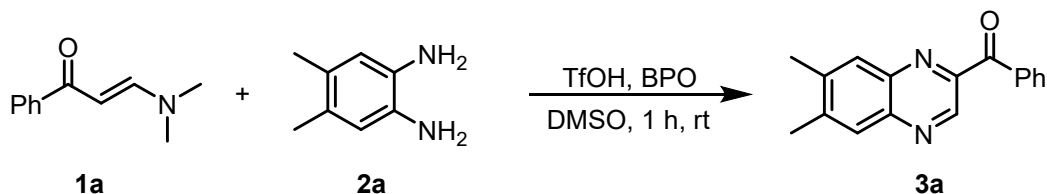

Under air atmosphere, a 15 mL pressure-resistant tubes equipped with a magnetic stir bar was charged with enaminone (**1a**, 52.6 mg, 0.30 mmol), 3,4-dimethyl-o-phenylenediamine (**2a**, 27.2 mg, 0.20 mmol), TfOH (30.0 mg, 0.20 mmol), BPO (145.3 mg, 0.60 mmol) and DMSO (2.0 mL). The reaction mixture was stirred at room temperature with stirring for 1 h. After completion of the reaction, the reaction mixture was diluted with ethyl acetate and Sodium bicarbonate saturated solution (1 mL). The resulting mixture was extracted with ethyl acetate, and the combined organic layers were washed with brine, dried over Na<sub>2</sub>SO<sub>4</sub>, filtered and concentrated. The residue was purified with silica gel chromatography (petroleum ether/ethyl acetate = 10:1, V/V) to give the product **3a** (39.4 mg, 75% yield).

### 2.2 General procedure for the synthesis 3a in 5.0 mmol scale

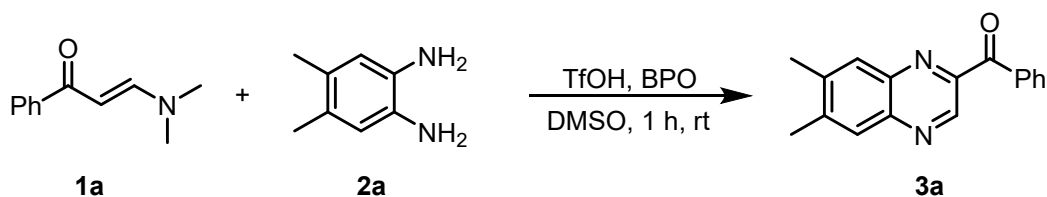

Under air atmosphere, a 50 mL round-bottom flask equipped with a magnetic stir bar was charged with enaminone (**1a**, 1.3g, 7.5 mmol), 3,4-dimethyl-o-phenylenediamine (**2a**, 681 mg, 5.0 mmol), TfOH (750 mg, 5.0 mmol), BPO (3.6 g, 15.0 mmol) and DMSO (20.0 mL). The reaction mixture was stirred at room temperature with stirring for 5 h. After completion of the reaction, the reaction mixture was diluted with ethyl acetate and Sodium bicarbonate saturated solution (10

mL). The resulting mixture was extracted with ethyl acetate, and the combined organic layers were washed with brine, dried over Na<sub>2</sub>SO<sub>4</sub>, filtered and concentrated. The residue was purified with silica gel chromatography (petroleum ether/ethyl acetate = 10:1, V/V) to give the product **3a** (865 mg, 66% yield).

### 3. Characterization data of products

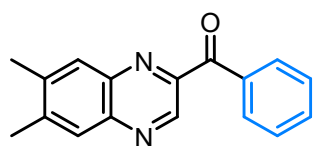

**3a**

**(6,7-Dimethylquinoxalin-2-yl)(phenyl)methanone:** 39.4 mg, 75% yield. Yellow solid, melting point: 78.0–79.0 °C (Flash column chromatography eluent, petroleum ether/ethyl acetate = 10/1, V/V).

<sup>1</sup>H NMR (400 MHz, chloroform-*d*) δ 9.38 (s, 1H), 8.23–8.20 (m, 2H), 7.91 (s, 2H), 7.66–7.61 (m, 1H), 7.54–7.50 (m, 2H), 2.53 (s, 3H), 2.50 (s, 3H).

<sup>13</sup>C NMR (100 MHz, chloroform-*d*) δ 192.5, 147.7, 144.4, 143.2, 142.1, 141.5, 139.3, 135.7, 133.35, 131.2, 129.3, 128.3, 128.2, 20.6, 20.3.

**HRMS (ESI) *m/z*:** Calcd for C<sub>17</sub>H<sub>15</sub>N<sub>2</sub>O<sup>+</sup> [M + H]<sup>+</sup>: 263.1179; found: 263.1177.

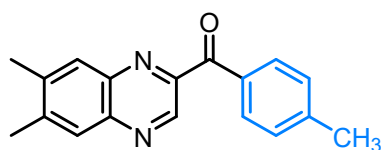

**3b**

**(6,7-Dimethylquinoxalin-2-yl)(*p*-tolyl)methanone:** 39.7 mg, 72% yield. Yellow solid, melting point: 98.8–100.2 °C (Flash column chromatography eluent, petroleum ether/ethyl acetate = 10/1, V/V).

$^1\text{H NMR}$  (400 MHz, chloroform-*d*)  $\delta$  9.35 (s, 1H), 8.12 (d,  $J$  = 8.0 Hz, 2H), 7.89 (d,  $J$  = 2.0 Hz, 2H), 7.30 (d,  $J$  = 8.0 Hz, 2H), 2.51 (s, 3H), 2.48 (s, 3H), 2.43 (s, 3H).

$^{13}\text{C NMR}$  (100 MHz, chloroform-*d*)  $\delta$  192.1, 148.0, 144.4, 144.3, 142.9, 142.0, 141.4, 139.3, 133.1, 131.3, 129.2, 129.0, 128.2, 21.7, 20.5, 20.3.

**HRMS (ESI)  $m/z$** : Calcd for  $\text{C}_{18}\text{H}_{17}\text{N}_2\text{O}^+$  [ $\text{M} + \text{H}$ ] $^+$ : 277.1335; found: 277.1333.

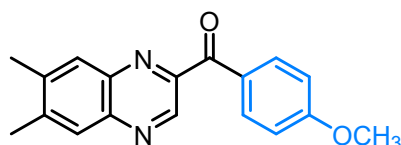

**3c**

**(6,7-Dimethylquinoxalin-2-yl)(4-methoxyphenyl)methanone**: 43.4 mg, 74% yield. Yellow solid, melting point: 136.7–138.2 °C (Flash column chromatography eluent, petroleum ether/ethyl acetate = 10/1, V/V).

$^1\text{H NMR}$  (400 MHz, chloroform-*d*)  $\delta$  9.30 (s, 1H), 8.24 (d,  $J$  = 8.8 Hz, 2H), 7.85 (d,  $J$  = 5.6 Hz, 2H), 6.95 (d,  $J$  = 8.8 Hz, 2H), 3.85 (s, 3H), 2.47 (s, 3H), 2.45 (s, 3H).

$^{13}\text{C NMR}$  (100 MHz, chloroform-*d*)  $\delta$  190.6, 163.8, 148.3, 144.4, 142.7, 141.8, 141.3, 139.1, 133.6, 129.1, 128.4, 128.2, 113.5, 55.4, 20.4, 20.2.

**HRMS (ESI)  $m/z$** : Calcd for  $\text{C}_{18}\text{H}_{17}\text{N}_2\text{O}^+$  [ $\text{M} + \text{H}$ ] $^+$ : 293.1285; found: 293.1281.

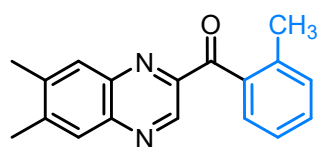

**3d**

**(6,7-Dimethylquinoxalin-2-yl)(o-tolyl)methanone**: 30.4 mg, 55% yield. Yellow solid, melting point: 96.6–98.2 °C (Flash column chromatography eluent, petroleum ether/ethyl acetate = 10/1, V/V).

$^1\text{H NMR}$  (400 MHz, chloroform-*d*)  $\delta$  9.44 (s, 1H), 7.92 (s, 1H), 7.86 (s, 1H), 7.60–7.57 (m, 1H), 7.48–7.44 (m, 1H), 7.34–7.32 (m, 1H), 7.30–7.26 (m, 1H), 2.53 (s, 3H), 2.47 (s, 3H), 2.46 (s, 3H).

$^{13}\text{C}$  NMR (100 MHz, chloroform-*d*)  $\delta$  196.3, 147.8, 144.0, 143.3, 142.2, 141.5, 139.7, 138.7, 136.3, 131.4, 131.3, 131.0, 129.4, 128.2, 125.0, 20.8, 20.6, 20.2.

HRMS (ESI) *m/z*: Calcd for  $\text{C}_{18}\text{H}_{17}\text{N}_2\text{O}^+$  [ $\text{M} + \text{H}$ ] $^+$ : 277.1335; found: 277.1333.

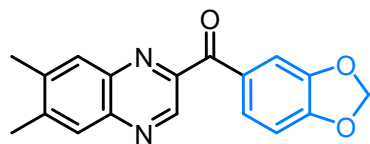

**3e**

**Benzo[*d*][1,3]dioxol-5-yl(6,7-dimethylquinoxalin-2-yl)methanone**: 35.5 mg, 58% yield. Yellow solid, melting point: 149.3–151.3 °C (Flash column chromatography eluent, petroleum ether/ethyl acetate = 10/1, V/V).

$^1\text{H}$  NMR (400 MHz, chloroform-*d*)  $\delta$  9.28 (s, 1H), 7.89–7.85 (m, 3H), 7.71–7.70 (m, 1H), 6.86 (d,  $J = 8.0$  Hz, 1H), 6.04 (s, 2H), 2.48 (s, 3H), 2.46 (s, 3H).

$^{13}\text{C}$  NMR (100 MHz, chloroform-*d*)  $\delta$  190.2, 152.2, 148.1, 147.7, 144.4, 142.9, 141.9, 141.4, 139.1, 130.1, 129.1, 128.41, 128.2, 110.5, 107.8, 101.8, 20.5, 20.2.

HRMS (ESI) *m/z*: Calcd for  $\text{C}_{18}\text{H}_{15}\text{N}_2\text{O}_3^+$  [ $\text{M} + \text{H}$ ] $^+$ : 307.1077; found: 307.1074.

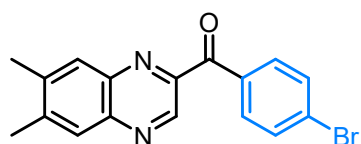

**3f**

**(4-Bromophenyl)(6,7-dimethylquinoxalin-2-yl)methanone**: 42.4 mg, 62% yield. Yellow solid, melting point: 124.5–126.2 °C (Flash column chromatography eluent, petroleum ether/ethyl acetate = 10/1, V/V).

$^1\text{H}$  NMR (400 MHz, chloroform-*d*)  $\delta$  9.36 (s, 1H), 8.10 (d,  $J = 8.8$  Hz, 2H), 7.87 (d,  $J = 5.6$  Hz, 2H), 7.62 (d,  $J = 8.8$  Hz, 2H), 2.51 (s, 3H), 2.48 (s, 3H).

$^{13}\text{C}$  NMR (100 MHz, chloroform-*d*)  $\delta$  191.2, 147.1, 144.3, 143.4, 142.1, 141.6, 139.1, 134.4, 132.7, 131.5, 129.2, 128.7, 128.3, 20.6, 20.3.

HRMS (ESI) *m/z*: Calcd for  $\text{C}_{17}\text{H}_{14}\text{BrN}_2\text{O}^+$  [ $\text{M} + \text{H}$ ] $^+$ : 341.0284; found: 341.0283.

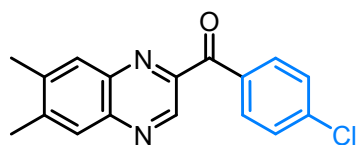

**3g**

**(4-Chlorophenyl)(6,7-dimethylquinoxalin-2-yl)methanone:** 38.6 mg, 65% yield. Yellow solid, melting point: 120.7–122.5 °C (Flash column chromatography eluent, petroleum ether/ethyl acetate = 10/1, V/V).

**<sup>1</sup>H NMR** (400 MHz, chloroform-*d*)  $\delta$  9.35 (s, 1H), 8.18 (d,  $J$  = 8.8 Hz, 2H), 7.85 (d,  $J$  = 4.8 Hz, 2H), 7.44 (d,  $J$  = 8.8 Hz, 2H), 2.49 (s, 3H), 2.47 (s, 3H).

**<sup>13</sup>C NMR** (100 MHz, chloroform-*d*)  $\delta$  190.9, 147.1, 144.3, 143.4, 142.1, 141.6, 139.8, 139.1, 134.0, 132.6, 129.1, 128.4, 128.2, 20.5, 20.2.

**HRMS (ESI)  $m/z$ :** Calcd for C<sub>17</sub>H<sub>14</sub>ClN<sub>2</sub>O<sup>+</sup> [M + H]<sup>+</sup>: 297.0789; found: 297.0787.

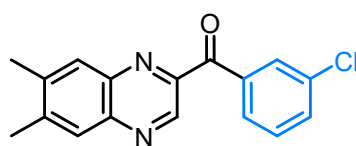

**3h**

**(3-Chlorophenyl)(6,7-dimethylquinoxalin-2-yl)methanone:** 27.4 mg, 46% yield. Yellow solid, melting point: 101.4–102.4 °C (Flash column chromatography eluent, petroleum ether/ethyl acetate = 10/1, V/V).

**<sup>1</sup>H NMR** (400 MHz, chloroform-*d*)  $\delta$  9.40 (s, 1H), 8.24–8.23 (m, 1H), 8.13–8.11 (m, 1H), 7.91 (s, 2H), 7.61–7.58 (m, 1H), 7.47–7.43 (m, 1H), 2.54 (s, 3H), 2.51 (s, 3H).

**<sup>13</sup>C NMR** (100 MHz, chloroform-*d*)  $\delta$  191.0, 147.0, 144.3, 143.6, 142.3, 141.8, 139.3, 137.3, 134.4, 133.2, 131.1, 129.5, 129.3, 129.3, 128.3, 20.6, 20.3.

**HRMS (ESI)  $m/z$ :** Calcd for C<sub>17</sub>H<sub>14</sub>ClN<sub>2</sub>O<sup>+</sup> [M + H]<sup>+</sup>: 297.0789; found: 297.0788.

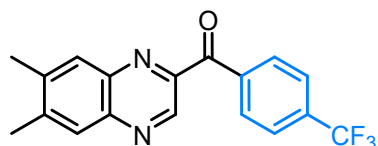

3i

**(6,7-Dimethylquinoxalin-2-yl)(4-(trifluoromethyl)phenyl)methanone:** 29.8 mg, 45% yield. Yellow solid, melting point: 106.8–108.7 °C (Flash column chromatography eluent, petroleum ether/ethyl acetate = 10/1, V/V).

**<sup>1</sup>H NMR** (400 MHz, chloroform-*d*)  $\delta$  9.42 (s, 1H), 8.32 (d,  $J = 8.0$  Hz, 2H), 7.89 (d,  $J = 9.2$  Hz, 2H), 7.76 (d,  $J = 8.0$  Hz, 2H), 2.52 (s, 3H), 2.50 (s, 3H).

**<sup>13</sup>C NMR** (100 MHz, chloroform-*d*)  $\delta$  191.4, 146.7, 144.3, 143.8, 142.3, 141.8, 139.2, 138.7, 134.22 (q,  $J = 32.6$  Hz), 131.4, 129.2, 128.3, 125.09 (q,  $J = 3.7$  Hz), 123.63 (q,  $J = 272.8$  Hz), 20.6, 20.3.

**<sup>19</sup>F NMR** (376 MHz, chloroform-*d*)  $\delta$  -63.12 (s, 3F).

**HRMS (ESI)  $m/z$ :** Calcd for C<sub>18</sub>H<sub>14</sub>F<sub>3</sub>N<sub>2</sub>O<sup>+</sup> [M + H]<sup>+</sup>: 331.1053; found: 331.1050.

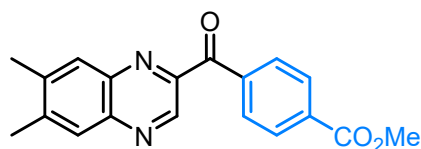

3j

**Methyl 4-(6,7-dimethylquinoxaline-2-carbonyl)benzoate:** 28.2 mg, 44% yield. Yellow solid, melting point: 149.2–151.3 °C (Flash column chromatography eluent, petroleum ether/ethyl acetate = 10/1, V/V).

**<sup>1</sup>H NMR** (400 MHz, chloroform-*d*)  $\delta$  9.41 (s, 1H), 8.26 (d,  $J = 8.4$  Hz, 2H), 8.16 (d,  $J = 8.4$  Hz, 2H), 7.89 (d,  $J = 8.0$  Hz, 2H), 3.95 (s, 3H), 2.52 (s, 3H), 2.50 (s, 3H).

**<sup>13</sup>C NMR** (100 MHz, chloroform-*d*)  $\delta$  192.0, 166.3, 147.0, 144.3, 143.6, 142.3, 141.7, 139.3, 139.3, 133.7, 131.0, 129.3, 129.3, 128.3, 52.4, 20.6, 20.3.

**HRMS (ESI)  $m/z$ :** Calcd for C<sub>19</sub>H<sub>17</sub>N<sub>2</sub>O<sub>3</sub><sup>+</sup> [M + H]<sup>+</sup>: 321.1234; found: 321.1231.



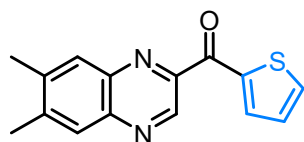

**3k**

**(6,7-Dimethylquinoxalin-2-yl)(thiophen-2-yl)methanone:** 27.4 mg, 51% yield. Yellow solid, melting point: 146.3–148.2 °C (Flash column chromatography eluent, petroleum ether/ethyl acetate = 10/1, V/V).

**<sup>1</sup>H NMR** (400 MHz, chloroform-*d*)  $\delta$  9.37 (s, 1H), 8.43–8.42 (m, 1H), 7.80 (s, 1H), 7.75–7.73 (m, 2H), 7.17–7.15 (m, 1H), 2.41 (s, 6H).

**<sup>13</sup>C NMR** (100 MHz, chloroform-*d*)  $\delta$  182.4, 146.0, 143.5, 143.3, 142.2, 141.4, 139.5, 139.0, 136.7, 136.6, 128.9, 128.2, 127.6, 20.5, 20.1.

**HRMS (ESI) *m/z*:** Calcd for C<sub>15</sub>H<sub>13</sub>N<sub>2</sub>OS<sup>+</sup> [M + H]<sup>+</sup>: 269.0743; found: 269.0741.

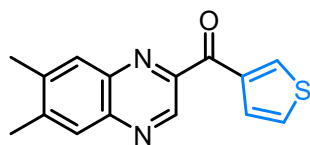

**3l**

**(6,7-Dimethylquinoxalin-2-yl)(thiophen-3-yl)methanone:** 34.4 mg, 64% yield. Yellow solid, melting point: 146.1–147.2 °C (Flash column chromatography eluent, petroleum ether/ethyl acetate = 10/1, V/V).

**<sup>1</sup>H NMR** (400 MHz, chloroform-*d*)  $\delta$  9.43 (s, 1H), 9.02–8.99 (m, 1H), 7.95–7.92 (m, 1H), 7.91 (s, 1H), 7.87 (s, 1H), 7.36 (dd, *J* = 5.2, 2.8 Hz, 1H), 2.50 (s, 3H), 2.49 (s, 3H).

**<sup>13</sup>C NMR** (100 MHz, chloroform-*d*)  $\delta$  184.6, 147.5, 144.2, 143.2, 142.2, 141.5, 139.4, 139.3, 137.4, 129.2, 129.1, 128.3, 125.3, 20.6, 20.3.

**HRMS (ESI) *m/z*:** Calcd for C<sub>15</sub>H<sub>13</sub>N<sub>2</sub>OS<sup>+</sup> [M + H]<sup>+</sup>: 269.0743; found: 269.0742.

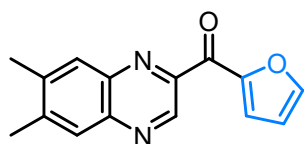

**3m**

**(6,7-Dimethylquinoxalin-2-yl)(furan-2-yl)methanone:** 31.4 mg, 62% yield. Yellow solid, melting point: 183.8–185.5 °C (Flash column chromatography eluent, petroleum ether/ethyl acetate = 10/1, V/V).

**<sup>1</sup>H NMR** (400 MHz, chloroform-*d*)  $\delta$  9.49 (s, 1H), 8.21 (d, *J* = 3.5 Hz, 1H), 7.94 (s, 1H), 7.91 (s, 1H), 7.82–7.79 (m, 1H), 6.67 (dd, *J* = 3.6, 1.6 Hz, 1H), 2.53 (s, 6H).

**<sup>13</sup>C NMR** (100 MHz, chloroform-*d*)  $\delta$  178.3, 150.8, 148.2, 146.4, 143.8, 143.5, 142.6, 141.6, 139.6, 129.2, 128.4, 124.7, 112.6, 20.6, 20.3.

**HRMS (ESI) *m/z*:** Calcd for C<sub>15</sub>H<sub>13</sub>N<sub>2</sub>O<sub>2</sub><sup>+</sup> [M + H]<sup>+</sup>: 253.0972; found: 253.0971.

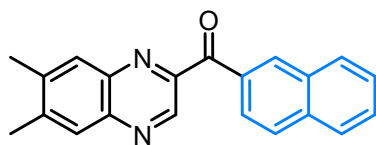

**3n**

**(6,7-Dimethylquinoxalin-2-yl)(naphthalen-2-yl)methanone:** 30.8 mg, 49% yield. Yellow solid, melting point: 117.9–120.1 °C (Flash column chromatography eluent, petroleum ether/ethyl acetate = 10/1, V/V).

**<sup>1</sup>H NMR** (400 MHz, chloroform-*d*)  $\delta$  9.42 (s, 1H), 8.80 (s, 1H), 8.26–8.20 (m, 1H), 7.96–7.90 (m, 4H), 7.88–7.84 (m, 1H), 7.62–7.56 (m, 1H), 7.54–7.49 (m, 1H), 2.51 (s, 3H), 2.48 (s, 3H).

**<sup>13</sup>C NMR** (100 MHz, chloroform-*d*)  $\delta$  192.3, 148.0, 144.4, 143.1, 142.0, 141.5, 139.3, 135.6, 134.0, 133.0, 132.2, 129.9, 129.2, 128.7, 128.3, 128.0, 127.7, 126.6, 125.9, 20.5, 20.3.

**HRMS (ESI) *m/z*:** Calcd for C<sub>21</sub>H<sub>17</sub>N<sub>2</sub>O<sup>+</sup> [M + H]<sup>+</sup>: 313.1331; found: 313.1331.

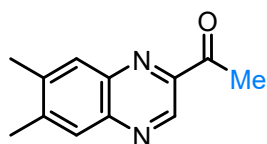

**3o**

**1-(6,7-Dimethylquinoxalin-2-yl)ethan-1-one:** 28.6 mg, 71% yield. Yellow solid, melting point: 104.9–106.3 °C (Flash column chromatography eluent, petroleum ether/ethyl acetate = 10/1, V/V).

**<sup>1</sup>H NMR** (400 MHz, chloroform-*d*)  $\delta$  9.38 (s, 1H), 7.91 (s, 1H), 7.88 (s, 1H), 2.82 (s, 3H), 2.52 (s, 3H), 2.51 (s, 3H).

**<sup>13</sup>C NMR** (100 MHz, chloroform-*d*)  $\delta$  199.9, 145.9, 143.4, 142.8, 142.2, 141.4, 140.0, 129.3, 128.4, 25.5, 20.6, 20.3.

**HRMS (ESI) *m/z*:** Calcd for C<sub>12</sub>H<sub>13</sub>N<sub>2</sub>O<sup>+</sup> [M + H]<sup>+</sup>: 201.1022; found: 201.1020.

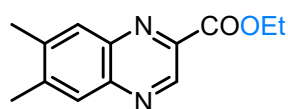

**3p**

**Ethyl 6,7-dimethylquinoxaline-2-carboxylate:** 26.8 mg, 58% yield. Brown solid, melting point: 96.1–97.8 °C (Flash column chromatography eluent, petroleum ether/ethyl acetate = 10/1, V/V).

**<sup>1</sup>H NMR** (400 MHz, chloroform-*d*)  $\delta$  9.44 (s, 1H), 8.04 (s, 1H), 7.91 (s, 1H), 4.58 (q, *J* = 7.2 Hz, 2H), 2.53 (s, 3H), 2.52 (s, 3H), 1.50 (t, *J* = 7.2 Hz, 3H).

**<sup>13</sup>C NMR** (100 MHz, chloroform-*d*)  $\delta$  164.5, 144.3, 143.6, 142.7, 141.8, 141.8, 140.5, 129.4, 128.2, 62.4, 20.6, 20.4, 14.3.

**HRMS (ESI) *m/z*:** Calcd for C<sub>13</sub>H<sub>15</sub>N<sub>2</sub>O<sub>2</sub><sup>+</sup> [M + H]<sup>+</sup>: 231.1128; found: 231.1126.

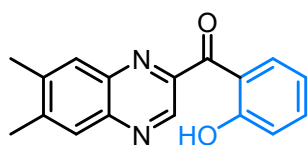

**3q**

**(6,7-Dimethylquinoxalin-2-yl)(2-hydroxyphenyl)methanone:** 34.8 mg, 63% yield. Yellow solid, melting point: 115.1–117.2 °C (Flash column chromatography eluent, petroleum ether/ethyl acetate = 10/1, V/V).

$^1\text{H NMR}$  (400 MHz, chloroform-*d*)  $\delta$  12.18 (s, 1H), 9.30 (s, 1H), 8.39–8.29 (m, 1H), 7.95 (d,  $J = 7.1$  Hz, 2H), 7.61–7.48 (m, 1H), 7.10 (d,  $J = 8.4$  Hz, 1H), 6.94 (t,  $J = 7.5$  Hz, 1H), 2.56 (s, 3H), 2.55 (s, 3H).

$^{13}\text{C NMR}$  (100 MHz, chloroform-*d*)  $\delta$  196.14, 163.99, 148.17, 144.14, 143.43, 142.08, 141.94, 139.09, 137.16, 134.34, 129.13, 128.37, 119.00, 118.81, 118.50, 20.64, 20.39.

**HRMS (ESI)  $m/z$ :** Calcd for  $\text{C}_{17}\text{H}_{15}\text{N}_2\text{O}_2^+$   $[\text{M} + \text{H}]^+$ : 279.1128; found: 279.1125.

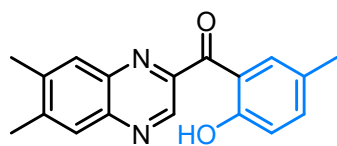

**3r**

**(6,7-Dimethylquinoxalin-2-yl)(2-hydroxy-5-methylphenyl)methanone:** 36.2 mg, 62% yield. Yellow solid, melting point: 122.2–124.7 °C (Flash column chromatography eluent, petroleum ether/ethyl acetate = 10/1, V/V).

$^1\text{H NMR}$  (400 MHz, chloroform-*d*)  $\delta$  12.00 (s, 1H), 9.26 (s, 1H), 8.03–8.00 (m, 1H), 7.96 (d,  $J = 5.6$  Hz, 2H), 7.40–7.36 (m, 1H), 7.01 (d,  $J = 8.5$  Hz, 1H), 2.57 (s, 3H), 2.55 (s, 3H), 2.29 (s, 3H).

$^{13}\text{C NMR}$  (100 MHz, chloroform-*d*)  $\delta$  196.26, 161.99, 148.45, 144.12, 143.38, 142.09, 141.99, 139.20, 138.44, 133.76, 129.14, 128.41, 128.19, 118.56, 118.35, 20.67, 20.62, 20.45.

**HRMS (ESI)  $m/z$ :** Calcd for  $\text{C}_{18}\text{H}_{17}\text{N}_2\text{O}_2^+$   $[\text{M} + \text{H}]^+$ : 293.1285; found: 293.1283.

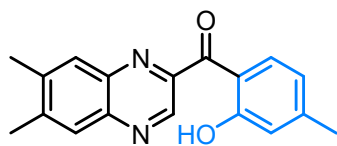

**3s**

**(6,7-Dimethylquinoxalin-2-yl)(2-hydroxy-4-methylphenyl)methanone:** 36.2 mg, 62% yield. Yellow solid, melting point: 135.8–137.3 °C (Flash column chromatography eluent, petroleum ether/ethyl acetate = 10/1, V/V).

<sup>1</sup>H NMR (400 MHz, chloroform-*d*) δ 12.23 (s, 1H), 9.28 (s, 1H), 8.20 (d, *J* = 8.3 Hz, 1H), 7.95 (d, *J* = 6.7 Hz, 2H), 6.90 (s, 1H), 6.75 (d, *J* = 8.3 Hz, 1H), 2.56 (s, 3H), 2.54 (s, 3H), 2.40 (s, 3H).

<sup>13</sup>C NMR (100 MHz, chloroform-*d*) δ 195.58, 164.31, 149.20, 148.48, 144.19, 143.30, 142.07, 141.88, 139.21, 134.16, 129.19, 128.40, 120.51, 118.54, 116.62, 22.17, 20.67, 20.44.

**HRMS (ESI) *m/z*:** Calcd for C<sub>18</sub>H<sub>17</sub>N<sub>2</sub>O<sub>2</sub><sup>+</sup> [M + H]<sup>+</sup>: 293.1285; found: 293.1284.

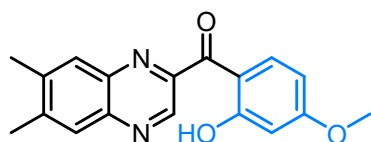

**3t**

**(6,7-Dimethylquinoxalin-2-yl)(2-hydroxy-4-methoxyphenyl)methanone:** 38.0 mg, 65% yield. Yellow solid, melting point: 147.2–149.2 °C (Flash column chromatography eluent, petroleum ether/ethyl acetate = 7/1, V/V).

<sup>1</sup>H NMR (400 MHz, chloroform-*d*) δ 12.78 (s, 1H), 9.28 (s, 1H), 8.32 (d, *J* = 9.1 Hz, 1H), 7.95 (d, *J* = 8.7 Hz, 2H), 6.54–6.53 (m, 1H), 6.51–6.48 (m, 1H), 3.89 (s, 3H), 2.56 (s, 3H), 2.54 (s, 3H).

<sup>13</sup>C NMR (100 MHz, chloroform-*d*) δ 194.02, 167.46, 166.96, 148.71, 144.27, 143.15, 141.99, 141.81, 139.22, 135.97, 129.16, 128.40, 112.95, 108.24, 100.93, 55.71, 20.66, 20.43.

**HRMS (ESI) *m/z*:** Calcd for C<sub>18</sub>H<sub>17</sub>N<sub>2</sub>O<sub>3</sub><sup>+</sup> [M + H]<sup>+</sup>: 309.1234; found: 309.1231.

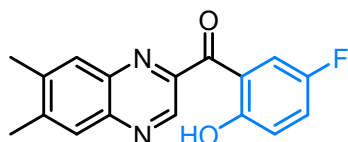

**3u**

**(6,7-Dimethylquinoxalin-2-yl)(5-fluoro-2-hydroxyphenyl)methanone:** 26.2 mg, 44% yield. Yellow solid, melting point: 138.1–139.8 °C (Flash column chromatography eluent, petroleum ether/ethyl acetate = 10/1, V/V).

**<sup>1</sup>H NMR** (400 MHz, chloroform-*d*)  $\delta$  12.06 (s, 1H), 9.36 (s, 1H), 8.30 (dd,  $J = 9.7, 3.2$  Hz, 1H), 7.97 (d,  $J = 12.4$  Hz, 2H), 7.34–7.29 (m, 1H), 7.08–7.04 (m, 1H), 2.57 (s, 3H), 2.56 (s, 3H).

**<sup>13</sup>C NMR** (100 MHz, chloroform-*d*)  $\delta$  194.7 (d,  $J = 2.2$  Hz), 160.3, 154.7 (d,  $J = 237.6$  Hz), 147.6, 144.3, 144.0, 142.3, 139.0, 129.2, 128.4, 124.9 (d,  $J = 23.9$  Hz), 119.8 (d,  $J = 7.2$  Hz), 119.1 (d,  $J = 24.8$  Hz), 118.4 (d,  $J = 7.5$  Hz), 20.7, 20.4.

**<sup>19</sup>F NMR** (376 MHz, chloroform-*d*)  $\delta$  -123.70–123.78 (m, 1F).

**HRMS (ESI)  $m/z$ :** Calcd for C<sub>17</sub>H<sub>14</sub>FN<sub>2</sub>O<sub>2</sub><sup>+</sup> [M + H]<sup>+</sup>: 297.1034; found: 297.1032.

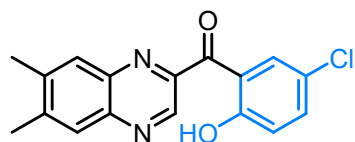

**3v**

**(5-Chloro-2-hydroxyphenyl)(6,7-dimethylquinoxalin-2-yl)methanone:** 26.8 mg, 43% yield. Yellow solid, melting point: 161.6–162.8 °C (Flash column chromatography eluent, petroleum ether/ethyl acetate = 10/1, V/V).

**<sup>1</sup>H NMR** (400 MHz, chloroform-*d*)  $\delta$  12.21 (s, 1H), 9.34 (s, 1H), 8.54–8.49 (m, 1H), 7.97 (d,  $J = 12.0$  Hz, 2H), 7.50 (dd,  $J = 8.9, 2.6$  Hz, 1H), 7.08–7.04 (m, 1H), 2.57 (s, 3H), 2.56 (s, 3H).

**<sup>13</sup>C NMR** (100 MHz, chloroform-*d*)  $\delta$  194.75, 162.44, 147.46, 144.23, 144.02, 142.32, 142.30, 138.94, 136.98, 133.35, 129.21, 128.44, 123.75, 120.18, 119.51, 20.73, 20.43.

**HRMS (ESI)  $m/z$ :** Calcd for C<sub>17</sub>H<sub>14</sub>ClN<sub>2</sub>O<sub>2</sub><sup>+</sup> [M + H]<sup>+</sup>: 313.0738; found: 313.0738.

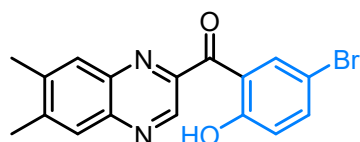

**3w**

**(5-Bromo-2-hydroxyphenyl)(6,7-dimethylquinoxalin-2-yl)methanone:** 29.2 mg, 41% yield. Yellow solid, melting point: 155.3–157.6 °C (Flash column chromatography eluent, petroleum ether/ethyl acetate = 10/1, V/V).

**<sup>1</sup>H NMR** (400 MHz, chloroform-*d*)  $\delta$  12.24 (s, 1H), 9.35 (s, 1H), 8.68–8.63 (m, 1H), 7.98 (d,  $J$  = 10.8 Hz, 2H), 7.65–7.62 (m, 1H), 7.01 (d,  $J$  = 8.9 Hz, 1H), 2.58 (s, 3H), 2.57 (s, 3H).

**<sup>13</sup>C NMR** (100 MHz, chloroform-*d*)  $\delta$  194.68, 162.85, 147.43, 144.23, 144.06, 142.34, 139.72, 138.95, 136.39, 129.21, 128.44, 120.58, 120.16, 110.70, 20.74, 20.45.

**HRMS (ESI)  $m/z$ :** Calcd for C<sub>17</sub>H<sub>14</sub>BrN<sub>2</sub>O<sub>2</sub><sup>+</sup> [M + H]<sup>+</sup>: 357.0233; found: 357.0234.

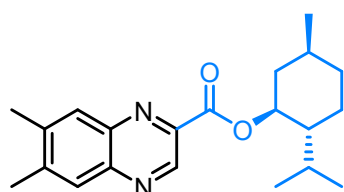

**3x**

**(1*S*,2*R*,5*S*)-2-Isopropyl-5-methylcyclohexyl 6,7-dimethylquinoxaline-2-carboxylate:** 50.6 mg, 74.3% yield. Yellow solid, melting point: 102.6–104.7 °C (Flash column chromatography eluent, petroleum ether/ethyl acetate = 10/1, V/V).

**<sup>1</sup>H NMR** (400 MHz, chloroform-*d*)  $\delta$  9.40 (s, 1H), 8.05 (s, 1H), 7.90 (s, 1H), 5.11 (td,  $J$  = 8.0, 4.0 Hz, 1H), 2.53 (s, 3H), 2.51 (s, 3H), 2.24–2.16 (m, 1H), 2.05–1.95 (m, 1H), 1.80–1.71 (m, 2H), 1.68–1.54 (m, 2H), 1.23–1.07 (m, 2H), 0.98–0.90 (m, 7H), 0.82 (d,  $J$  = 8.0 Hz, 3H).

**<sup>13</sup>C NMR** (100 MHz, chloroform-*d*)  $\delta$  163.8, 144.2, 143.4, 142.6, 142.2, 141.6, 140.8, 129.5, 128.1, 47.0, 40.7, 34.2, 31.5, 26.4, 23.5, 22.0, 20.7, 20.6, 20.4, 16.4.

**HRMS (ESI)  $m/z$ :** Calcd for C<sub>21</sub>H<sub>29</sub>N<sub>2</sub>O<sub>2</sub><sup>+</sup> [M + H]<sup>+</sup>: 341.2224; found: 341.2222.

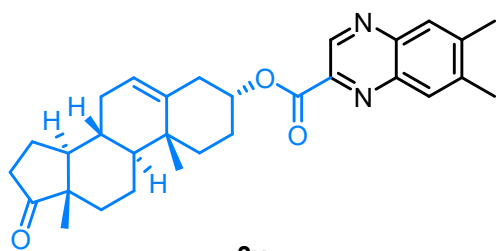

**3y**

**(3R,8R,9S,10R,13S,14S)-10,13-Dimethyl-17-oxo-2,3,4,7,8,9,10,11,12,13,14,15,16,17-tetradecahydro-1H-cyclopenta[a]phenanthren-3-yl 6,7-dimethylquinoxaline-2-carboxylate:** 38.2 mg, 40% yield. Yellow solid, melting point: 207.1–209.2 °C (Flash column chromatography eluent, petroleum ether/ethyl acetate = 10/1, V/V).

<sup>1</sup>H NMR (400 MHz, chloroform-*d*) δ 9.42 (s, 1H), 8.05 (s, 1H), 7.92 (s, 1H), 5.49 (d, *J* = 4.0 Hz, 1H), 5.12–4.95 (m, 1H), 2.65–2.57 (m, 2H), 2.54 (s, 3H), 2.53 (s, 3H), 2.50–2.44 (m, 1H), 2.16–2.08 (m, 3H), 2.01–1.95 (m, 2H), 1.90–1.85 (m, 2H), 1.73–1.68 (m, 3H), 1.58–1.50 (m, 2H), 1.37–1.24 (m, 4H), 1.12 (s, 3H), 0.91 (s, 3H).

<sup>13</sup>C NMR (100 MHz, chloroform-*d*) δ 221.2, 163.9, 144.3, 143.6, 142.7, 142.1, 141.8, 140.7, 139.7, 129.5, 128.2, 122.4, 76.0, 51.7, 50.2, 47.6, 38.0, 37.0, 36.8, 35.9, 31.5, 31.4, 30.8, 27.7, 21.9, 20.7, 20.5, 20.4, 19.5, 13.6.

**HRMS (ESI) *m/z*:** Calcd for C<sub>30</sub>H<sub>37</sub>N<sub>2</sub>O<sub>3</sub><sup>+</sup> [M + H]<sup>+</sup>: 473.2799; found: 473.2799.

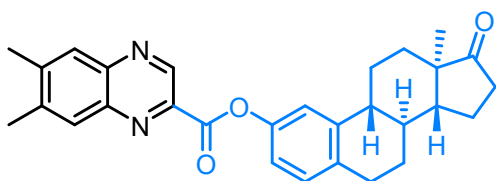

**3z**

**(8S,9R,13R,14R)-13-Methyl-17-oxo-7,8,9,11,12,13,14,15,16,17-decahydro-6H-cyclopenta[a]phenanthren-2-yl 6,7-dimethylquinoxaline-2-carboxylate:** 39.2 mg, 43% yield. Yellow solid, melting point: 199.7–201.4 °C (Flash column chromatography eluent, petroleum ether/ethyl acetate = 10/1, V/V).



**<sup>1</sup>H NMR** (400 MHz, chloroform-*d*)  $\delta$  9.56 (s, 1H), 8.09 (s, 1H), 7.96 (s, 1H), 7.40–7.34 (m, 1H), 7.11–7.06 (m, 1H), 7.05–7.03 (m, 1H), 3.00–2.94 (m, 2H), 2.57 (s, 3H), 2.55 (s, 3H), 2.53–2.40 (m, 2H), 2.38–2.29 (m, 1H), 2.23–2.13 (m, 1H), 2.13–2.08 (m, 1H), 2.02–1.88 (m, 2H), 1.68–1.50 (m, 6H), 0.94 (s, 3H).

**<sup>13</sup>C NMR** (100 MHz, chloroform-*d*)  $\delta$  220.9, 163.4, 148.6, 144.6, 144.2, 143.0, 142.2, 141.2, 140.7, 138.2, 138.0, 129.5, 128.3, 126.6, 121.6, 118.8, 50.5, 48.0, 44.2, 38.0, 35.9, 31.6, 29.5, 26.4, 25.8, 21.6, 20.8, 20.5, 13.9.

**HRMS (ESI) *m/z***: Calcd for C<sub>29</sub>H<sub>31</sub>N<sub>2</sub>O<sub>3</sub><sup>+</sup> [M + H]<sup>+</sup>: 455.2329; found: 455.2326.

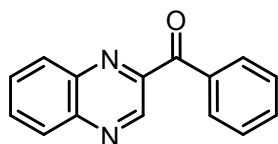

**4a**

**Phenyl(quinoxalin-2-yl)methanone**: 21.1 mg, 45% yield. Yellow solid, melting point: 63.9–65.2 °C (Flash column chromatography eluent, petroleum ether/ethyl acetate = 10/1, V/V).

**<sup>1</sup>H NMR** (400 MHz, chloroform-*d*)  $\delta$  9.49 (s, 1H), 8.26–8.18 (m, 4H), 7.93–7.83 (m, 2H), 7.69–7.63 (m, 1H), 7.57–7.51 (m, 2H).

**<sup>13</sup>C NMR** (100 MHz, chloroform-*d*)  $\delta$  192.3, 148.6, 145.3, 143.1, 140.4, 135.4, 133.6, 132.0, 131.2, 130.8, 130.4, 129.4, 128.4.

**HRMS (ESI) *m/z***: Calcd for C<sub>15</sub>H<sub>11</sub>N<sub>2</sub>O<sup>+</sup> [M + H]<sup>+</sup>: 235.0866; found: 235.0864.

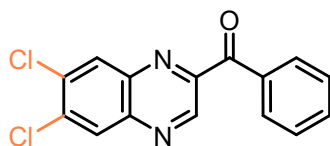

**4b**

**(6,7-Dichloroquinoxalin-2-yl)(phenyl)methanone**: 48.0 mg, 79% yield. Yellow solid, melting point: 151.1–153.8 °C (Flash column chromatography eluent, petroleum ether/ethyl acetate = 10/1, V/V).

$^1\text{H NMR}$  (400 MHz, chloroform-*d*)  $\delta$  9.45 (s, 1H), 8.30 (d,  $J = 2.8$  Hz, 2H), 8.21–8.17 (m, 2H), 7.69–7.64 (m, 1H), 7.56–7.51 (m, 2H).

$^{13}\text{C NMR}$  (100 MHz, chloroform-*d*)  $\delta$  191.5, 149.1, 146.3, 141.7, 139.0, 136.8, 135.7, 135.0, 133.8, 131.1, 130.7, 130.0, 128.4.

**HRMS (ESI)  $m/z$ :** Calcd for  $\text{C}_{15}\text{H}_9\text{Cl}_2\text{N}_2\text{O}^+$  [ $\text{M} + \text{H}$ ] $^+$ : 303.0086; found: 303.0084.

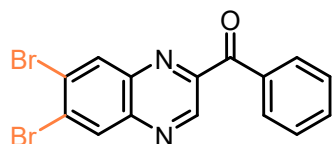

**4c**

**(6,7-Dibromoquinoxalin-2-yl)(phenyl)methanone:** 41.6 mg, 53% yield. Yellow solid, melting point: 165.6–167.5 °C (Flash column chromatography eluent, petroleum ether/ethyl acetate = 10/1, V/V).

$^1\text{H NMR}$  (400 MHz, chloroform-*d*)  $\delta$  9.47 (s, 1H), 8.51 (s, 2H), 8.22–8.18 (m, 2H), 7.70–7.64 (m, 1H), 7.57–7.51 (m, 2H).

$^{13}\text{C NMR}$  (100 MHz, chloroform-*d*)  $\delta$  191.6, 149.2, 146.4, 142.1, 139.5, 135.0, 134.2, 133.9, 133.4, 131.1, 129.2, 128.4, 127.8.

**HRMS (ESI)  $m/z$ :** Calcd for  $\text{C}_{15}\text{H}_9\text{Br}_2\text{N}_2\text{O}^+$  [ $\text{M} + \text{H}$ ] $^+$ : 390.9076; found: 390.9076.

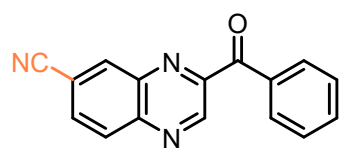

**4d**

**3-Benzoylquinoxaline-6-carbonitrile:** 41.6 mg, 80% yield. Yellow solid, melting point: 99.8–101.5 °C (Flash column chromatography eluent, petroleum ether/ethyl acetate = 10/1, V/V).

$^1\text{H NMR}$  (400 MHz, chloroform-*d*)  $\delta$  9.55 (s, 1H), 8.59–8.54 (m, 1H), 8.32–8.27 (m, 1H), 8.21–8.17 (m, 2H), 8.04–7.99 (m, 1H), 7.70–7.64 (m, 1H), 7.55–7.50 (m, 2H).

$^{13}\text{C}$  NMR (100 MHz, chloroform-*d*)  $\delta$  191.2, 149.9, 147.7, 144.2, 139.3, 136.1, 134.8, 134.0, 132.4, 131.1, 131.0, 128.4, 117.4, 114.4.

HRMS (ESI) *m/z*: Calcd for  $\text{C}_{16}\text{H}_{10}\text{N}_3\text{O}^+$  [ $\text{M} + \text{H}$ ] $^+$ : 260.0818; found: 260.0817.

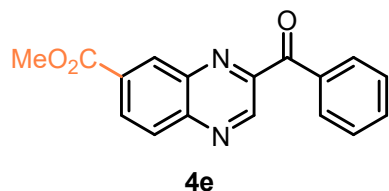

**Methyl 3-benzoylquinoxaline-6-carboxylate:** 48.2 mg, 82% yield. Yellow solid, melting point: 119.9–121.3 °C (Flash column chromatography eluent, petroleum ether/ethyl acetate = 10/1, V/V).

$^1\text{H}$  NMR (400 MHz, chloroform-*d*)  $\delta$  9.51 (s, 1H), 8.85 (s, 1H), 8.45–8.40 (m, 1H), 8.24–8.18 (m, 3H), 7.67–7.61 (m, 1H), 7.54–7.49 (m, 2H), 3.99 (s, 3H).

$^{13}\text{C}$  NMR (100 MHz, chloroform-*d*)  $\delta$  191.6, 165.7, 149.2, 146.9, 144.8, 139.5, 135.1, 133.7, 132.9, 132.1, 131.3, 131.2, 129.6, 128.3, 52.7.

HRMS (ESI) *m/z*: Calcd for  $\text{C}_{17}\text{H}_{13}\text{N}_2\text{O}_3^+$  [ $\text{M} + \text{H}$ ] $^+$ : 293.0921; found: 293.0921.

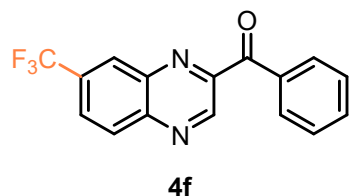

**Phenyl(7-(trifluoromethyl)quinoxalin-2-yl)methanone:** 41.6 mg, 69% yield. Yellow solid, melting point: 60.6–62.1 °C (Flash column chromatography eluent, petroleum ether/ethyl acetate = 10/1, V/V).

$^1\text{H}$  NMR (400 MHz, chloroform-*d*)  $\delta$  9.57 (s, 1H), 8.52 (s, 1H), 8.36–8.30 (m, 1H), 8.26–8.20 (m, 2H), 8.09–8.03 (m, 1H), 7.71–7.64 (m, 1H), 7.58–7.52 (m, 2H).

$^{13}\text{C}$  NMR (100 MHz, chloroform-*d*)  $\delta$  191.6, 149.6, 147.2, 144.1, 139.4, 135.0, 133.9, 132.5 (q,  $J = 33.5$  Hz), 131.5, 130.7, 128.5, 128.3 (q,  $J = 4.4$  Hz), 127.5 (q,  $J = 2.8$  Hz), 123.3 (q,  $J = 272.9$  Hz).

$^{19}\text{F}$  NMR (376 MHz, chloroform-*d*)  $\delta$  -62.76 (s, 3F).

**HRMS (ESI)  $m/z$ :** Calcd for  $C_{16}H_{10}F_3N_2O^+$   $[M + H]^+$ : 303.0740; found: 303.0736.

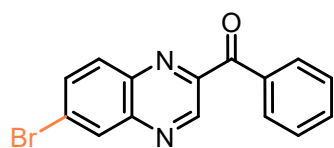

**4g**

**(6-Bromoquinoxalin-2-yl)(phenyl)methanone:** 30.8 mg, 49% yield. Orange solid, melting point: 100.8–102.5 °C (Flash column chromatography eluent, petroleum ether/ethyl acetate = 30/1, V/V).

**$^1H$  NMR** (400 MHz, chloroform-*d*)  $\delta$  9.49 (s, 1H), 8.40 (d,  $J = 2.0$  Hz, 1H), 8.24–8.21 (m, 2H), 8.10–8.06 (m, 1H), 8.00–7.96 (m, 1H), 7.68 (t,  $J = 7.4$  Hz, 1H), 7.55 (t,  $J = 7.7$  Hz, 2H).

**$^{13}C$  NMR** (101 MHz, chloroform-*d*)  $\delta$  192.0, 149.2, 145.6, 142.0, 141.0, 135.6, 135.3, 133.9, 132.6, 131.2, 130.7, 128.5, 125.0.

**HRMS (ESI)  $m/z$ :** Calcd for  $C_{15}H_{10}BrN_2O^+$   $[M + H]^+$ : 312.9971; found: 312.9969.

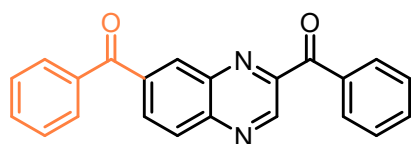

**4h**

**Quinoxaline-2,7-diylbis(phenyl)methanone:** 50.7 mg, 75% yield. Yellow solid, melting point: 144.5–146.2 °C (Flash column chromatography eluent, petroleum ether/ethyl acetate = 10/1, V/V).

**$^1H$  NMR** (400 MHz, chloroform-*d*)  $\delta$  9.54 (s, 1H), 8.54 (s, 1H), 8.35–8.28 (m, 2H), 8.23–8.18 (m, 2H), 7.89–7.84 (m, 2H), 7.66–7.60 (m, 2H), 7.53–7.48 (m, 4H).

**$^{13}C$  NMR** (100 MHz, chloroform-*d*)  $\delta$  195.1, 191.7, 149.4, 146.9, 144.6, 139.5, 139.3, 136.6, 135.1, 133.8, 133.1, 132.9, 131.8, 131.1, 130.1, 129.8, 128.5, 128.4.

**HRMS (ESI)  $m/z$ :** Calcd for  $C_{22}H_{15}N_2O_2^+$   $[M + H]^+$ : 339.1128; found: 339.1125.

## 4. Control experiments

When a radical scavenger BHT (2,6-di-*tert*-butyl-4-methylphenol) in 2.0 equiv. was added to the model reaction, the significantly lower product yield of **3a** was observed, demonstrating a possible radical pathway in this transformation. Meanwhile, a BHT-adduct (**A'**) of the carbon-centered radical intermediate **A** was detected by HRMS analysis (Figure S1).

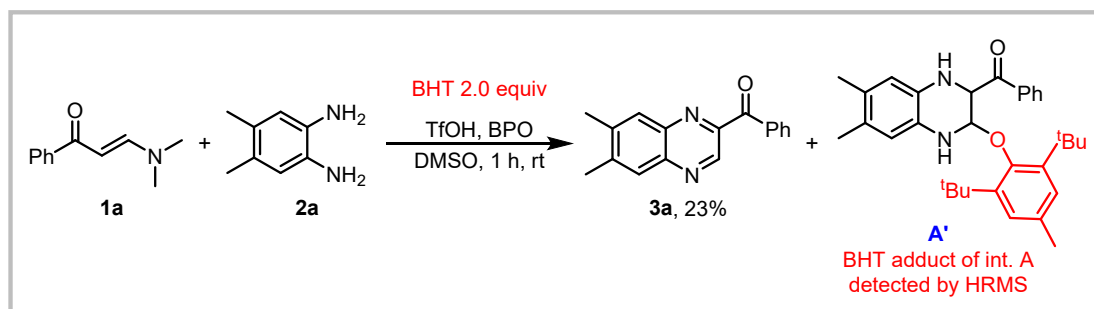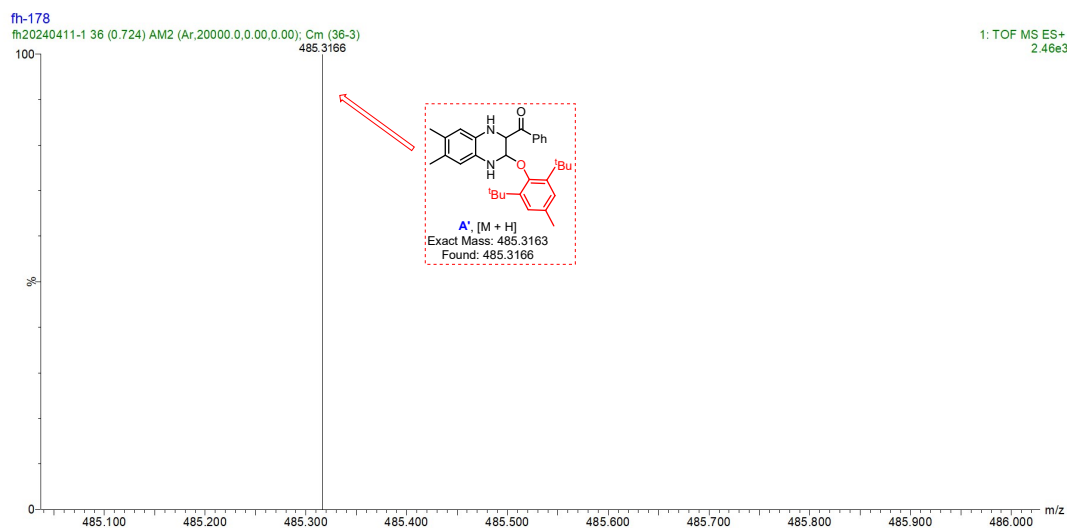

Figure S1 HRMS analysis of a BHT-adduct (**A'**).

## 5. Crystallographic data and molecular structure of **3i** and **4d**

(CCDC: 2342561, 2342561)

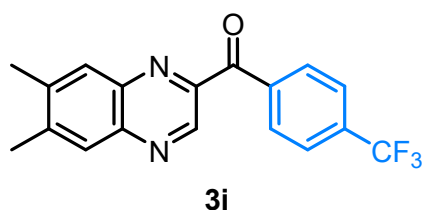

General procedure for crystal culture of **3i**: To a test tube (15 mL) with added **3a** (20 mg), dichloromethane (1.0 mL) was added slowly to make it dissolve completely. After it dissolved, a mixture of petroleum ether (2.0 mL) and EtOAc (3.0 mL) was added. Then, the test tube was sealed with a rubber stopper, and connected to air with a syringe needle. Finally, the tube was put in a dry and ventilated place to make the organic solvent to volatilize slowly. After a few days, the crystal of **3i** was obtained. The X-ray crystal structure of **3i** was shown in Figure S2.

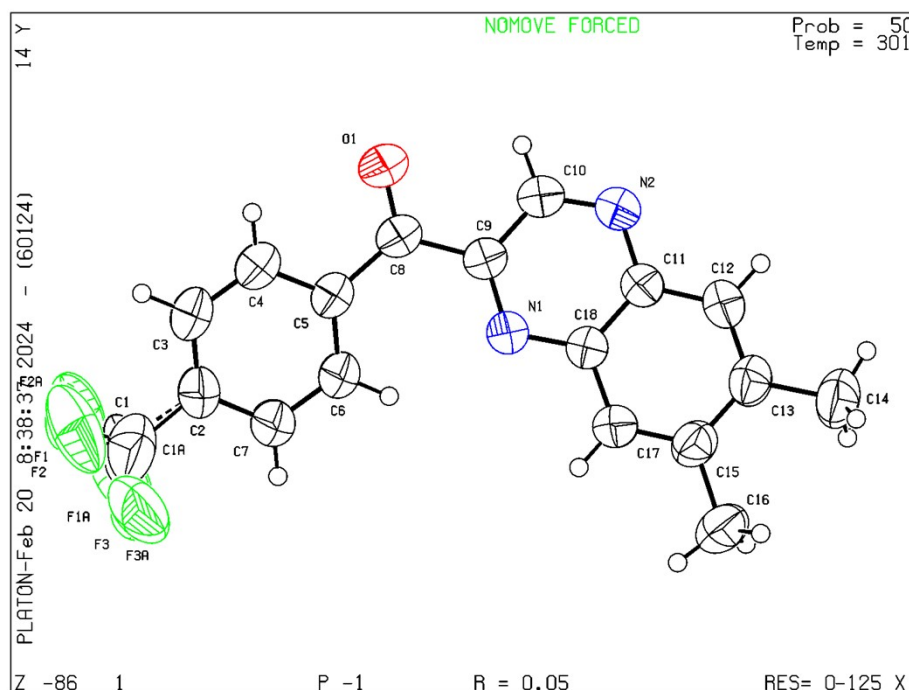

**Figure S2** ORTEP diagram of **3i** with thermal displacement parameters drawn at 30% probability.

### Datablock: 1

---

|                              |                  |                     |                  |
|------------------------------|------------------|---------------------|------------------|
| Bond precision:              | C-C = 0.0024 Å   | Wavelength=1.54178  |                  |
| Cell:                        | a=7.2674 (4)     | b=9.6649 (6)        | c=11.5209 (7)    |
|                              | alpha=93.372 (3) | beta=95.007 (3)     | gamma=97.994 (3) |
| Temperature:                 | 301 K            |                     |                  |
|                              | Calculated       | Reported            |                  |
| Volume                       | 796.22 (8)       | 796.22 (8)          |                  |
| Space group                  | P -1             | P -1                |                  |
| Hall group                   | -P 1             | -P 1                |                  |
| Moiety formula               | C18 H13 F3 N2 O  | ?                   |                  |
| Sum formula                  | C18 H13 F3 N2 O  | C18 H13 F3 N2 O     |                  |
| Mr                           | 330.30           | 330.30              |                  |
| Dx, g cm <sup>-3</sup>       | 1.378            | 1.378               |                  |
| Z                            | 2                | 2                   |                  |
| Mu (mm <sup>-1</sup> )       | 0.947            | 0.947               |                  |
| F000                         | 340.0            | 340.0               |                  |
| F000'                        | 341.25           |                     |                  |
| h, k, lmax                   | 8, 11, 13        | 8, 11, 13           |                  |
| Nref                         | 2934             | 2920                |                  |
| Tmin, Tmax                   | 0.782, 0.812     |                     |                  |
| Tmin'                        | 0.782            |                     |                  |
| Correction method= Not given |                  |                     |                  |
| Data completeness=           | 0.995            | Theta (max)= 68.383 |                  |
| R(reflections)=              | 0.0532 ( 2254)   | wR2 (reflections)=  |                  |
|                              |                  | 0.1664 ( 2920)      |                  |
| S =                          | 1.088            | Npar= 257           |                  |

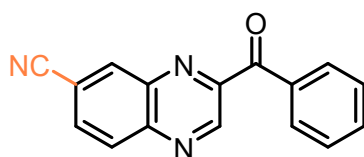

**4d**

General procedure for crystal culture of **4d**: To a test tube (15 mL) with added **4d** (20 mg), dichloromethane (1.0 mL) was added slowly to make it dissolve completely. After it dissolved, a mixture of petroleum ether (2.0 mL) and EtOAc (3.0 mL) was added. Then, the test tube was sealed with a rubber stopper, and connected

to air with a syringe needle. Finally, the tube was put in a dry and ventilated place to make the organic solvent to volatilize slowly. After a few days, the crystal of **4d** was obtained. The X-ray crystal structure of **4d** was shown in Figure S3.

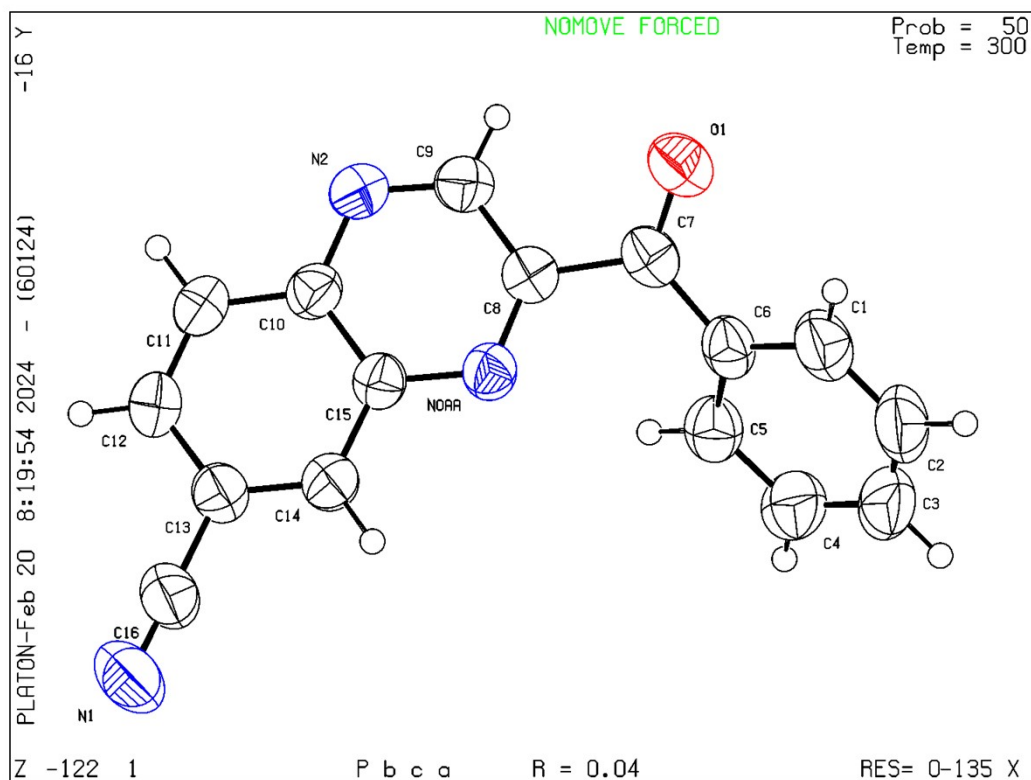

**Figure S3** ORTEP diagram of **4d** with thermal displacement parameters drawn at 30% probability.



## Datablock: 1

---

Bond precision: C-C = 0.0019 Å

Wavelength=1.54178

Cell: a=12.5878 (4)  
alpha=90

b=9.5702 (3)  
beta=90

c=21.3754 (6)  
gamma=90

Temperature: 300 K

|                        | Calculated   | Reported     |
|------------------------|--------------|--------------|
| Volume                 | 2575.05 (14) | 2575.05 (14) |
| Space group            | P b c a      | P b c a      |
| Hall group             | -P 2ac 2ab   | -P 2ac 2ab   |
| Moiety formula         | C16 H9 N3 O  | ?            |
| Sum formula            | C16 H9 N3 O  | C16 H9 N3 O  |
| Mr                     | 259.26       | 259.26       |
| Dx, g cm <sup>-3</sup> | 1.337        | 1.337        |
| Z                      | 8            | 8            |
| Mu (mm <sup>-1</sup> ) | 0.704        | 0.704        |
| F000                   | 1072.0       | 1072.0       |
| F000'                  | 1075.22      |              |
| h, k, lmax             | 15, 11, 25   | 15, 11, 25   |
| Nref                   | 2351         | 2340         |
| Tmin, Tmax             | 0.845, 0.869 |              |
| Tmin'                  | 0.845        |              |

Correction method= Not given

Data completeness= 0.995

Theta(max)= 68.293

R(reflections)= 0.0350 ( 2080)

wR2(reflections)=  
0.1004 ( 2340)

S = 1.069

Npar= 181

## 6. $^1\text{H}$ NMR, $^{13}\text{C}$ NMR and $^{19}\text{F}$ NMR spectra of the products

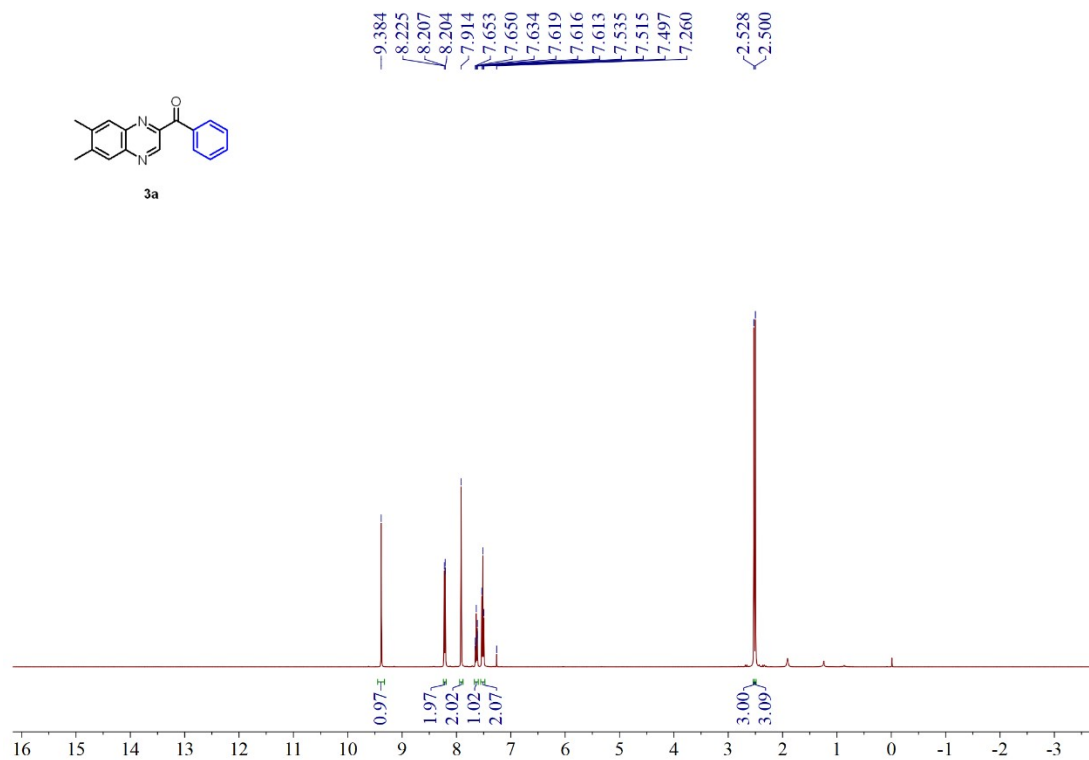

$^1\text{H}$  NMR Spectrum of Compound **3a** (400 MHz,  $\text{CDCl}_3$ )

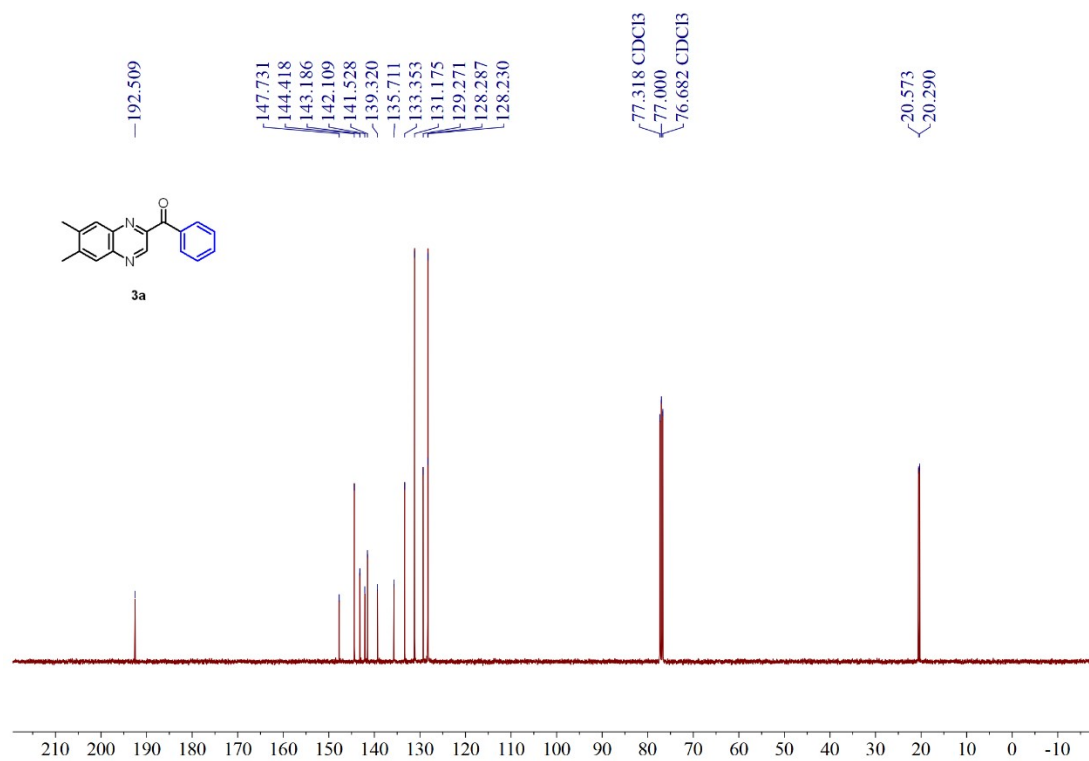

$^{13}\text{C}\{^1\text{H}\}$  NMR Spectrum of Compound **3a** (100 MHz,  $\text{CDCl}_3$ )

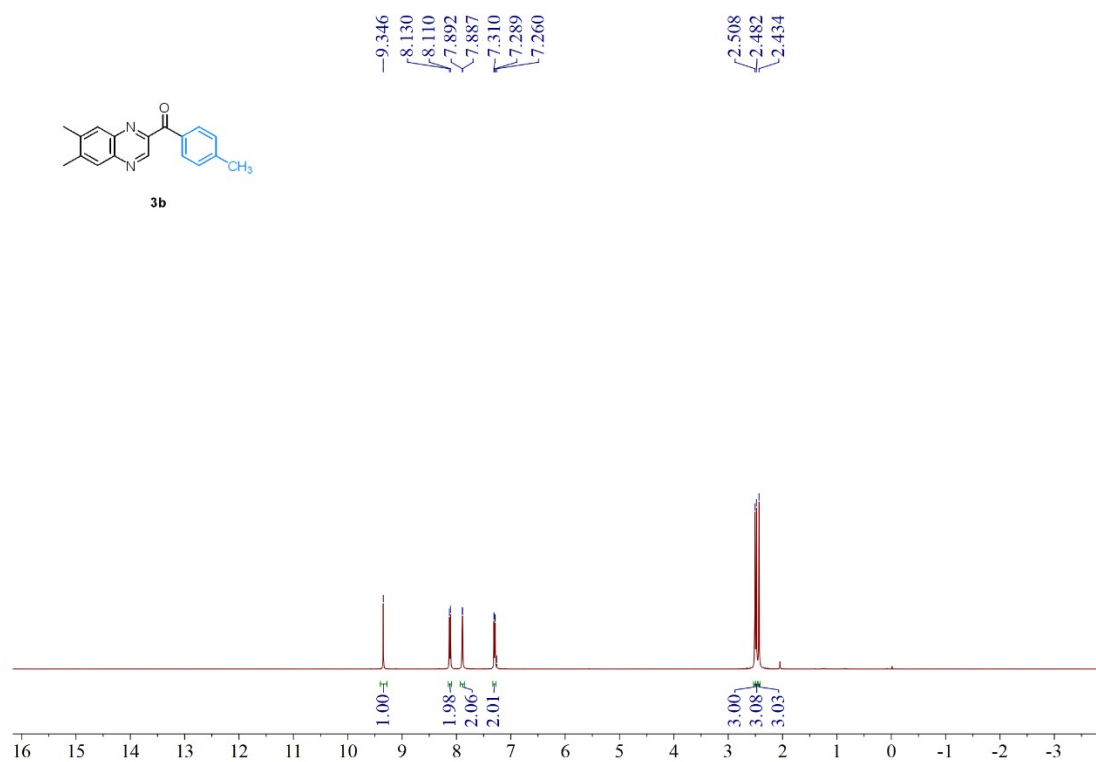

$^1\text{H}$  NMR Spectrum of Compound **3b** (400 MHz,  $\text{CDCl}_3$ )

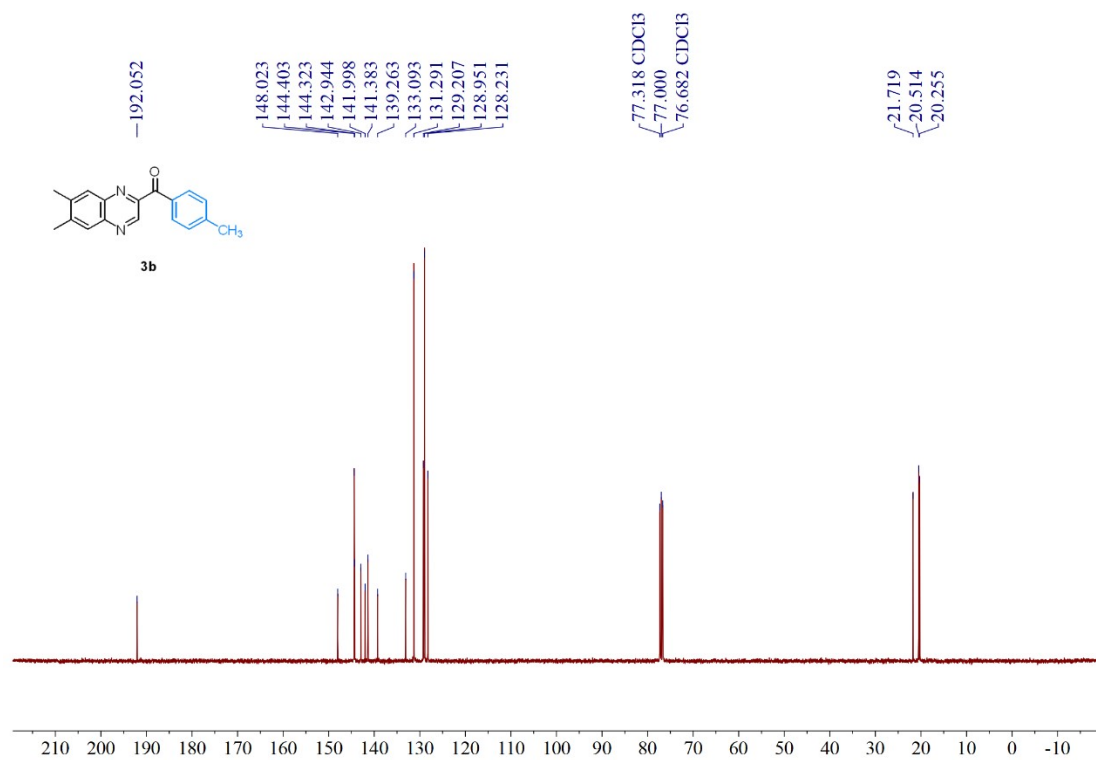

$^{13}\text{C}\{^1\text{H}\}$  NMR Spectrum of Compound **3b** (100 MHz,  $\text{CDCl}_3$ )

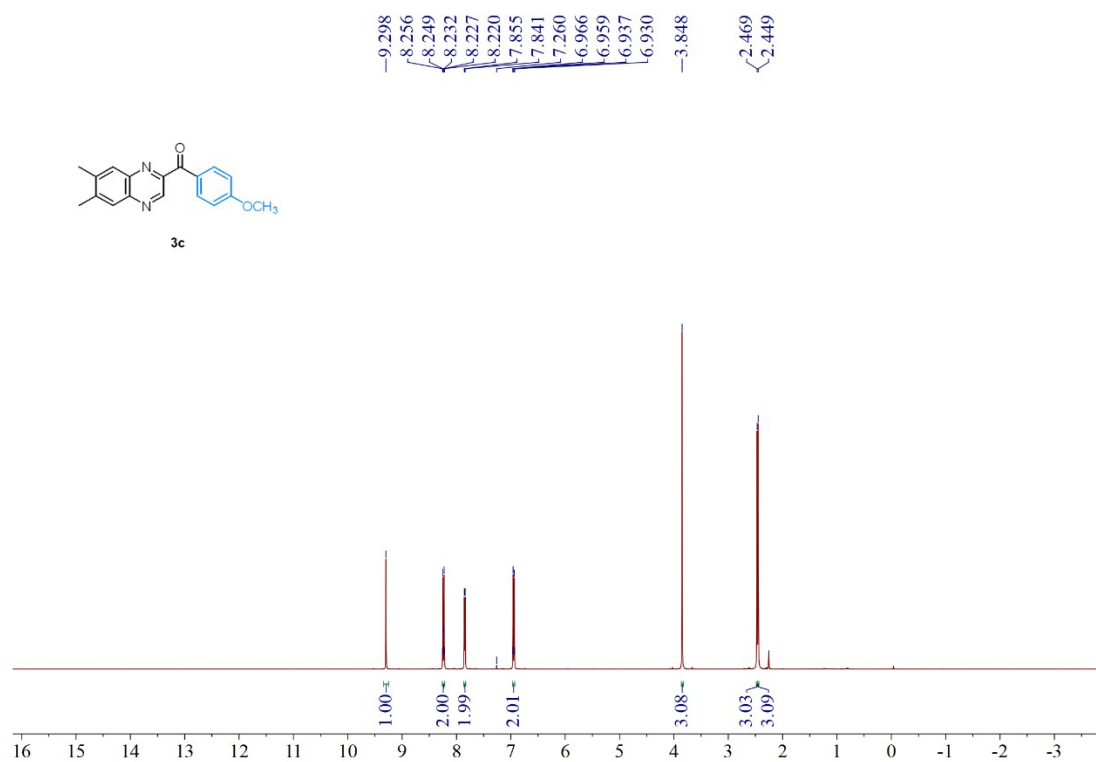

<sup>1</sup>H NMR Spectrum of Compound **3c** (400 MHz, CDCl<sub>3</sub>)

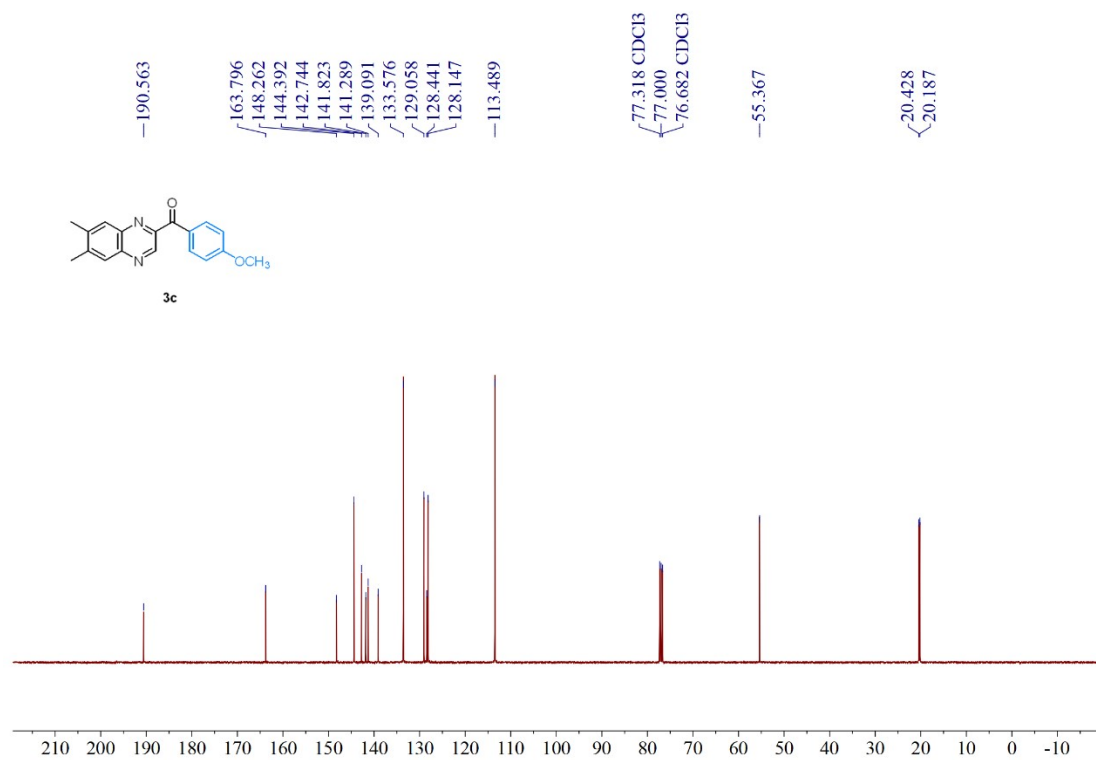

<sup>13</sup>C {<sup>1</sup>H} NMR Spectrum of Compound **3c** (100 MHz, CDCl<sub>3</sub>)

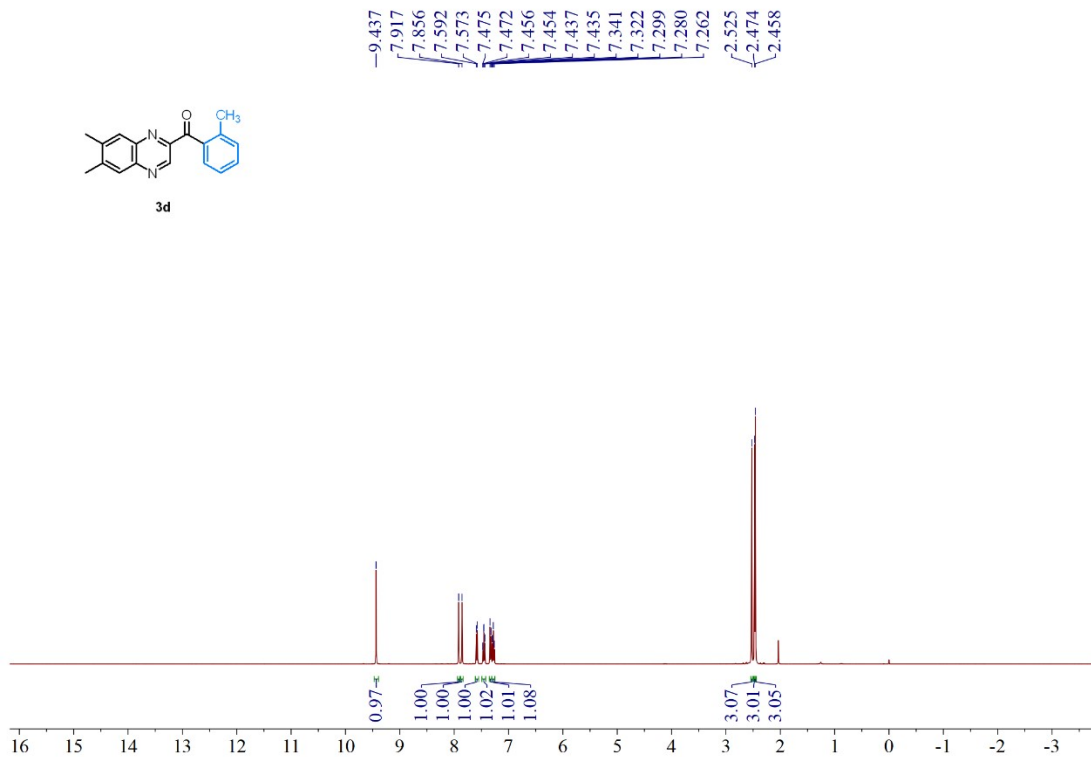

<sup>1</sup>H NMR Spectrum of Compound **3d** (400 MHz, CDCl<sub>3</sub>)

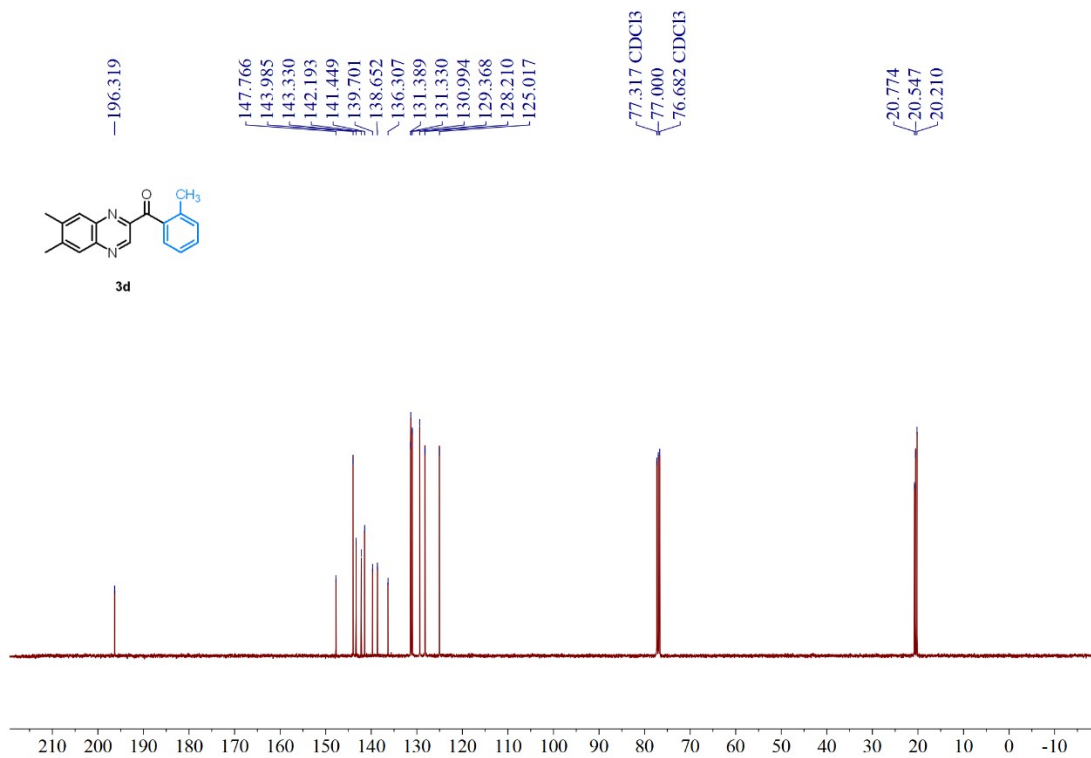

<sup>13</sup>C {<sup>1</sup>H} NMR Spectrum of Compound **3d** (100 MHz, CDCl<sub>3</sub>)

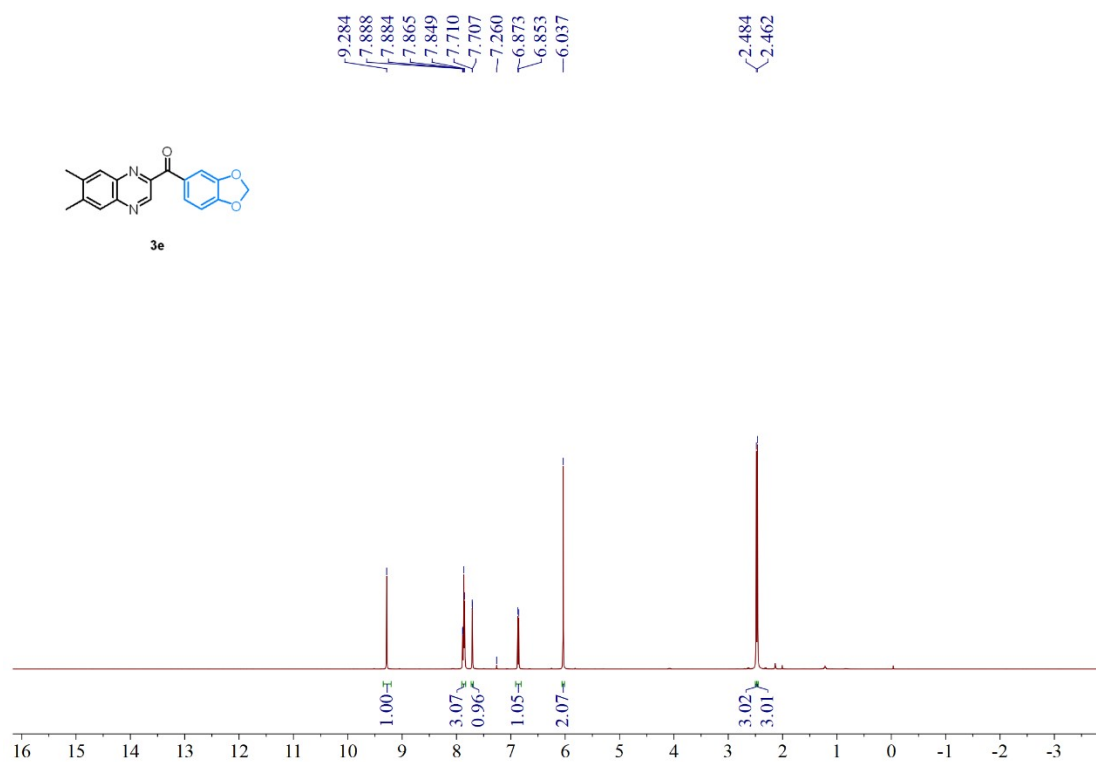

$^1\text{H}$  NMR Spectrum of Compound **3e** (400 MHz,  $\text{CDCl}_3$ )

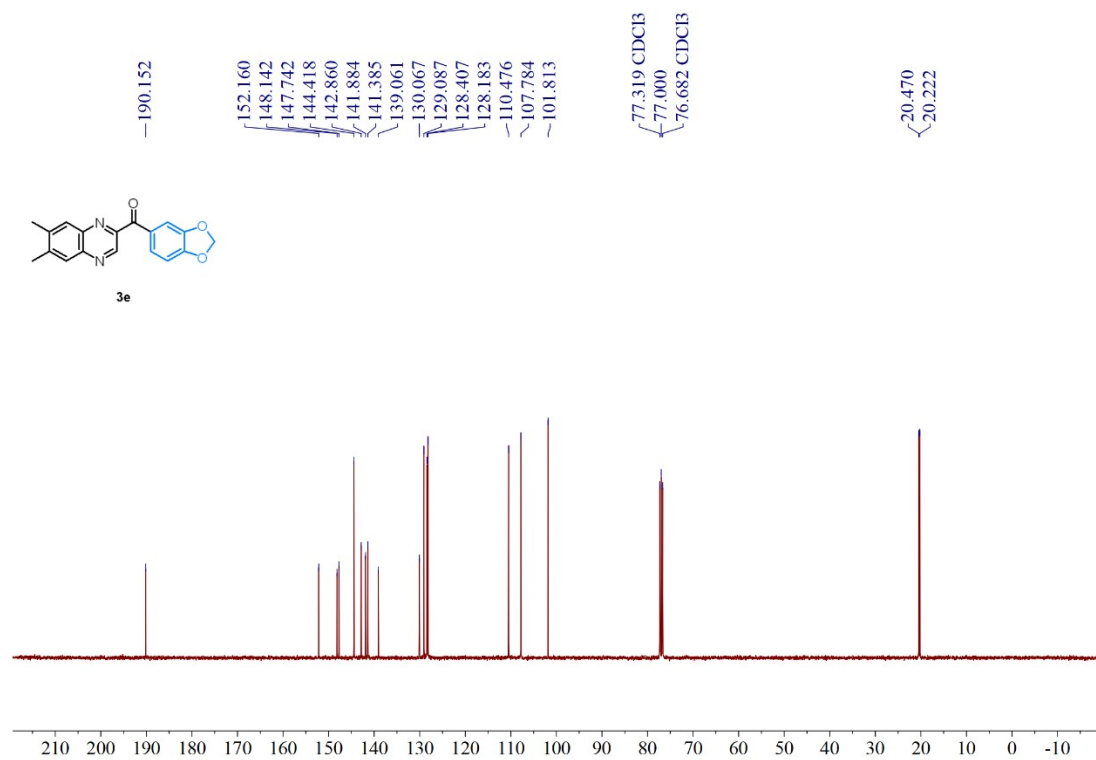

$^{13}\text{C}$  NMR Spectrum of Compound **3e** (100 MHz,  $\text{CDCl}_3$ )

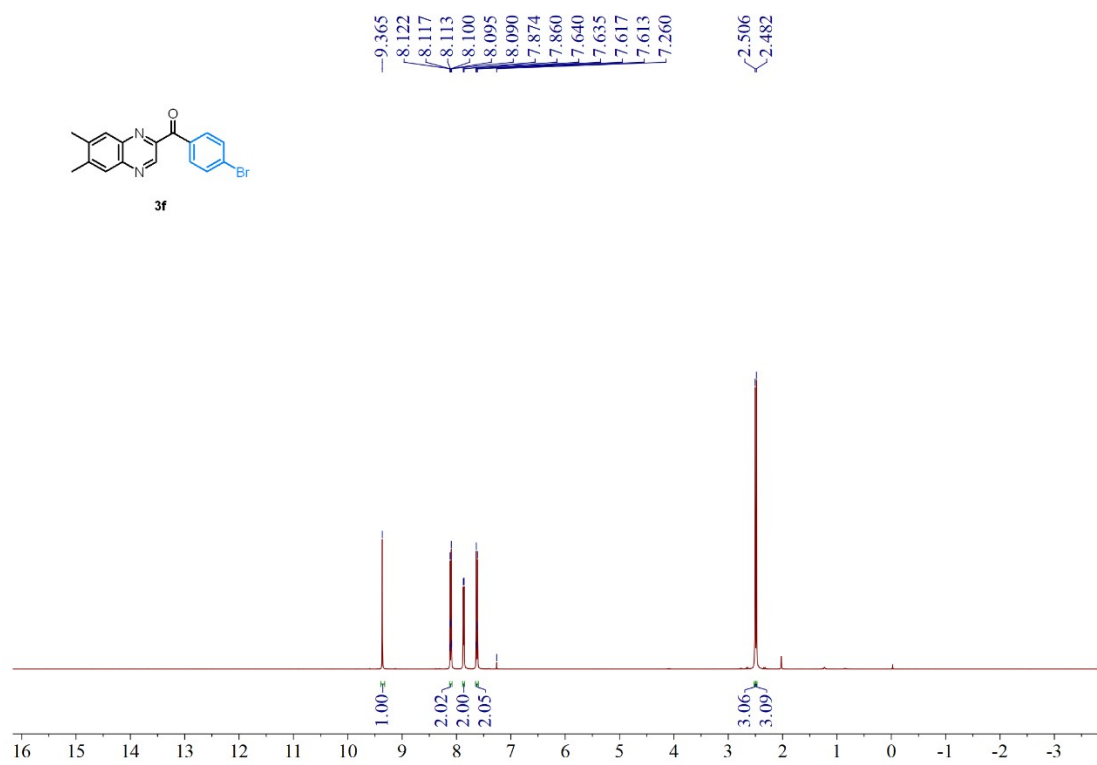

<sup>1</sup>H NMR Spectrum of Compound **3f** (400 MHz, CDCl<sub>3</sub>)

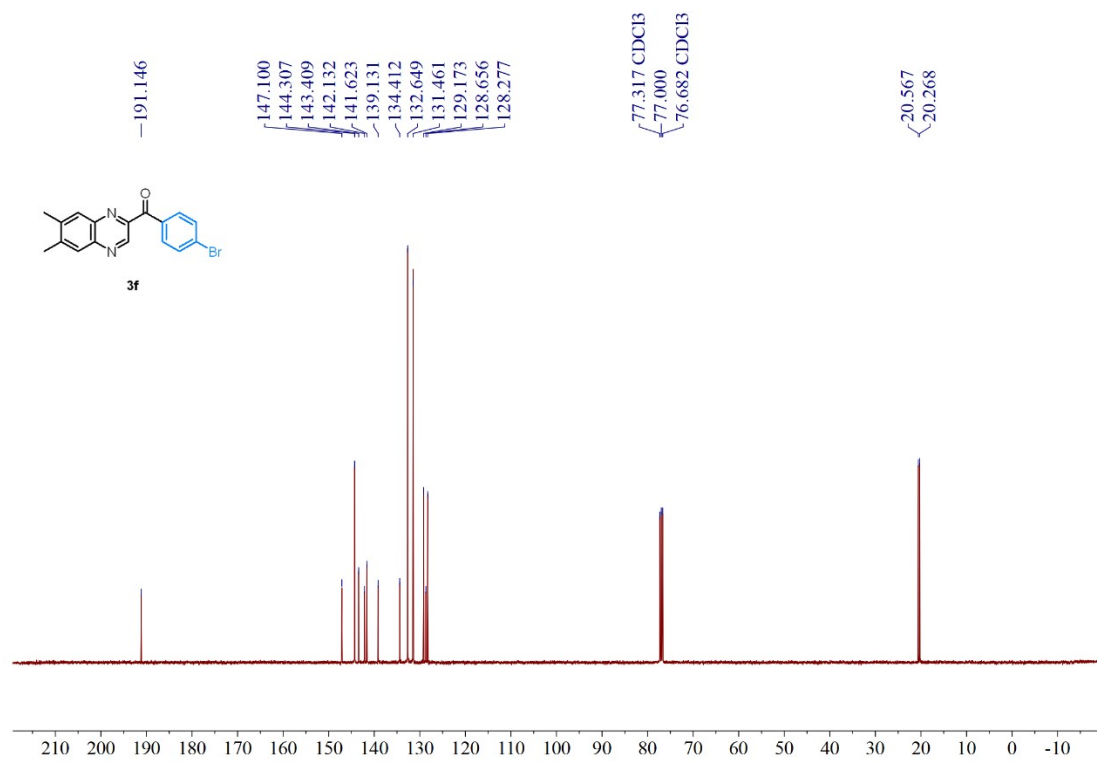

<sup>13</sup>C {<sup>1</sup>H} NMR Spectrum of Compound **3f** (100 MHz, CDCl<sub>3</sub>)

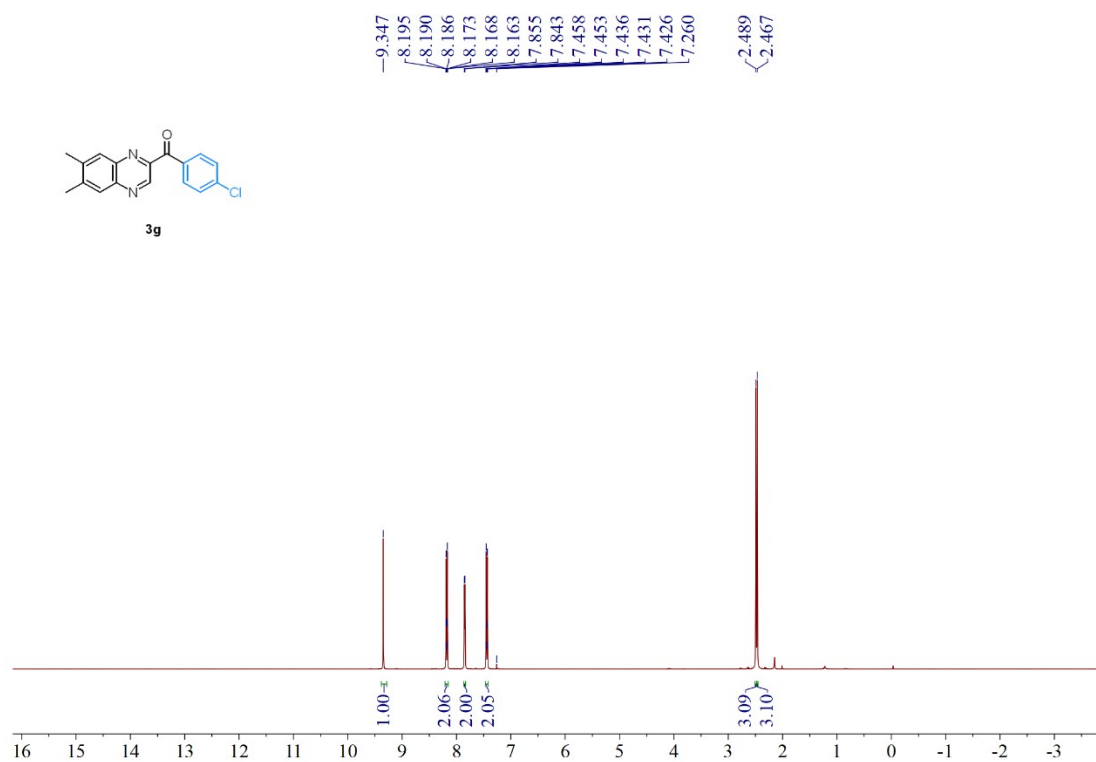

**<sup>1</sup>H NMR Spectrum of Compound **3g** (400 MHz, CDCl<sub>3</sub>)**

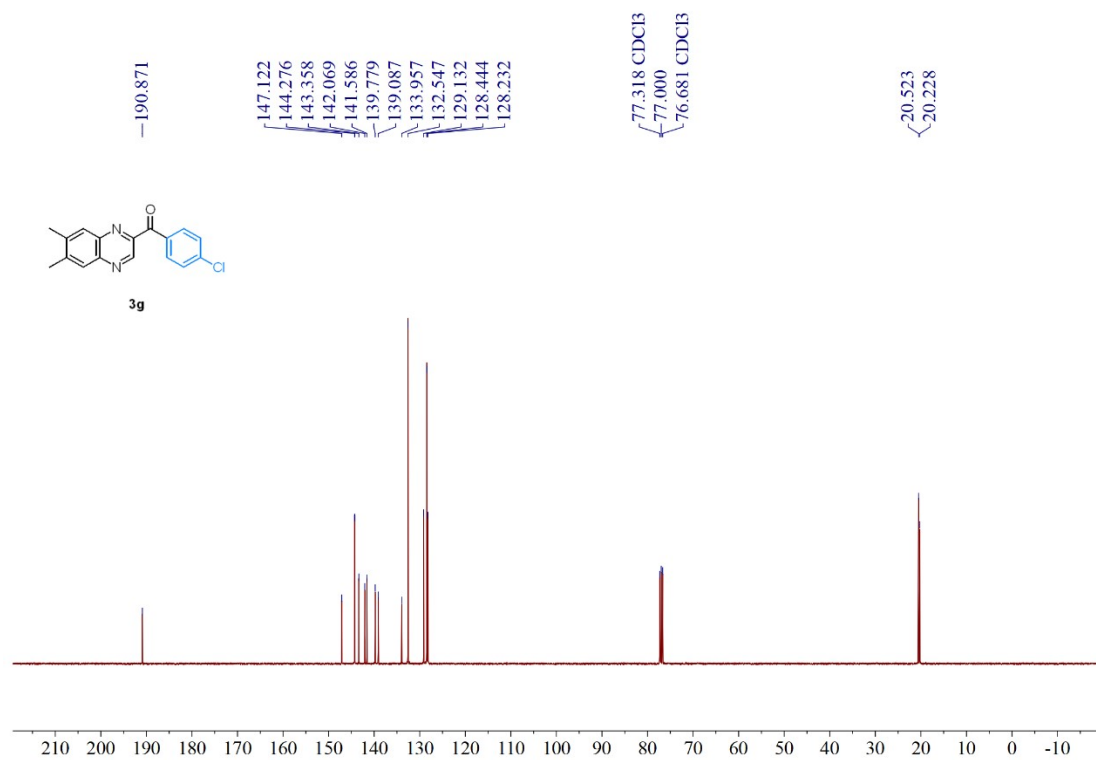

**<sup>13</sup>C {<sup>1</sup>H} NMR Spectrum of Compound **3g** (100 MHz, CDCl<sub>3</sub>)**



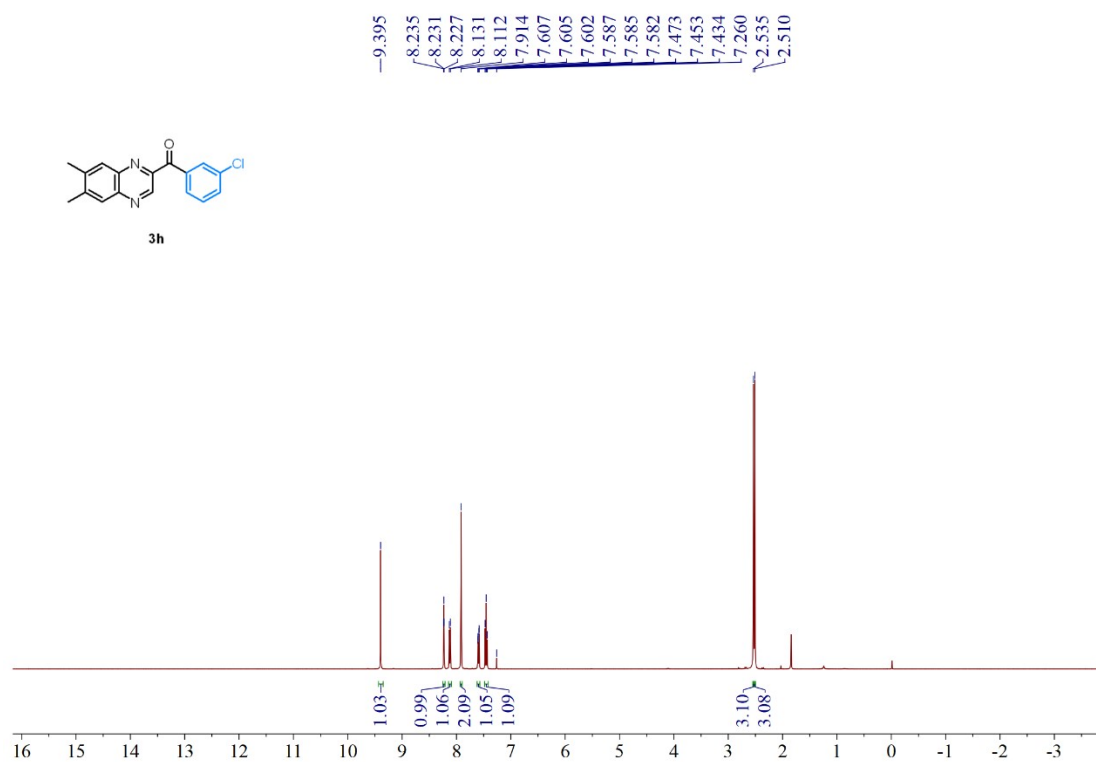

$^1\text{H}$  NMR Spectrum of Compound **3h** (400 MHz,  $\text{CDCl}_3$ )

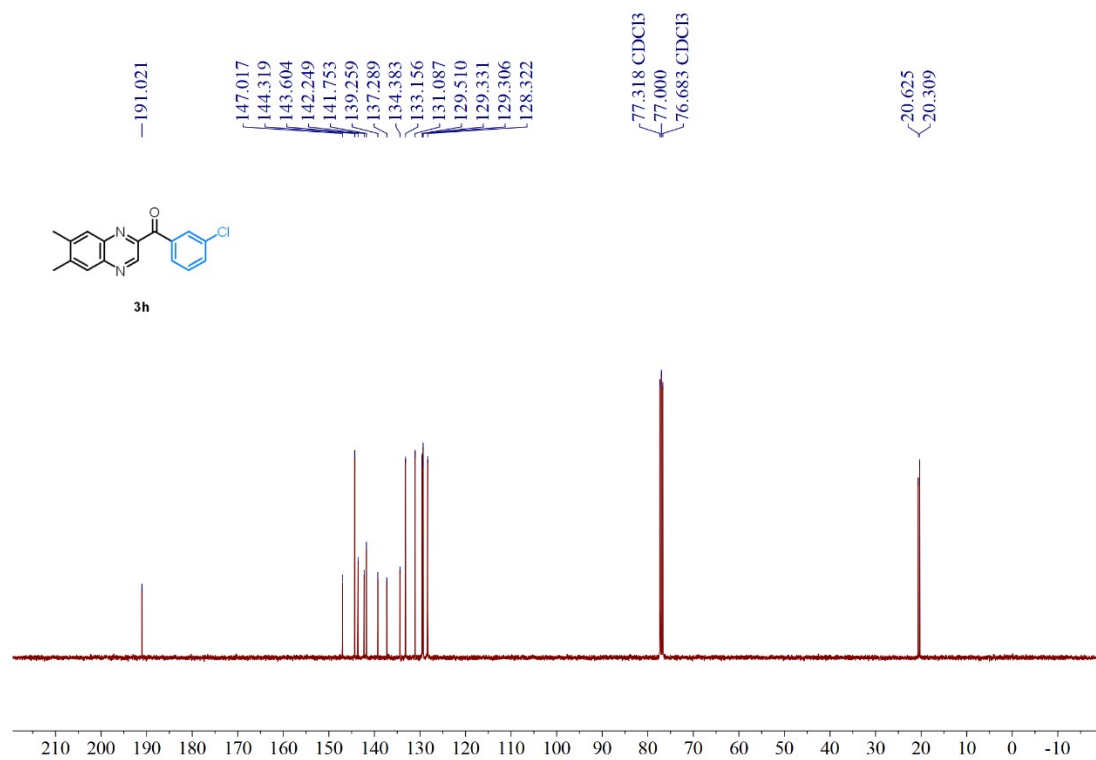

$^{13}\text{C}\{^1\text{H}\}$  NMR Spectrum of Compound **3h** (100 MHz,  $\text{CDCl}_3$ )

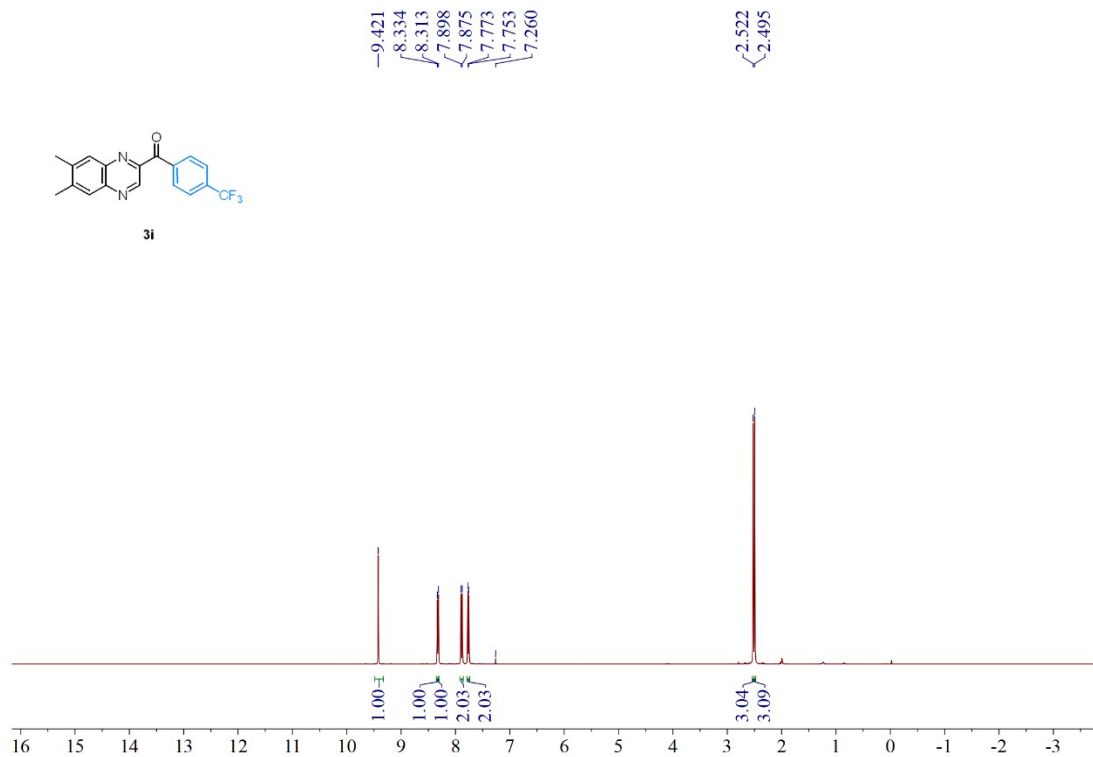

<sup>1</sup>H NMR Spectrum of Compound **3i** (400 MHz, CDCl<sub>3</sub>)

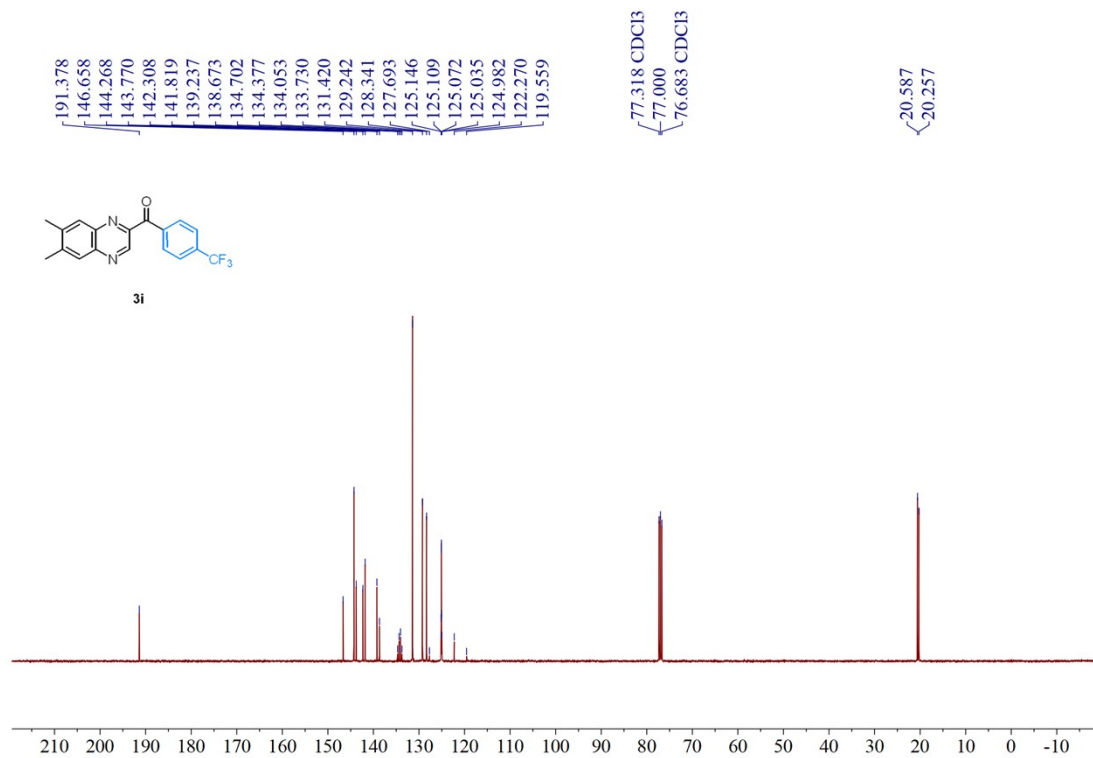

<sup>13</sup>C {<sup>1</sup>H} NMR Spectrum of Compound **3i** (100 MHz, CDCl<sub>3</sub>)

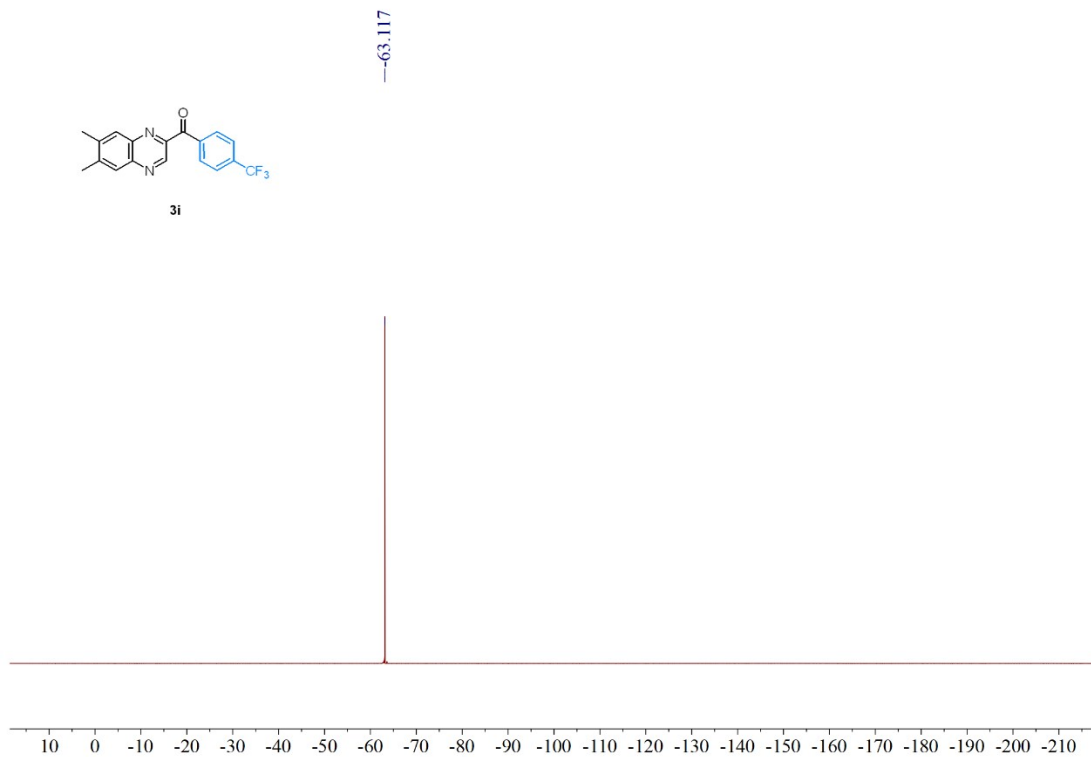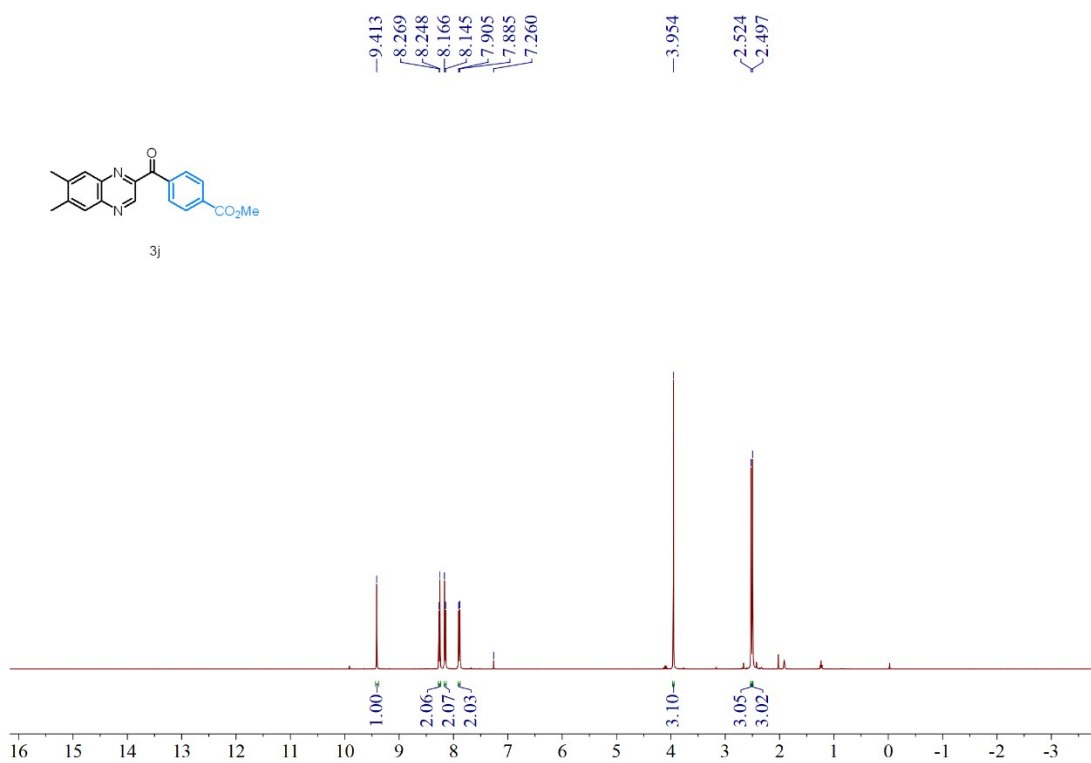

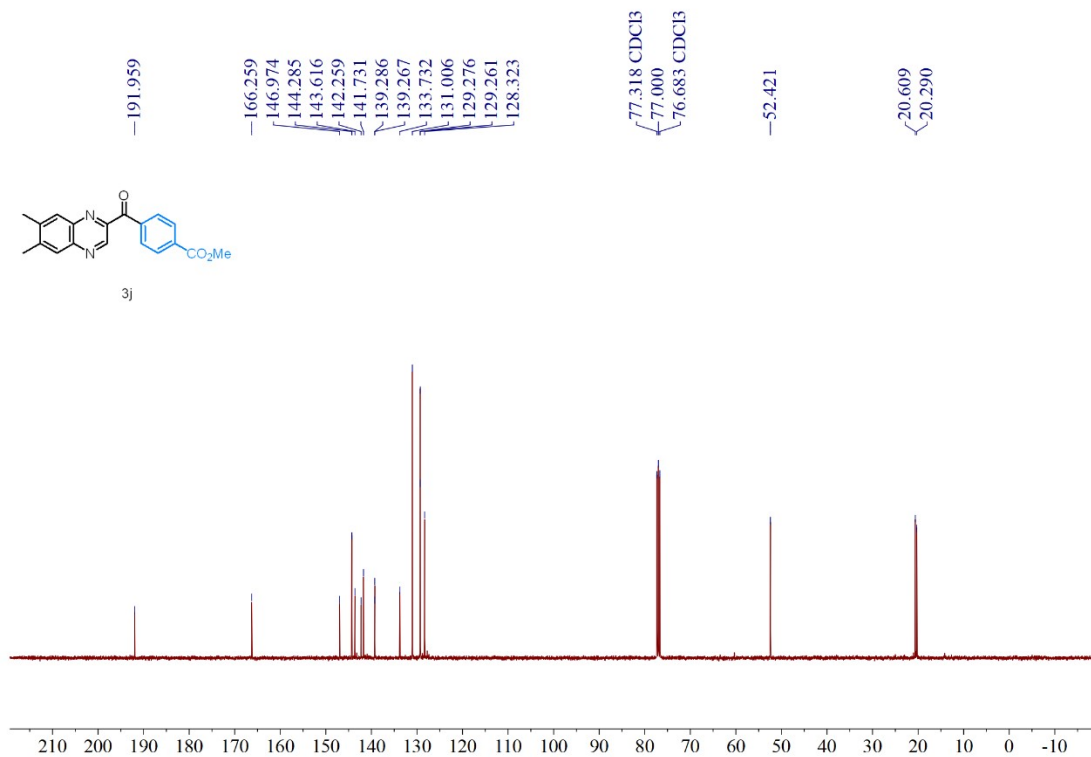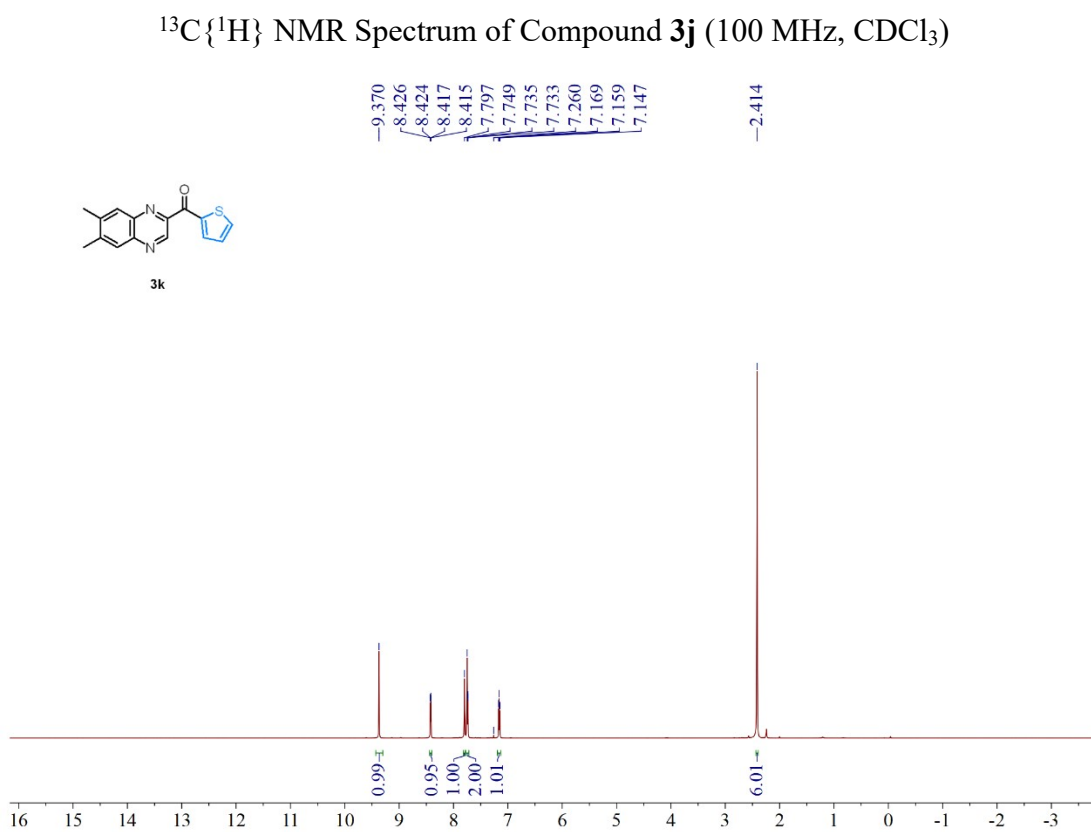

$^1\text{H}$  NMR Spectrum of Compound **3k** (400 MHz,  $\text{CDCl}_3$ )

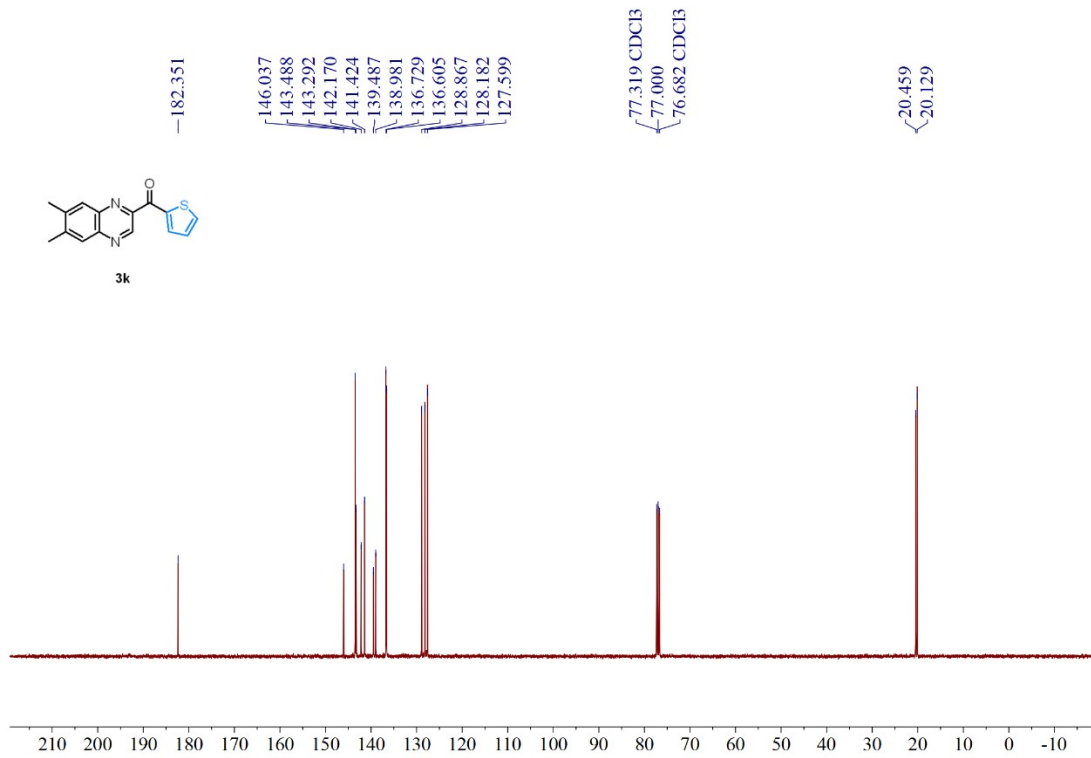

$^{13}\text{C}\{^1\text{H}\}$  NMR Spectrum of Compound **3k** (100 MHz,  $\text{CDCl}_3$ )

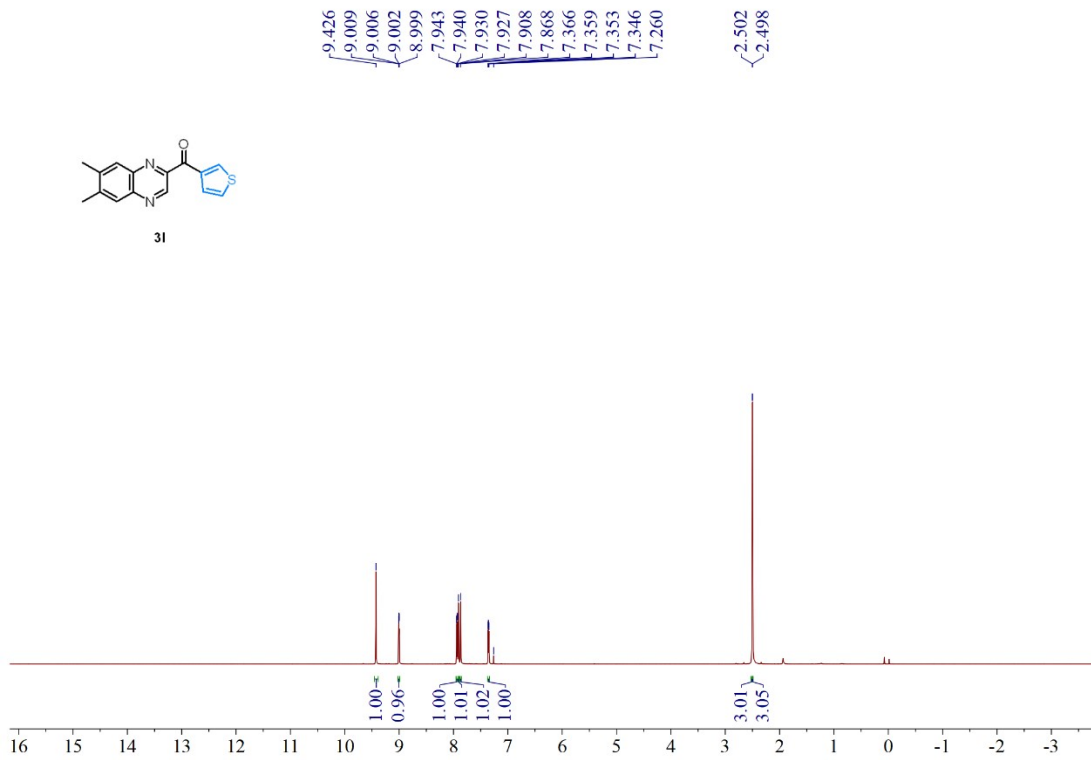

$^1\text{H}$  NMR Spectrum of Compound **3l** (400 MHz,  $\text{CDCl}_3$ )

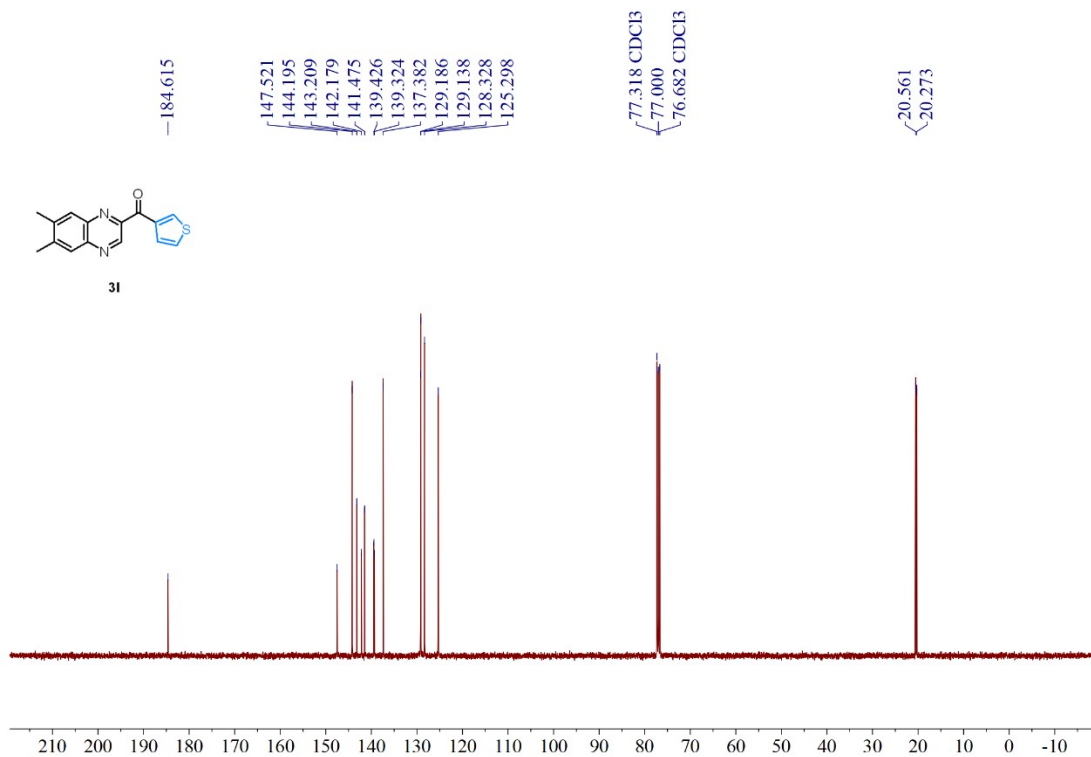

$^{13}\text{C}\{^1\text{H}\}$  NMR Spectrum of Compound **3l** (100 MHz,  $\text{CDCl}_3$ )

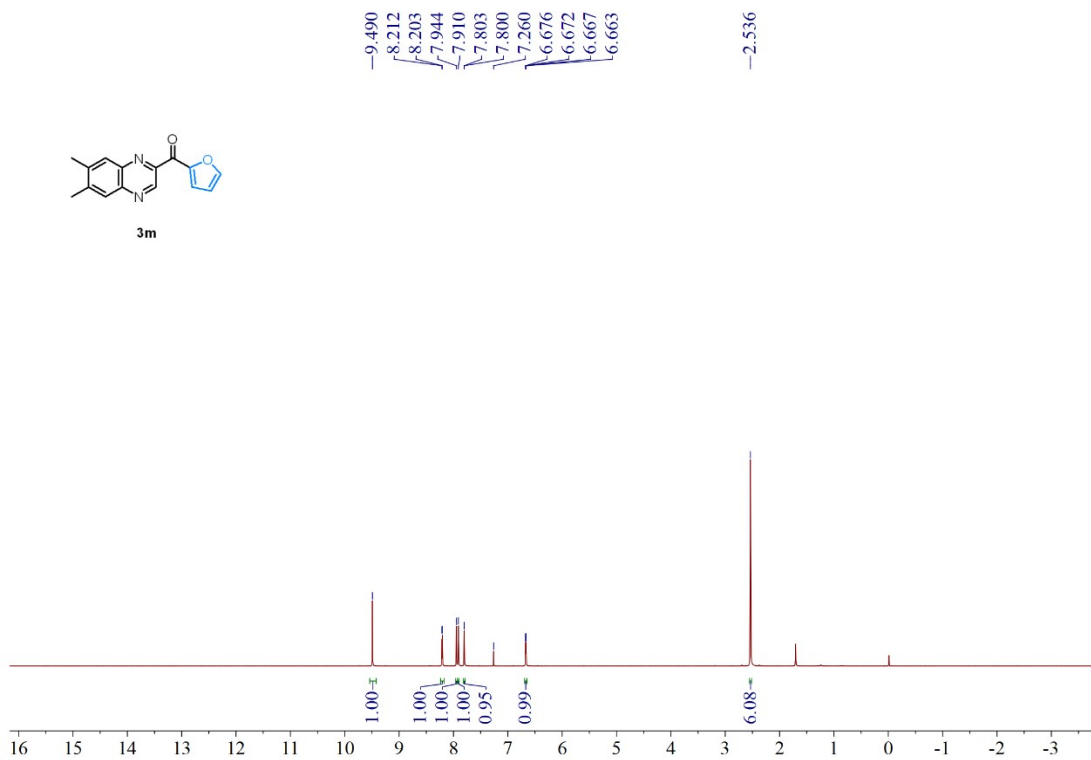

$^1\text{H}$  NMR Spectrum of Compound **3m** (400 MHz,  $\text{CDCl}_3$ )

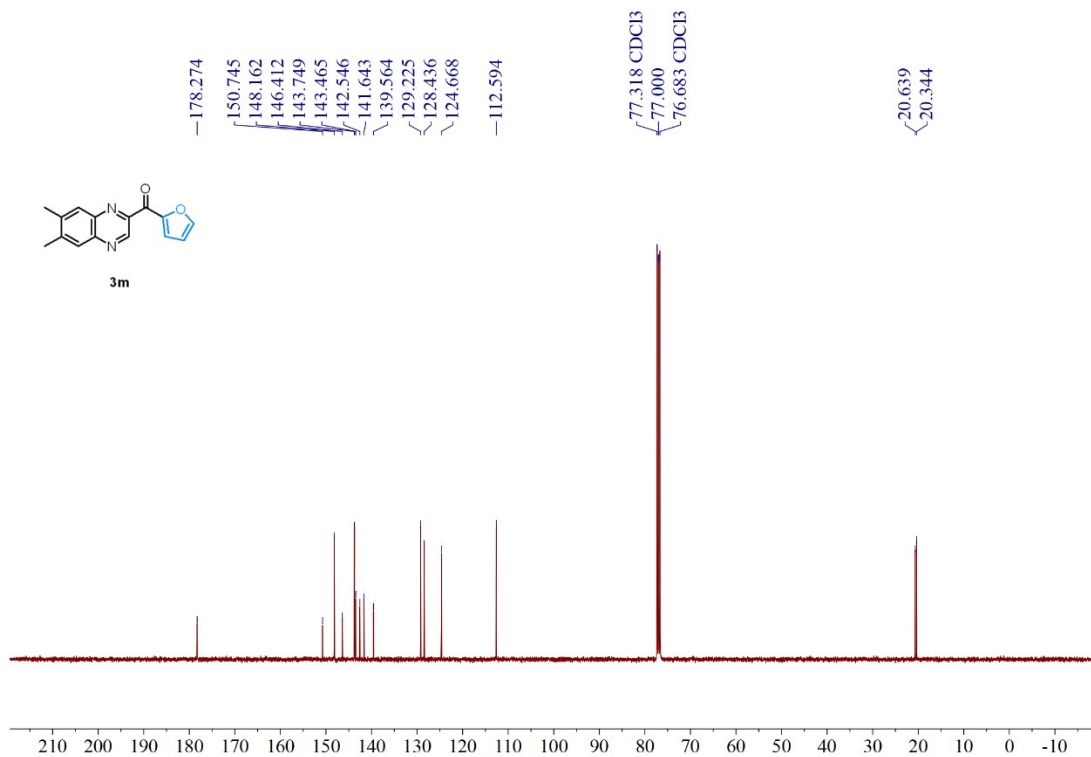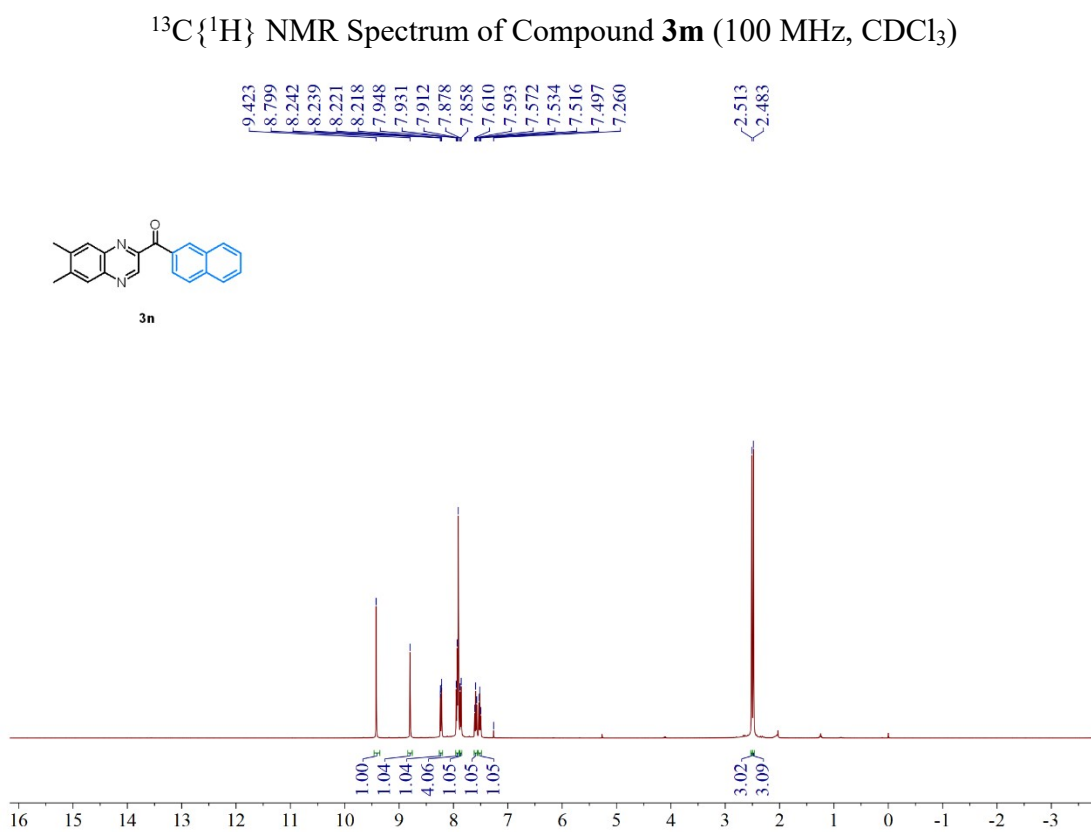

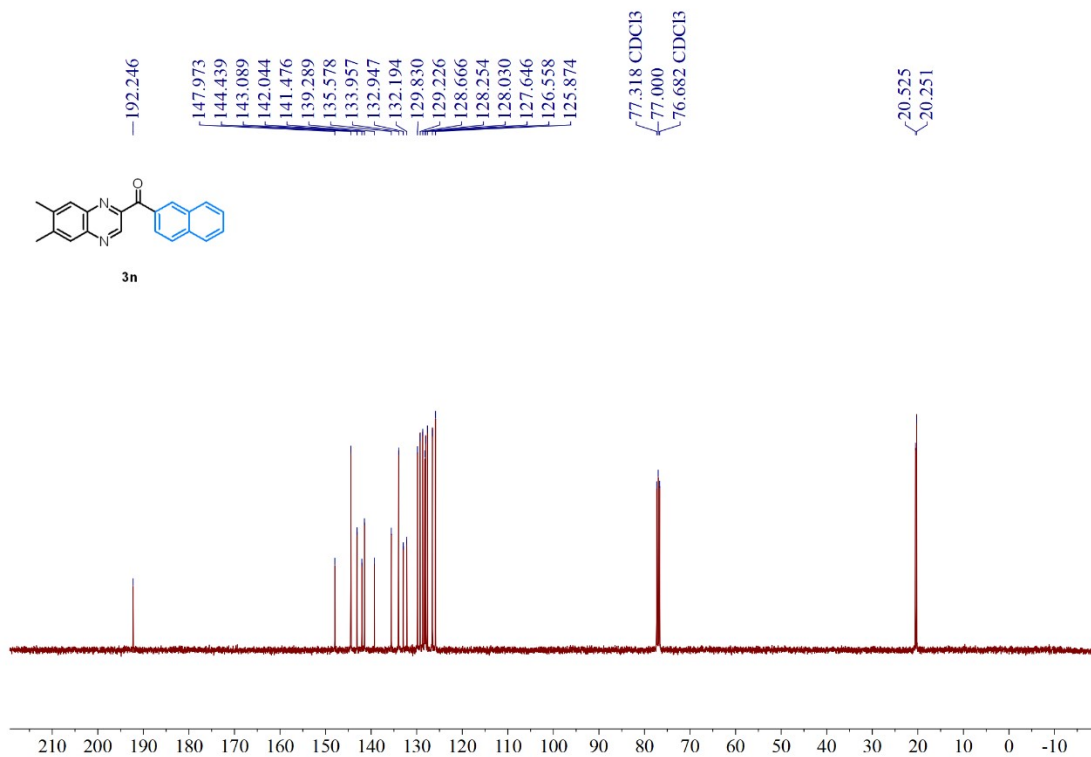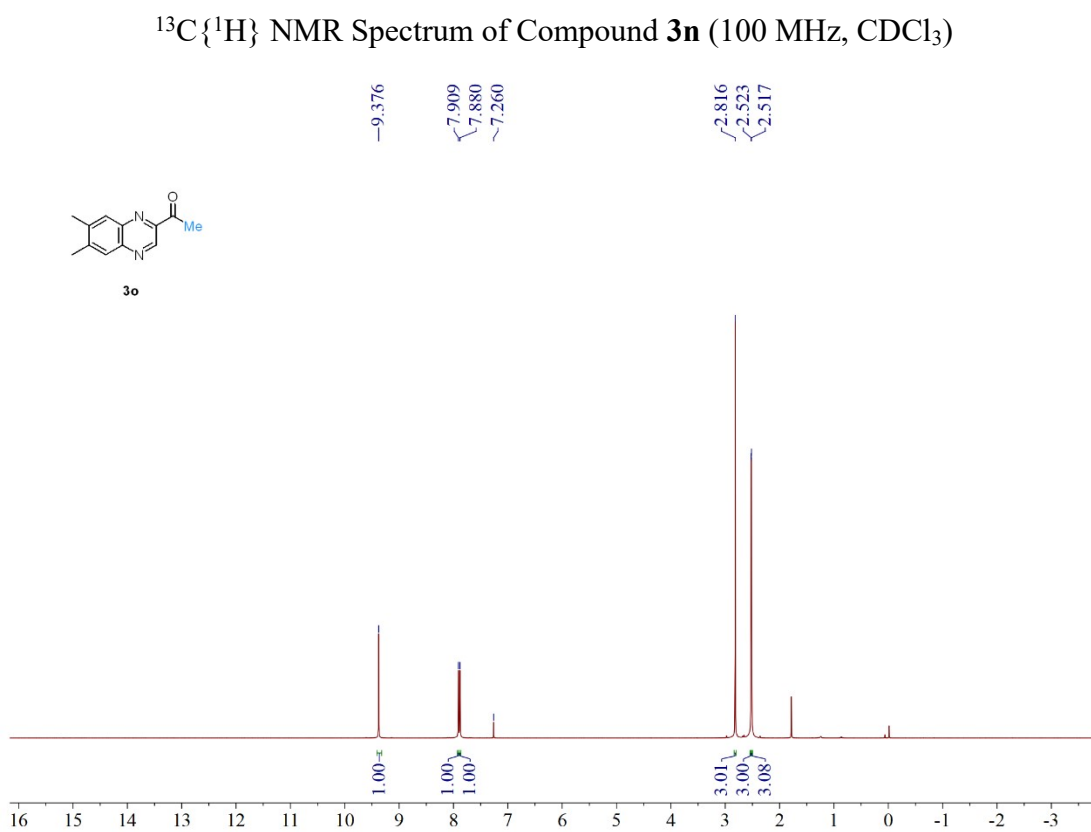

$^1\text{H}$  NMR Spectrum of Compound **3o** (400 MHz,  $\text{CDCl}_3$ )



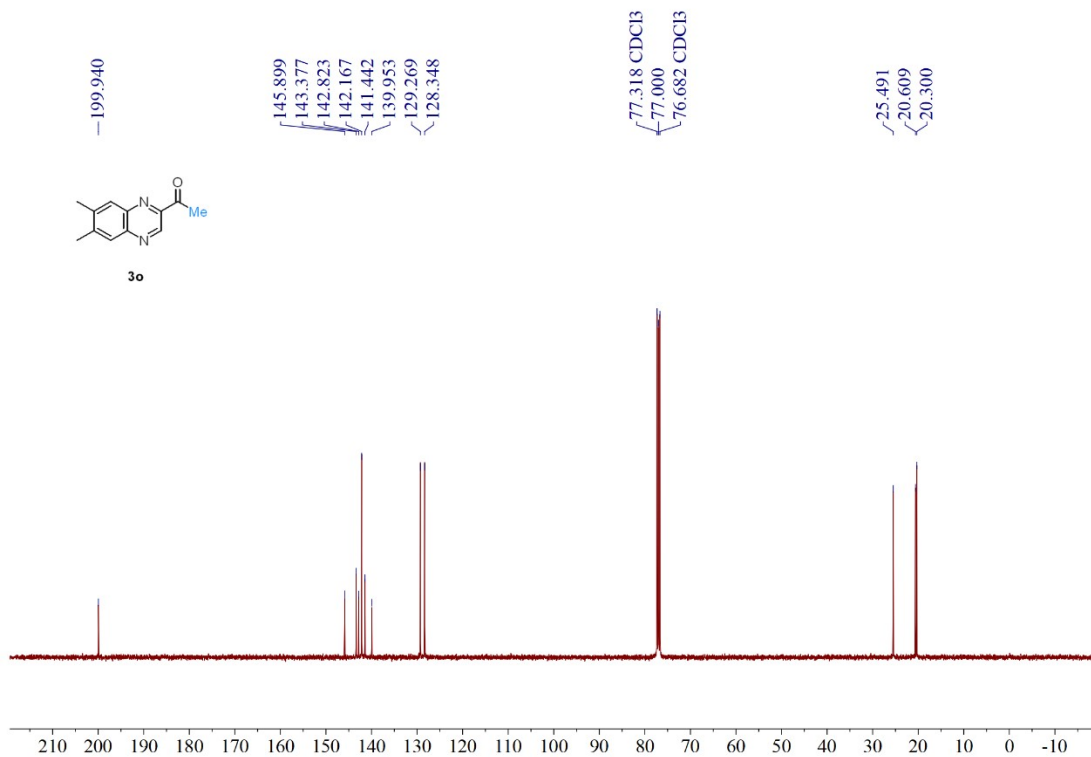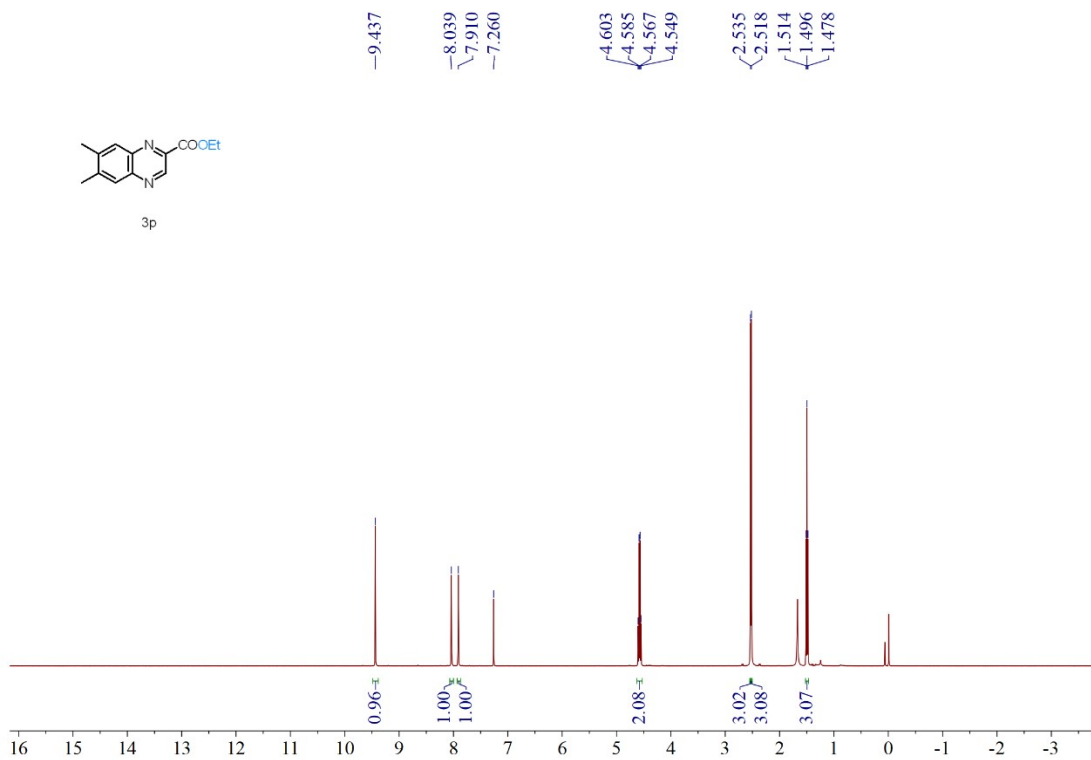

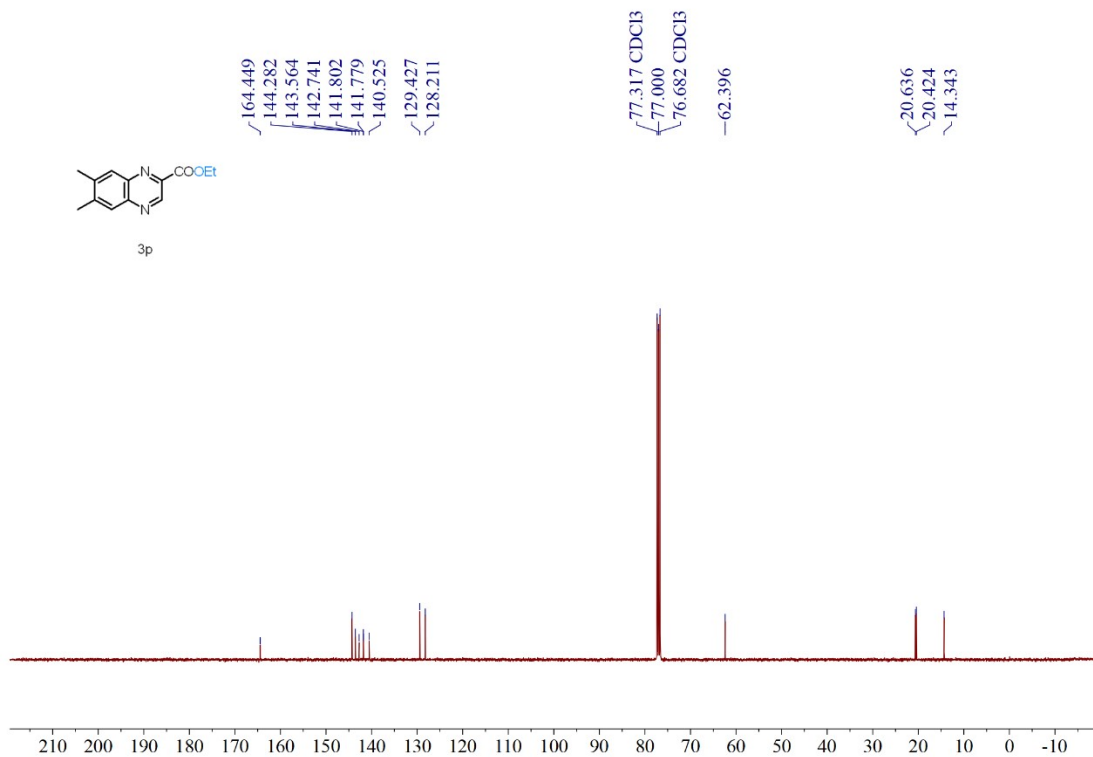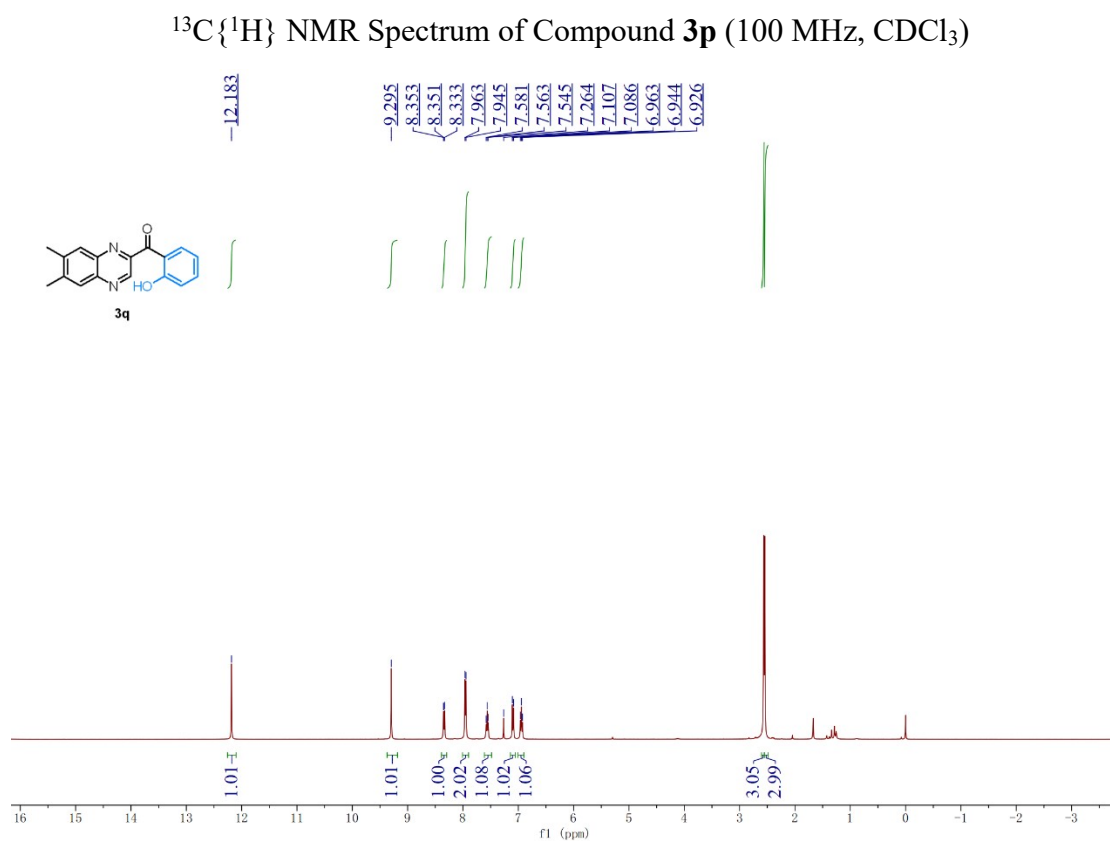

$^1\text{H}$  NMR Spectrum of Compound **3q** (400 MHz,  $\text{CDCl}_3$ )

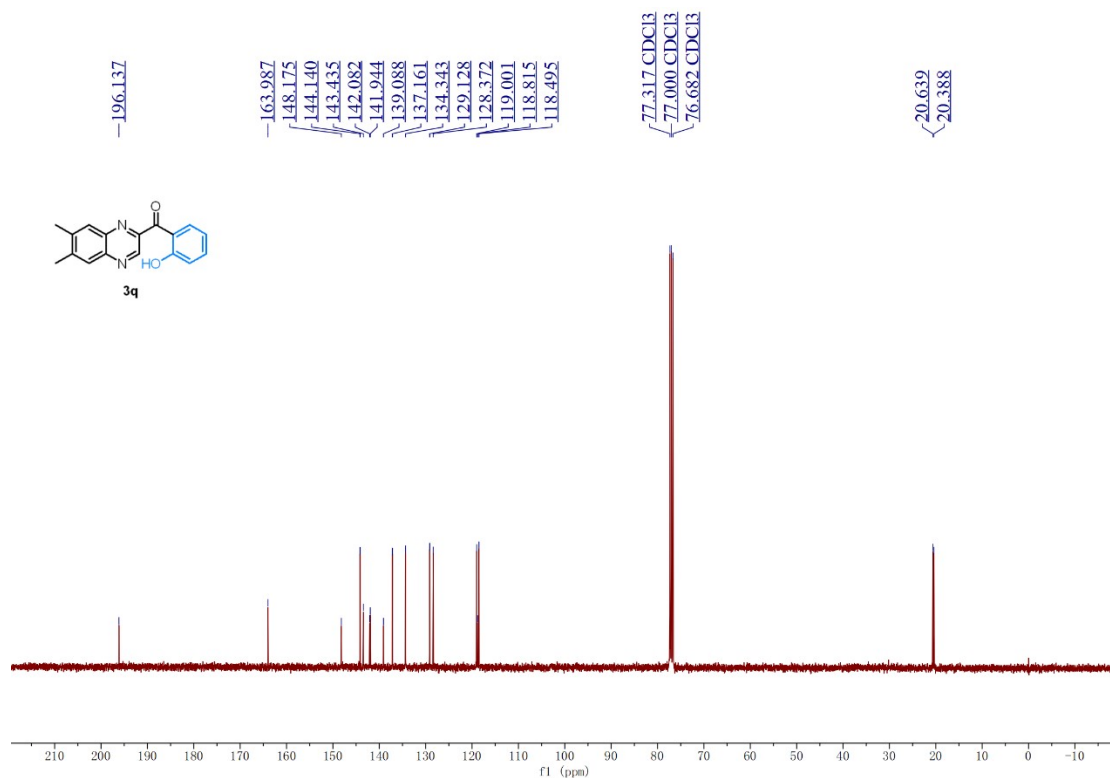

$^{13}\text{C}\{^1\text{H}\}$  NMR Spectrum of Compound **3q** (100 MHz, CDCl<sub>3</sub>)

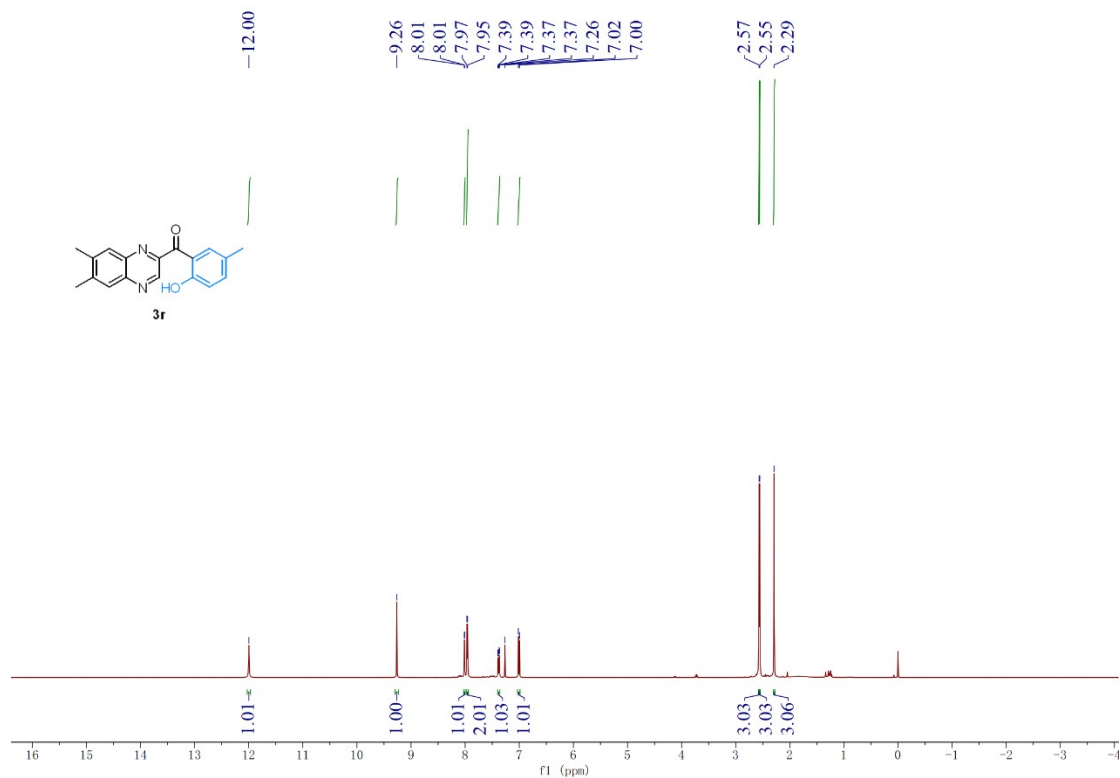

$^1\text{H}$  NMR Spectrum of Compound **3r** (400 MHz, CDCl<sub>3</sub>)

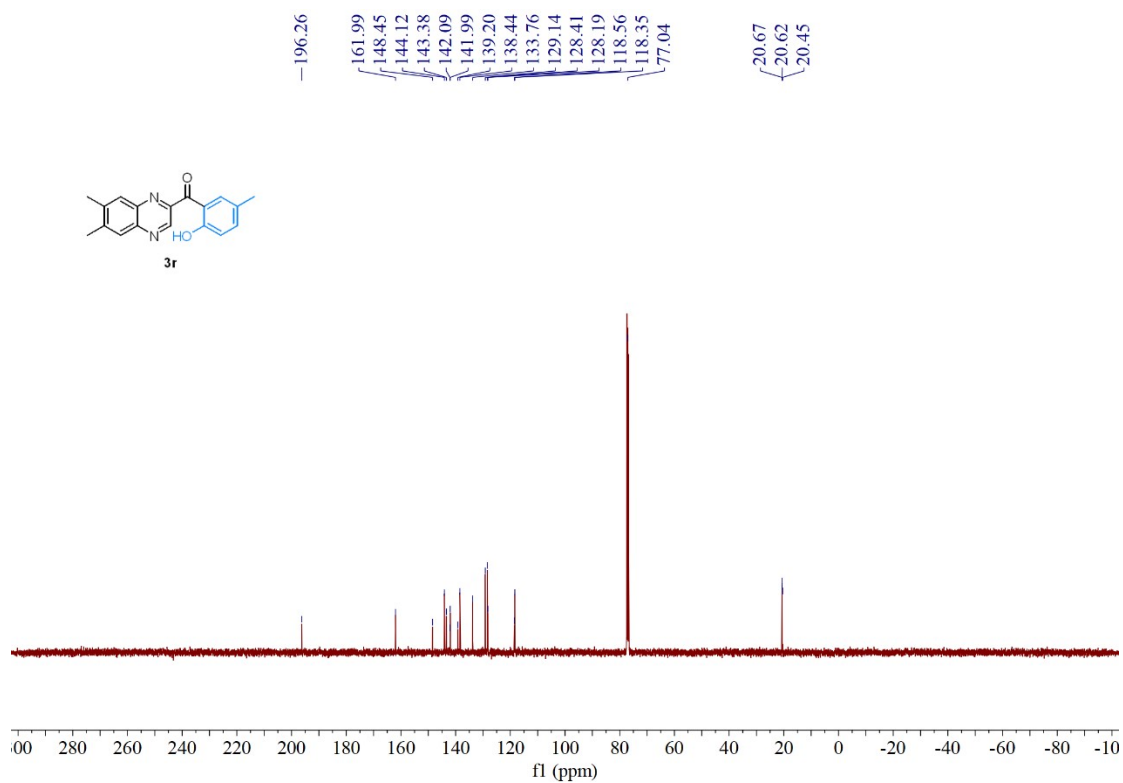

$^{13}\text{C}\{^1\text{H}\}$  NMR Spectrum of Compound **3r** (100 MHz,  $\text{CDCl}_3$ )

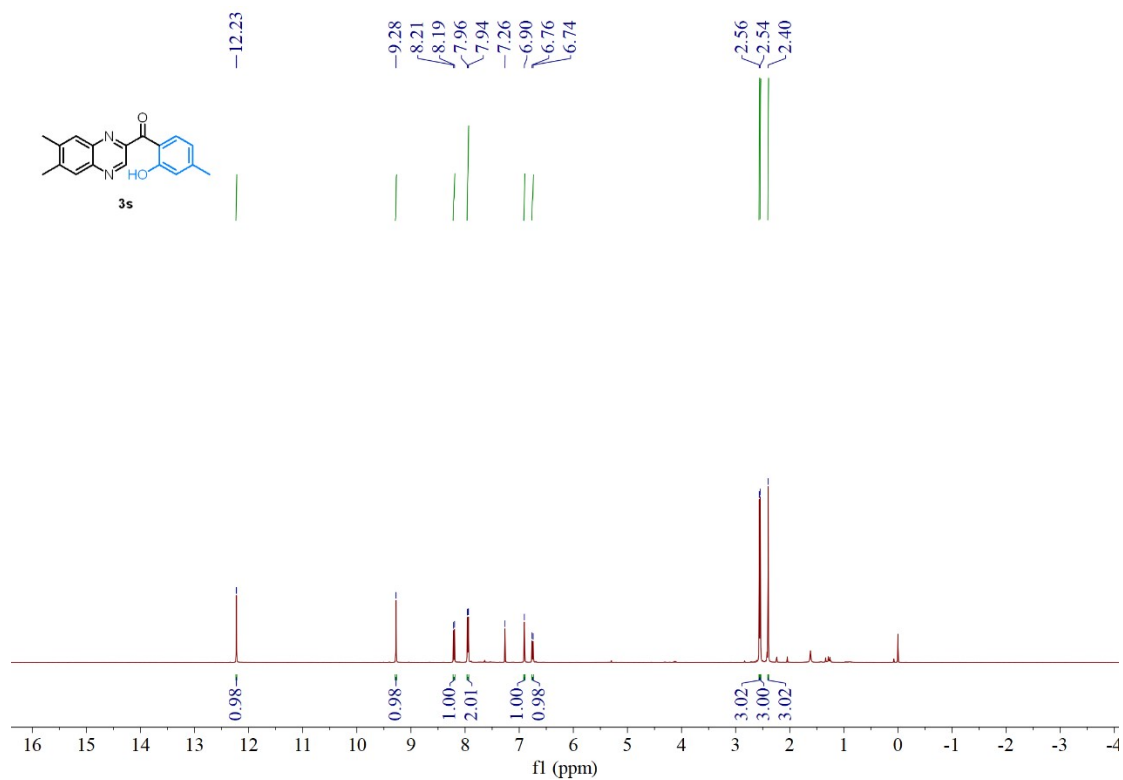

$^1\text{H}$  NMR Spectrum of Compound **3s** (400 MHz,  $\text{CDCl}_3$ )

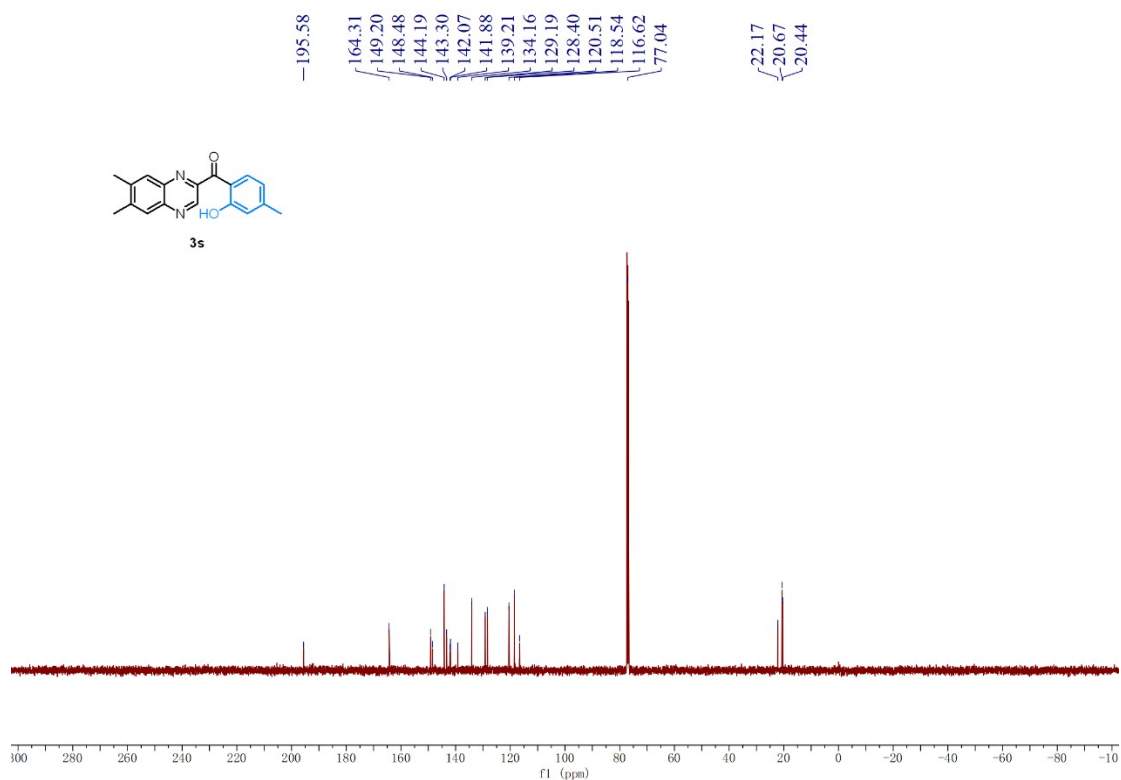

**<sup>13</sup>C {<sup>1</sup>H} NMR Spectrum of Compound 3s (100 MHz, CDCl<sub>3</sub>)**

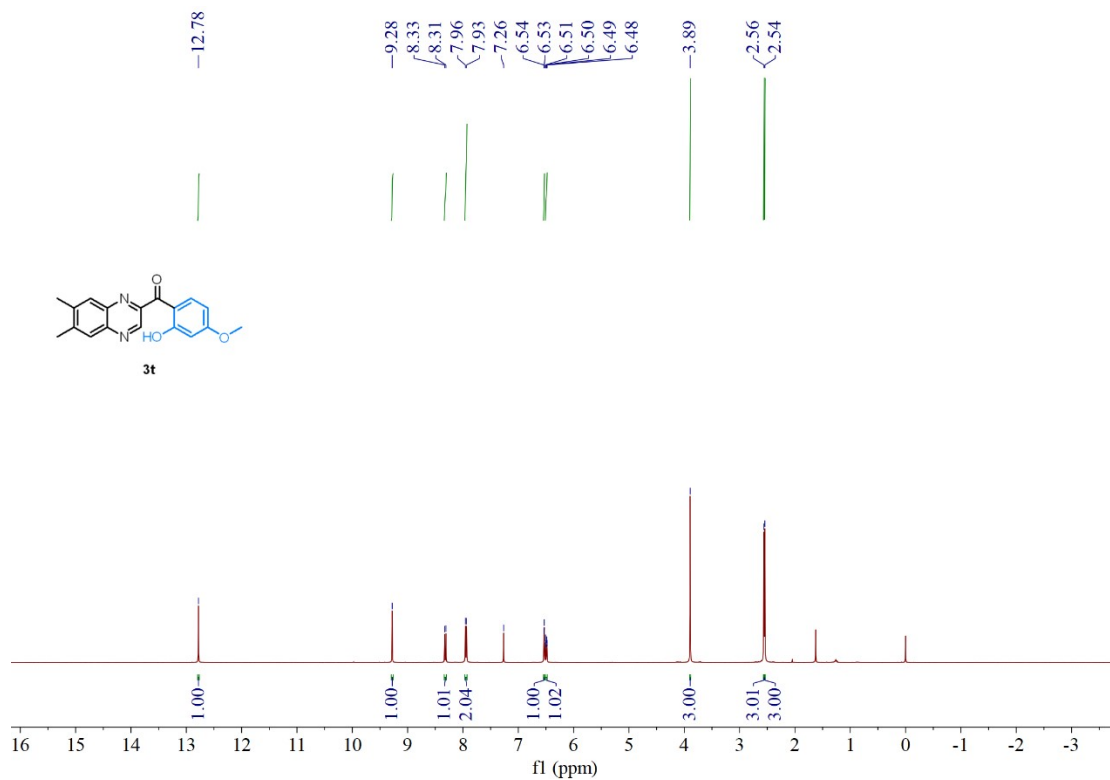

**<sup>1</sup>H NMR Spectrum of Compound 3t (400 MHz, CDCl<sub>3</sub>)**

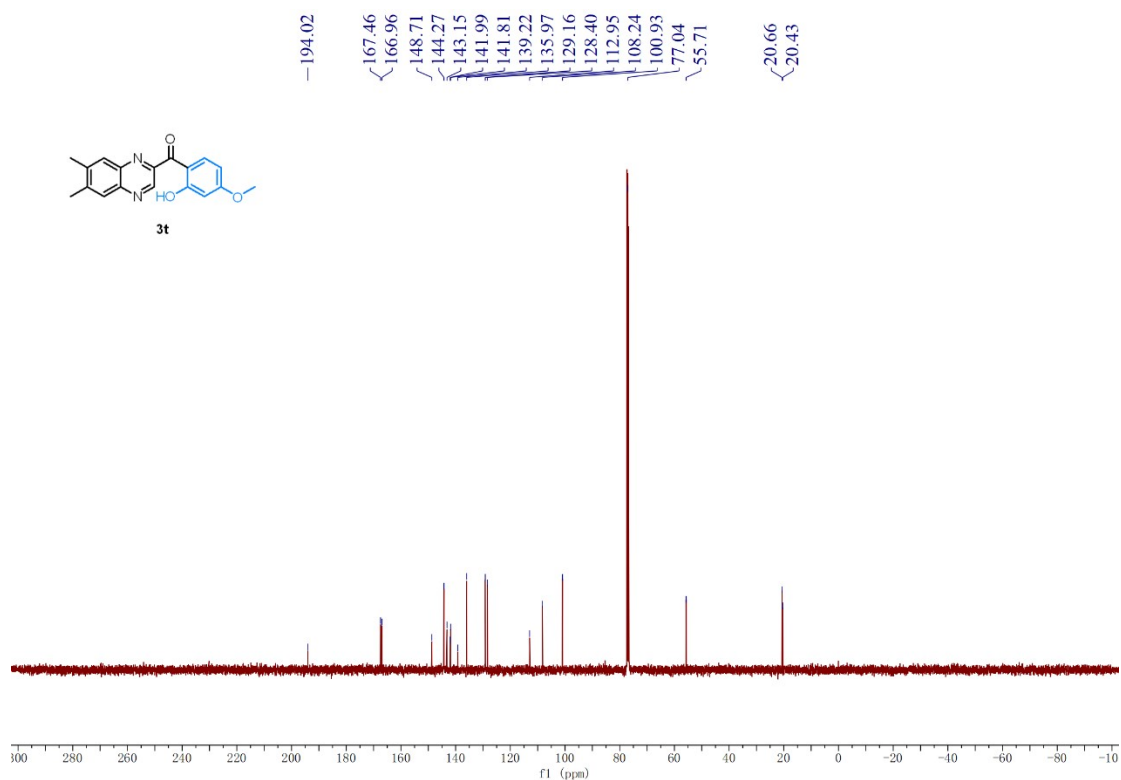

$^{13}\text{C}\{^1\text{H}\}$  NMR Spectrum of Compound **3t** (100 MHz,  $\text{CDCl}_3$ )

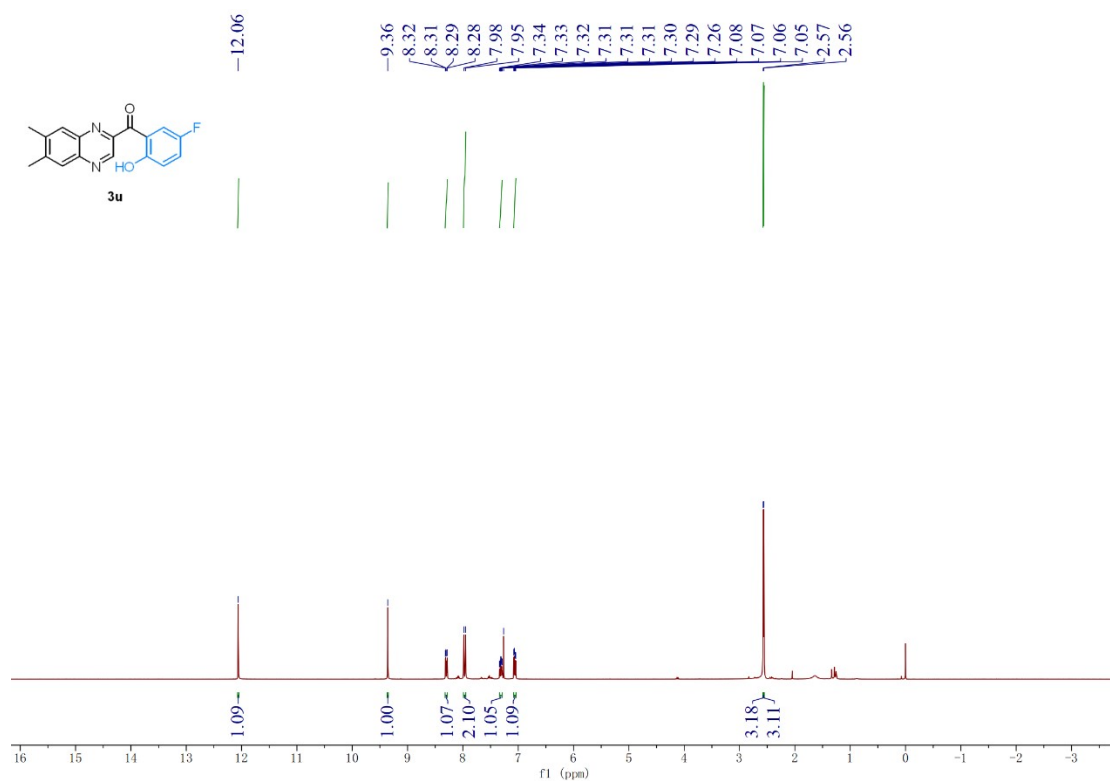

$^1\text{H}$  NMR Spectrum of Compound **3u** (400 MHz,  $\text{CDCl}_3$ )

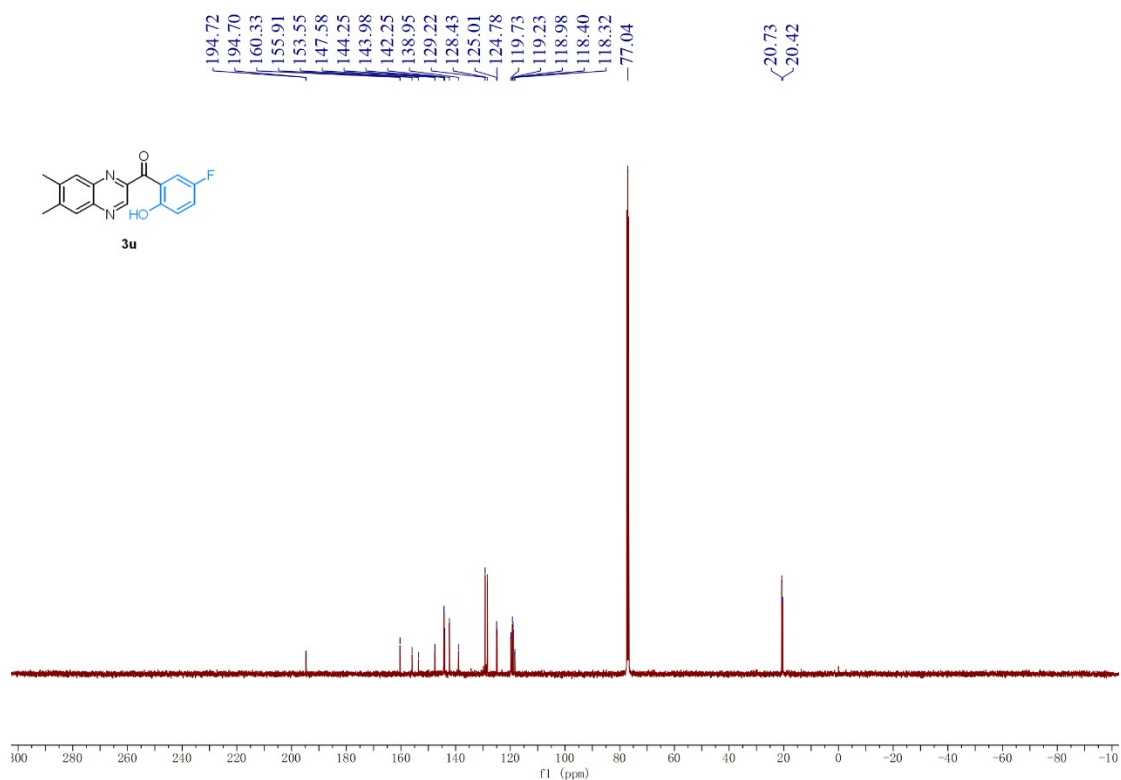

$^{13}\text{C}\{^1\text{H}\}$  NMR Spectrum of Compound **3u** (100 MHz,  $\text{CDCl}_3$ )

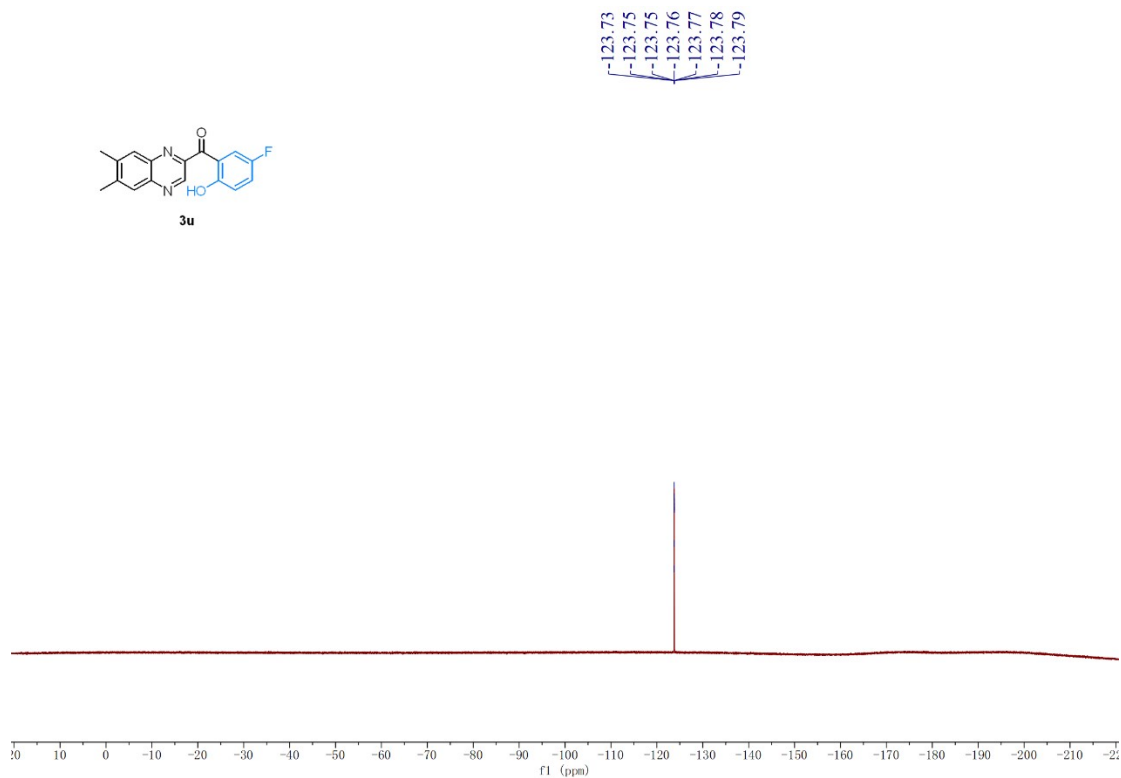

$^{19}\text{F}\{^1\text{H}\}$  NMR Spectrum of Compound **3u** (376 MHz,  $\text{CDCl}_3$ )

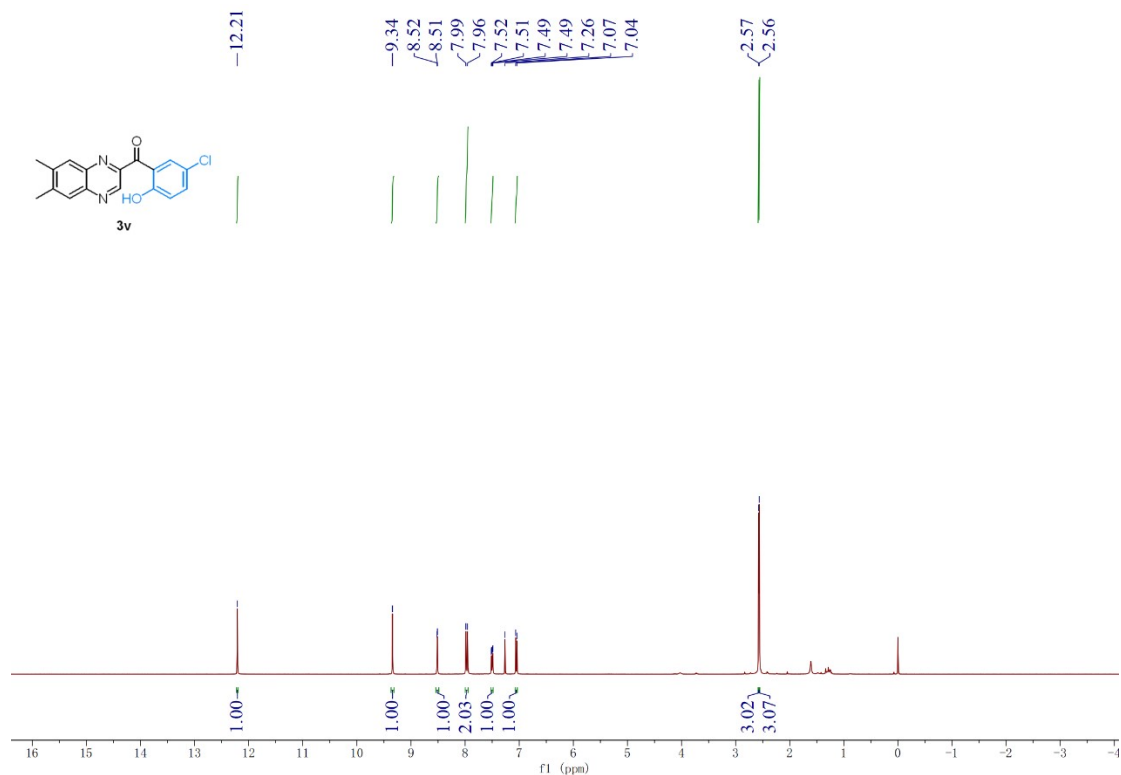

**<sup>1</sup>H NMR Spectrum of Compound 3v (400 MHz, CDCl<sub>3</sub>)**

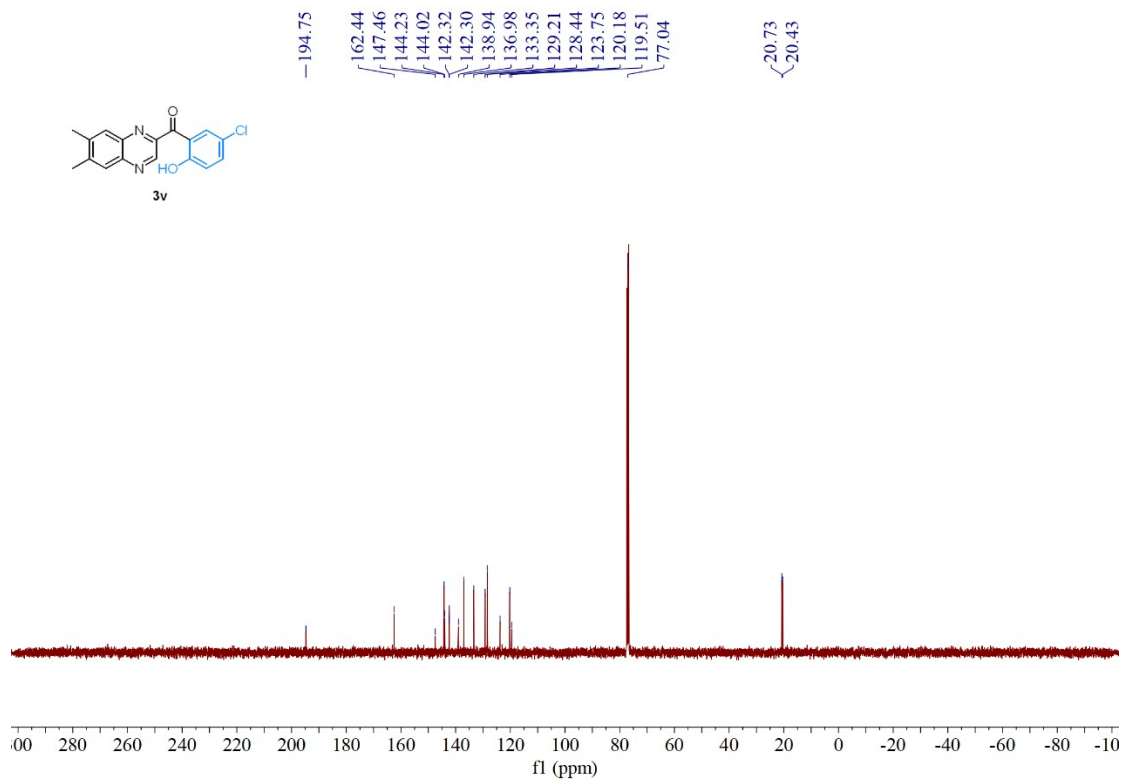

**<sup>13</sup>C{<sup>1</sup>H} NMR Spectrum of Compound 3v (100 MHz, CDCl<sub>3</sub>)**



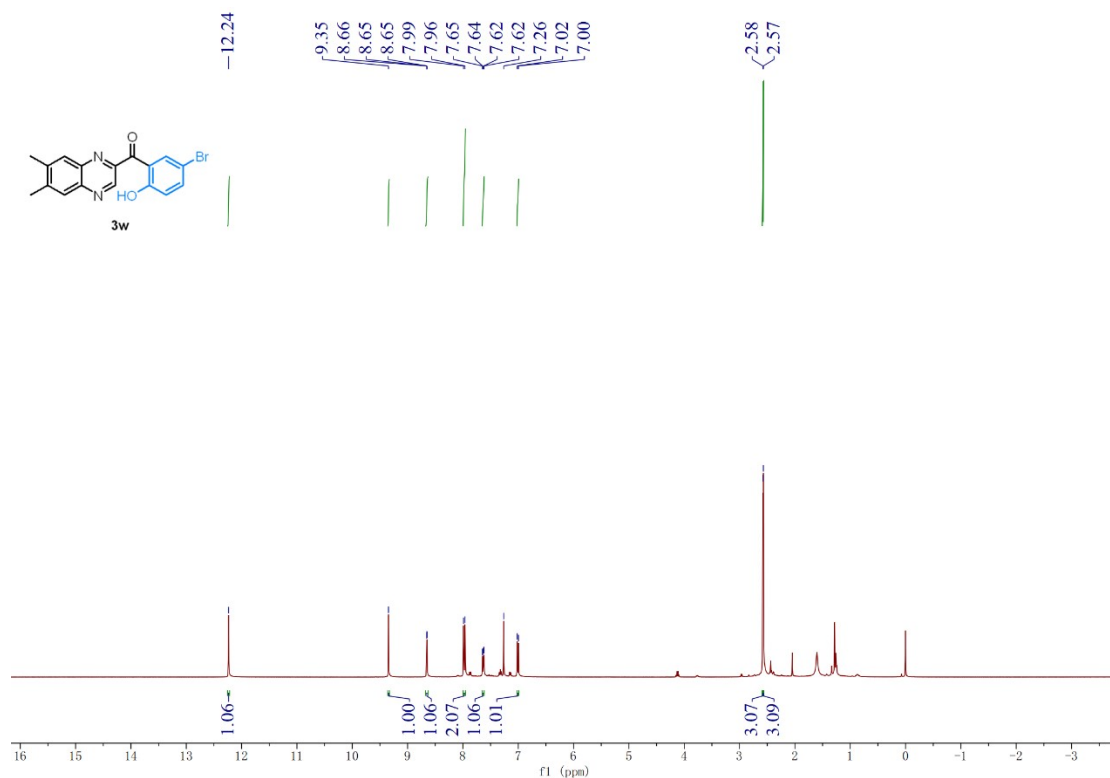

**<sup>1</sup>H NMR Spectrum of Compound 3w (400 MHz, CDCl<sub>3</sub>)**

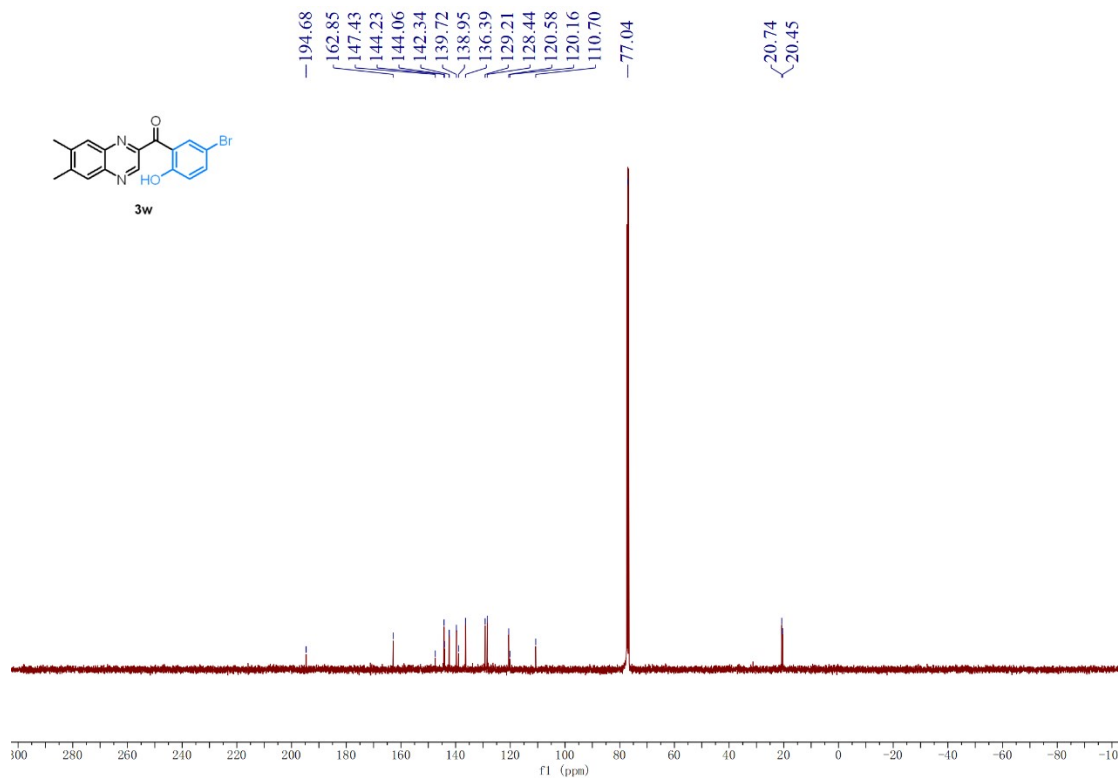

**<sup>13</sup>C{<sup>1</sup>H} NMR Spectrum of Compound 3w (100 MHz, CDCl<sub>3</sub>)**

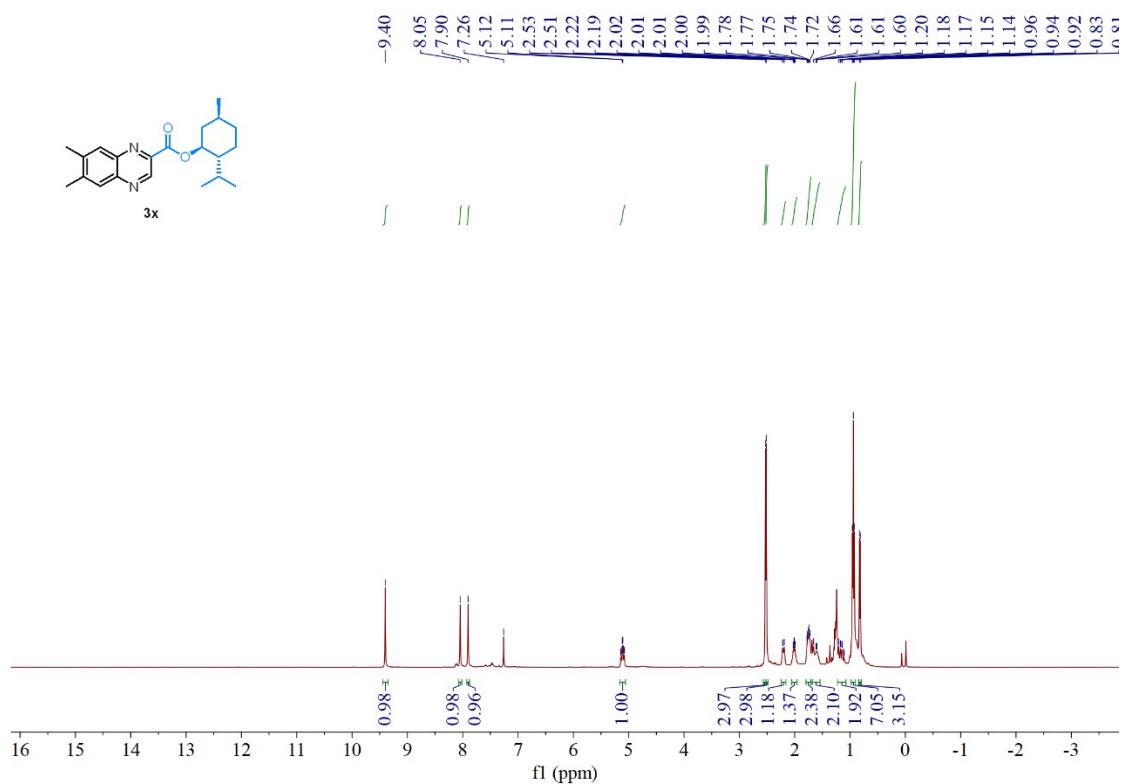

$^1\text{H}$  NMR Spectrum of Compound **3x** (400 MHz,  $\text{CDCl}_3$ )

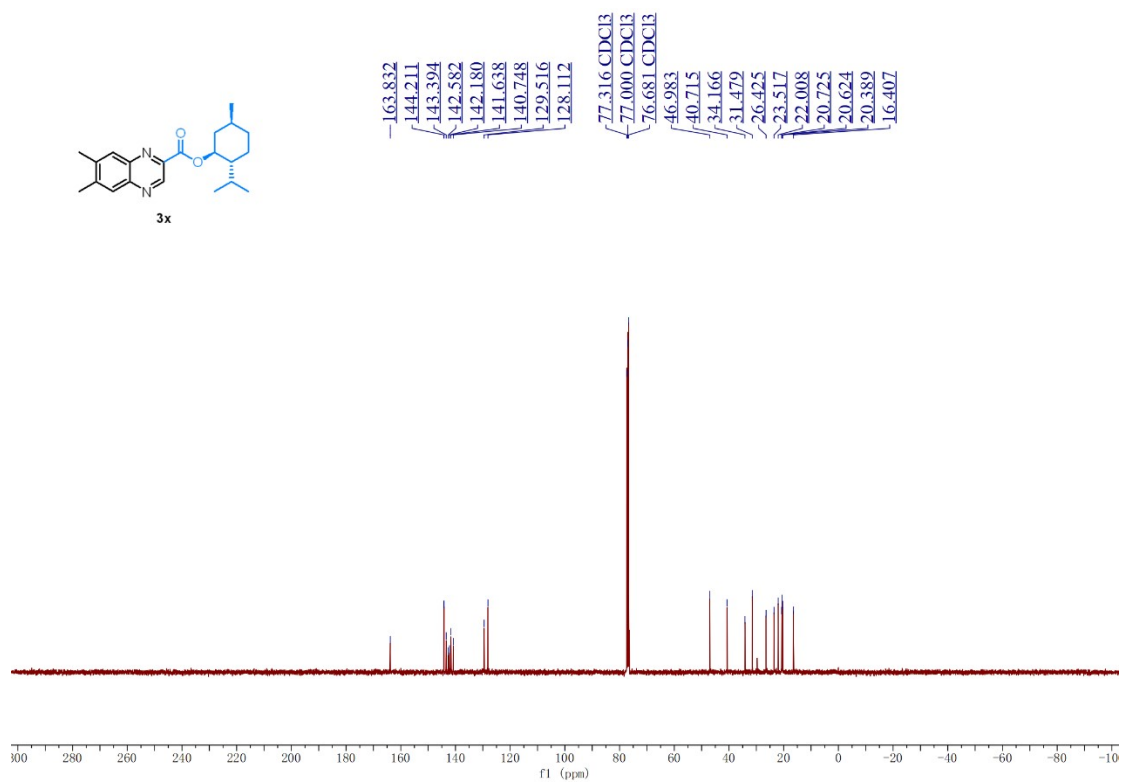

$^{13}\text{C}\{^1\text{H}\}$  NMR Spectrum of Compound **3x** (100 MHz,  $\text{CDCl}_3$ )

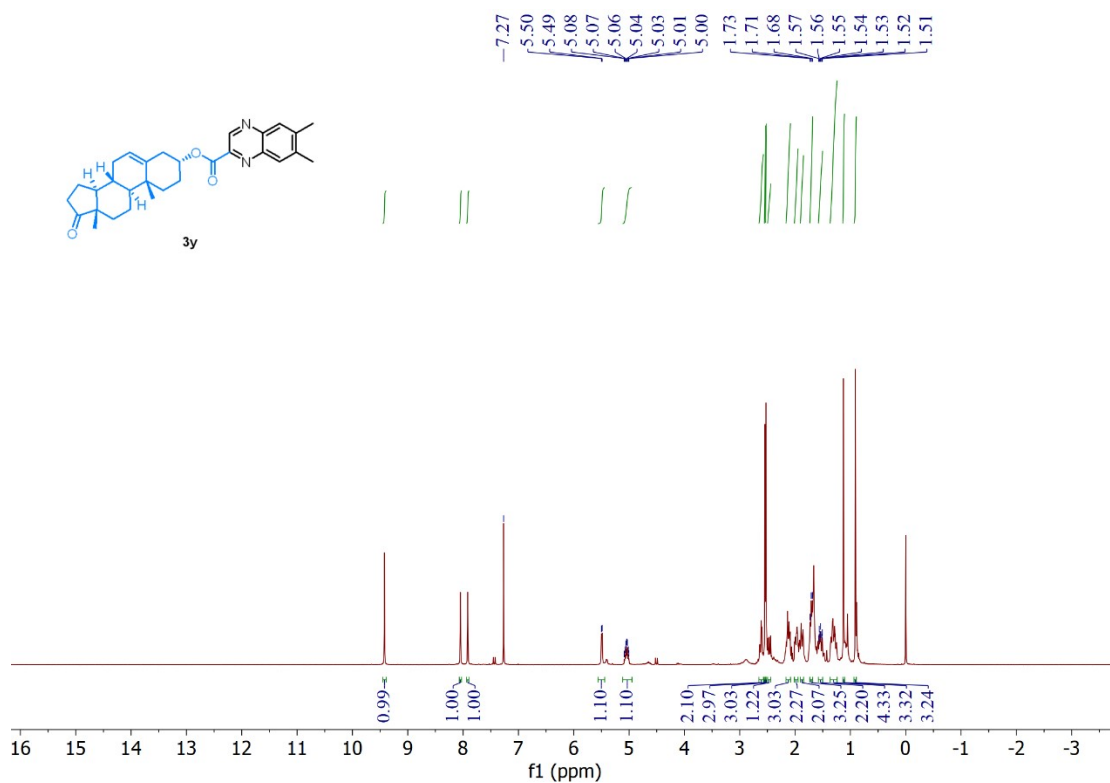

**<sup>1</sup>H NMR Spectrum of Compound 3y (400 MHz, CDCl<sub>3</sub>)**

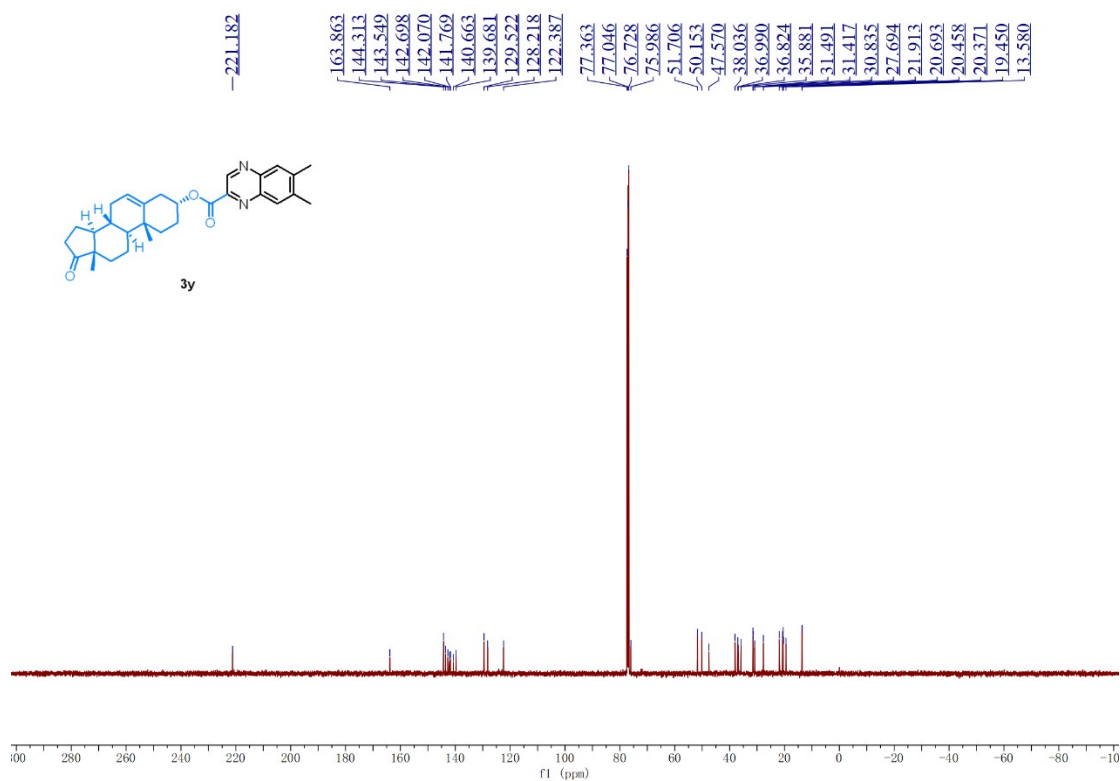

**<sup>13</sup>C {<sup>1</sup>H} NMR Spectrum of Compound 3y (100 MHz, CDCl<sub>3</sub>)**

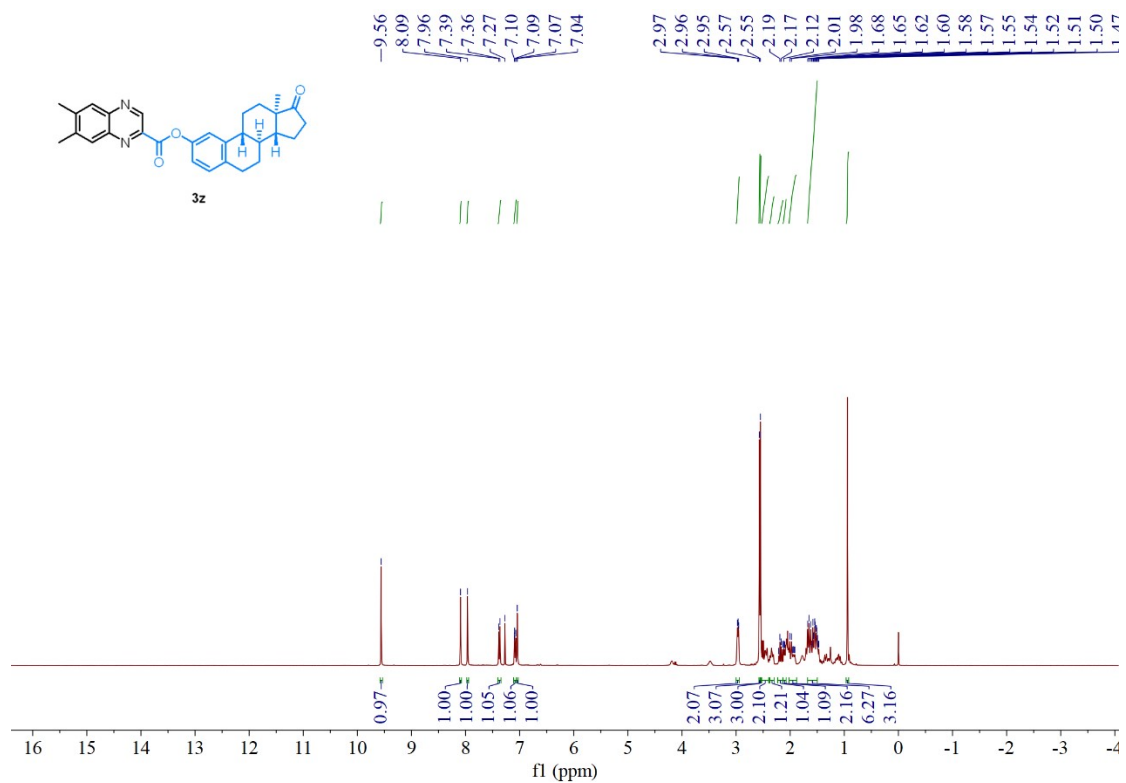

**<sup>1</sup>H NMR Spectrum of Compound 3z (400 MHz, CDCl<sub>3</sub>)**

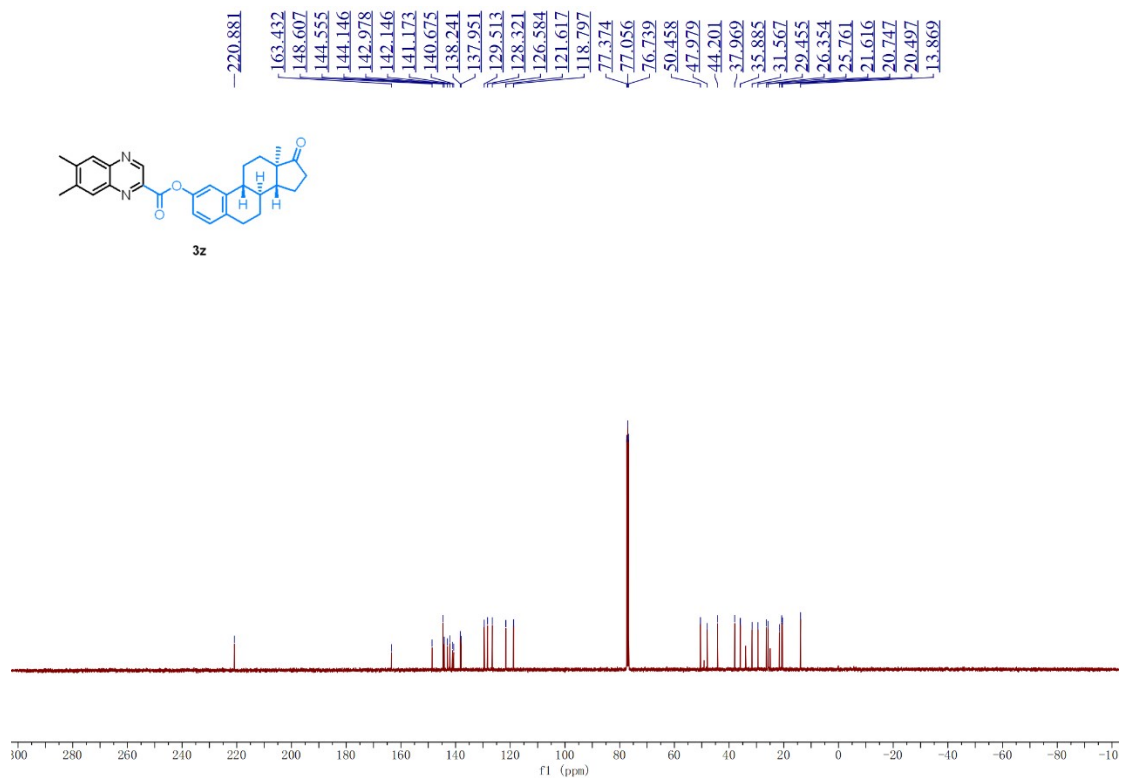

**<sup>13</sup>C {<sup>1</sup>H} NMR Spectrum of Compound 3z (100 MHz, CDCl<sub>3</sub>)**

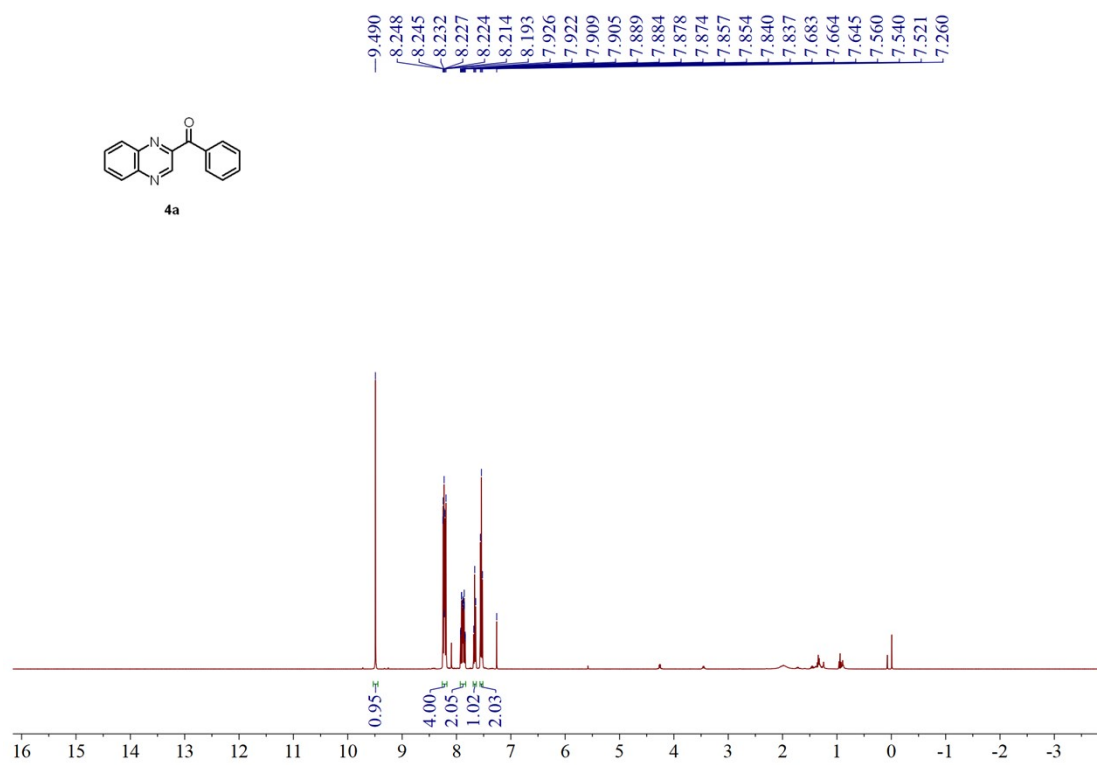

<sup>1</sup>H NMR Spectrum of Compound **4a** (400 MHz, CDCl<sub>3</sub>)

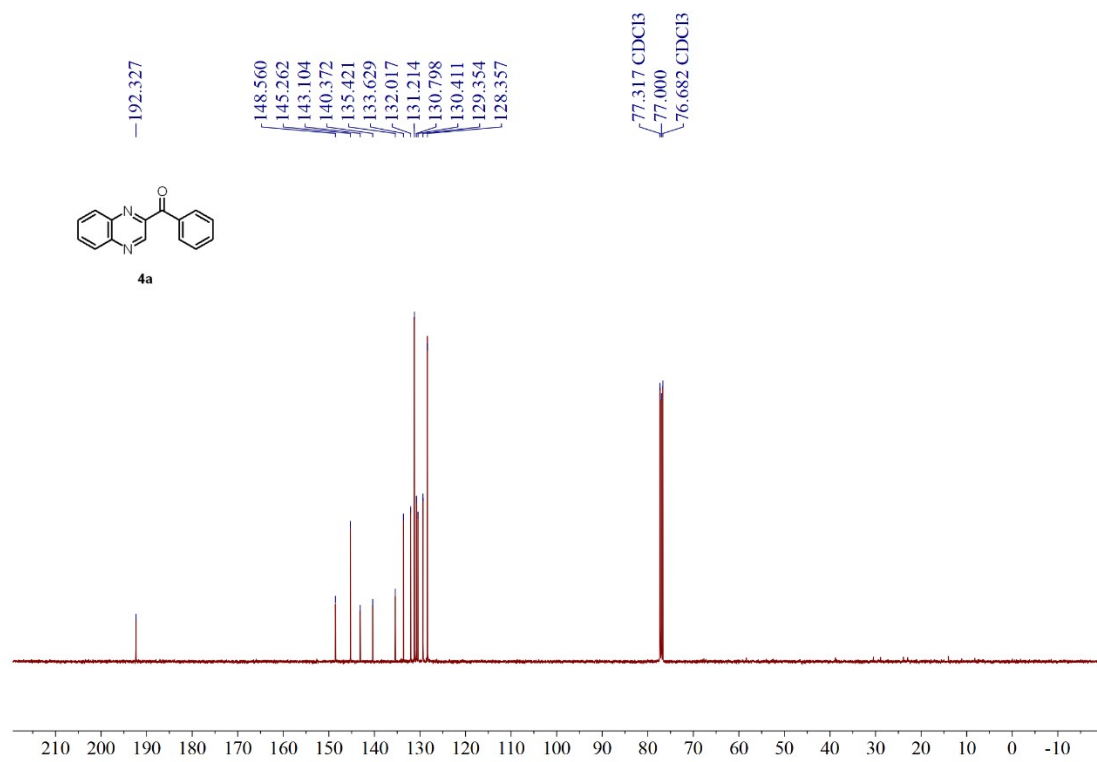

<sup>13</sup>C {<sup>1</sup>H} NMR Spectrum of Compound **4a** (100 MHz, CDCl<sub>3</sub>)

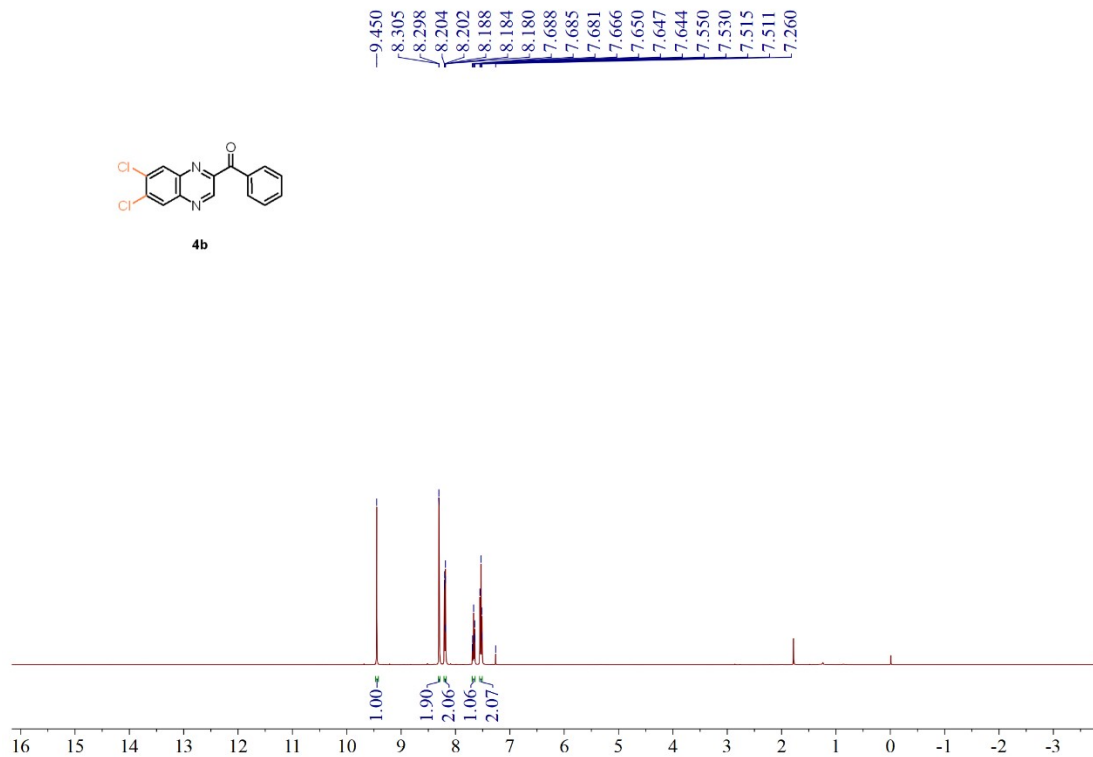

$^1\text{H}$  NMR Spectrum of Compound **4b** (400 MHz,  $\text{CDCl}_3$ )

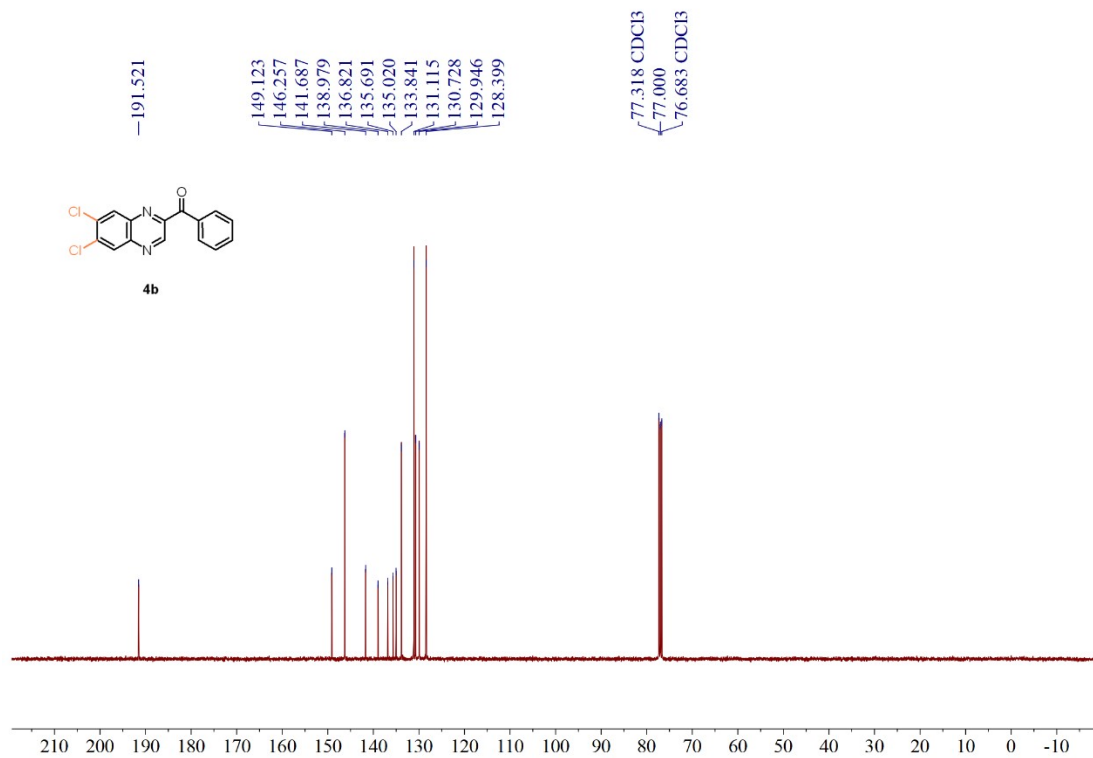

$^{13}\text{C}\{^1\text{H}\}$  NMR Spectrum of Compound **4b** (100 MHz,  $\text{CDCl}_3$ )

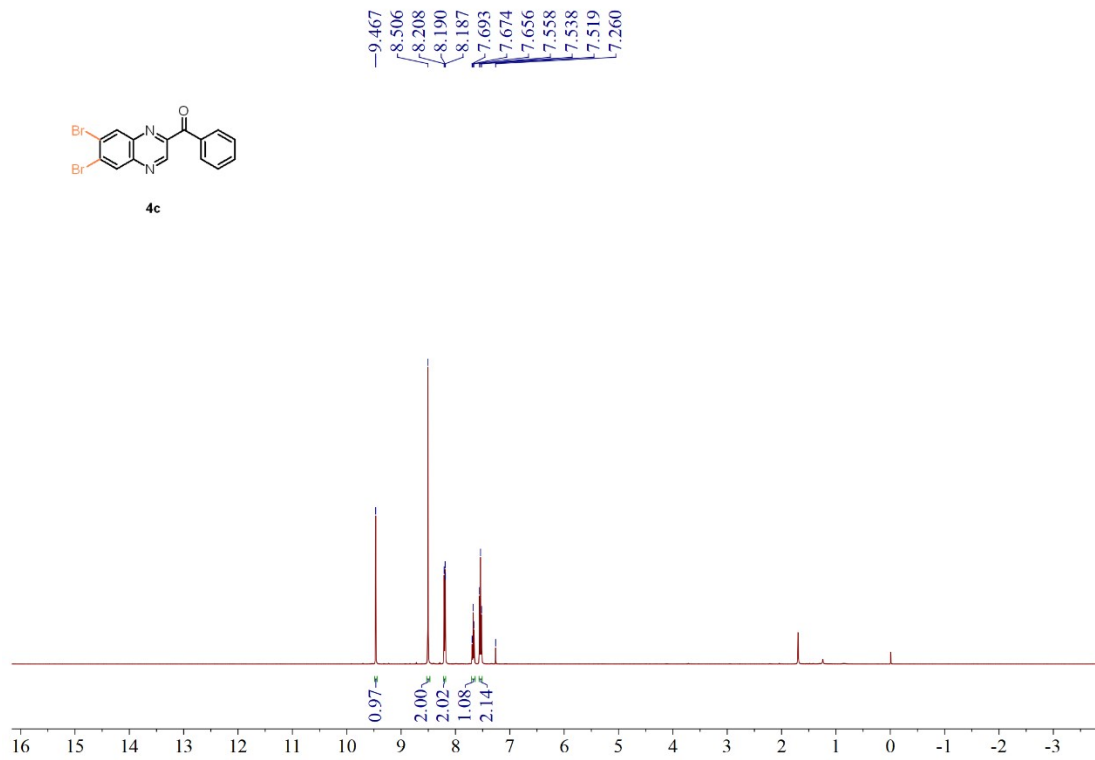

$^1\text{H}$  NMR Spectrum of Compound **4c** (400 MHz,  $\text{CDCl}_3$ )

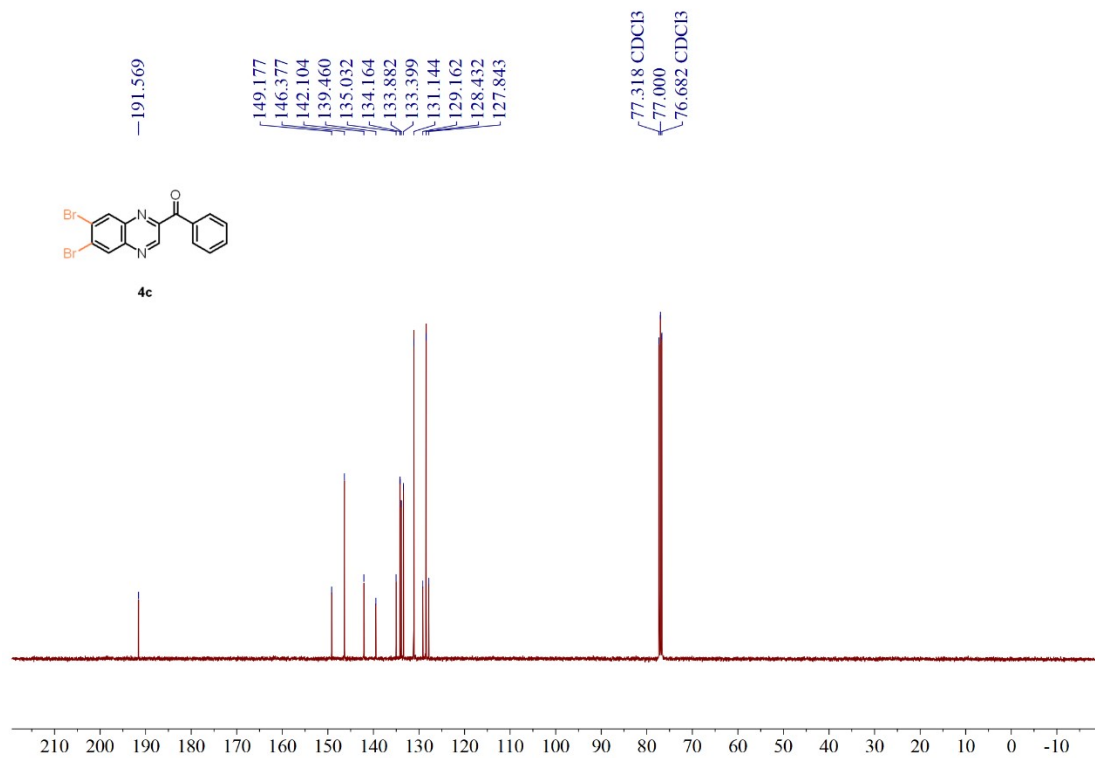

$^{13}\text{C}\{^1\text{H}\}$  NMR Spectrum of Compound **4c** (100 MHz,  $\text{CDCl}_3$ )

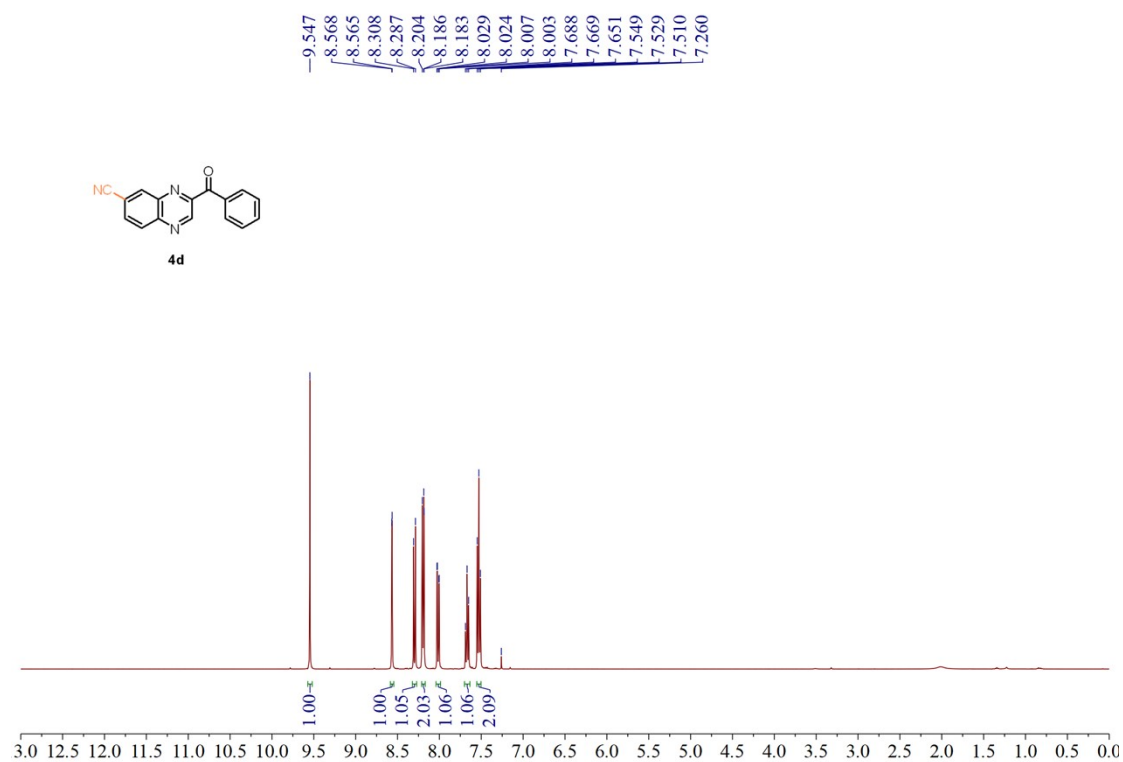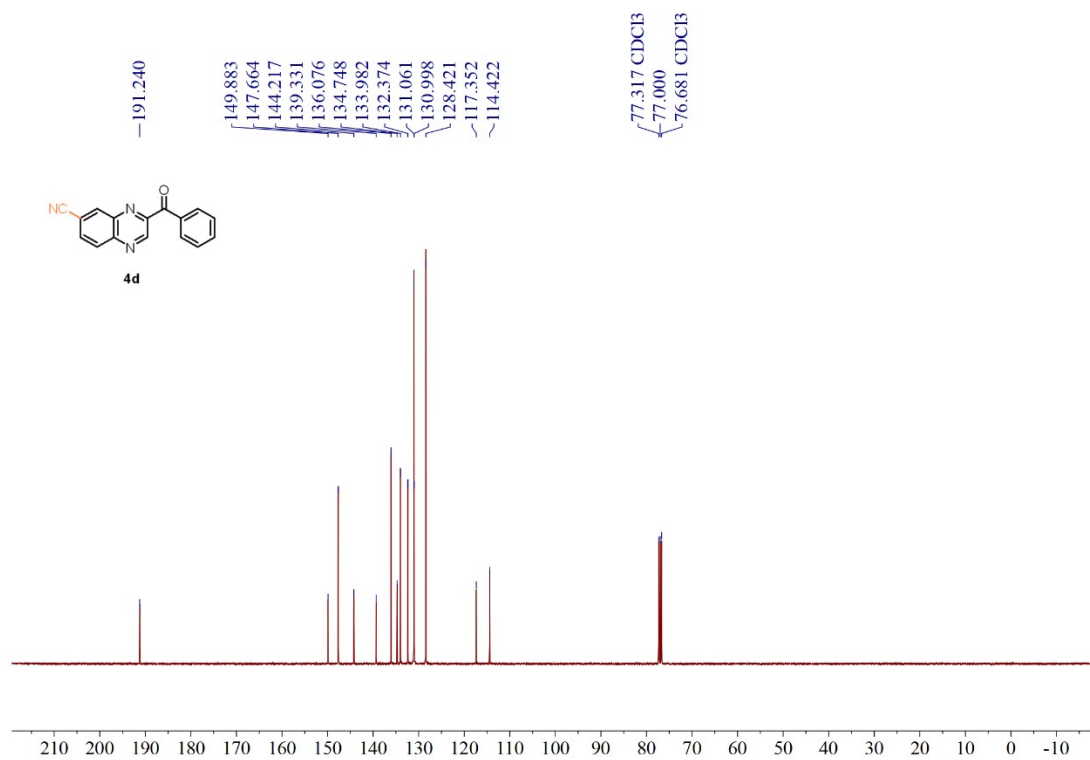



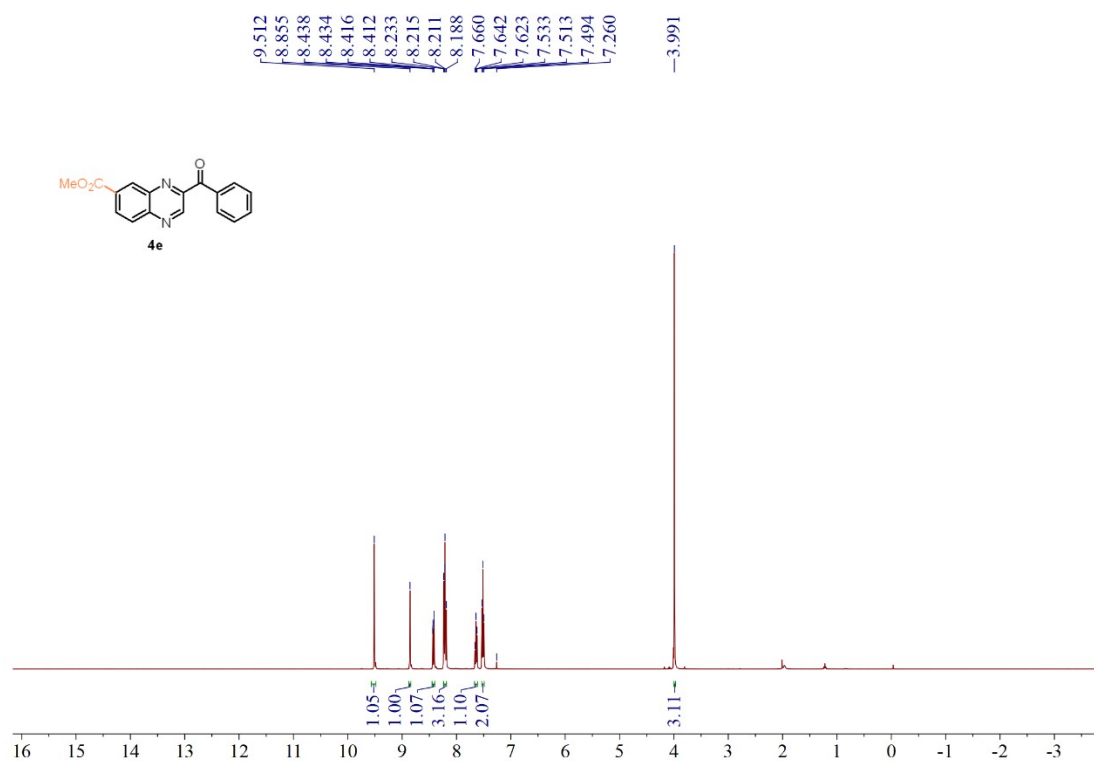

**<sup>1</sup>H NMR Spectrum of Compound 4e (400 MHz, CDCl<sub>3</sub>)**

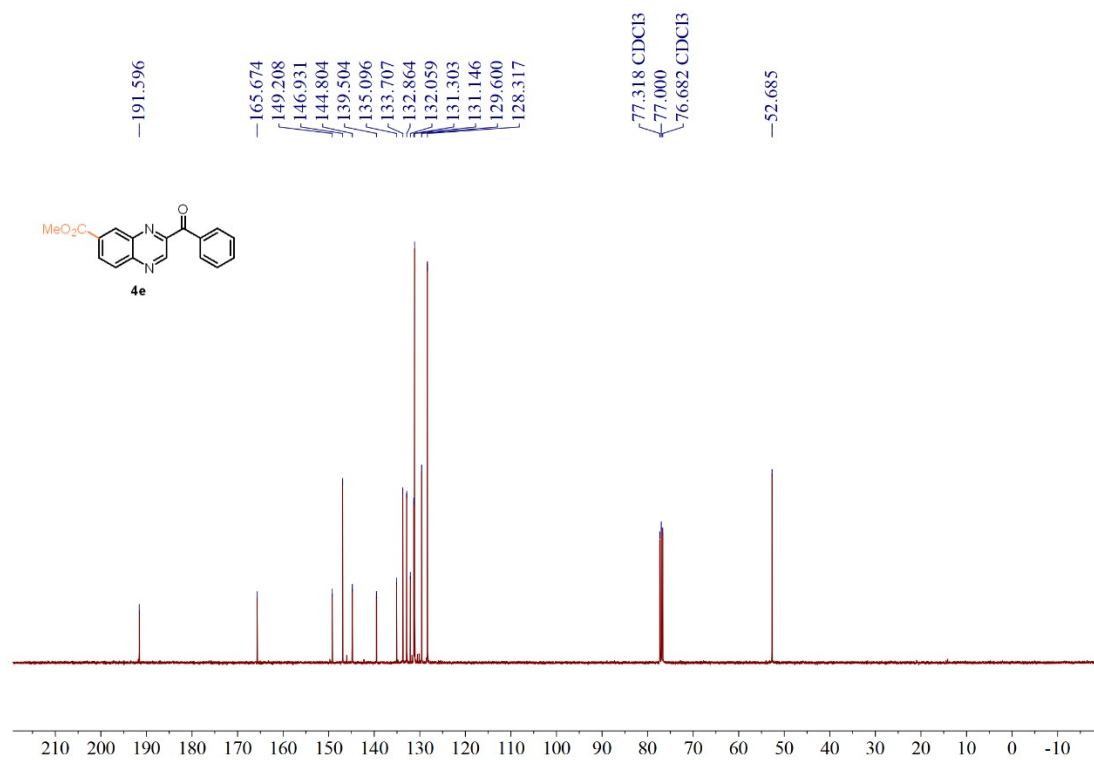

**<sup>13</sup>C {<sup>1</sup>H} NMR Spectrum of Compound 4e (100 MHz, CDCl<sub>3</sub>)**

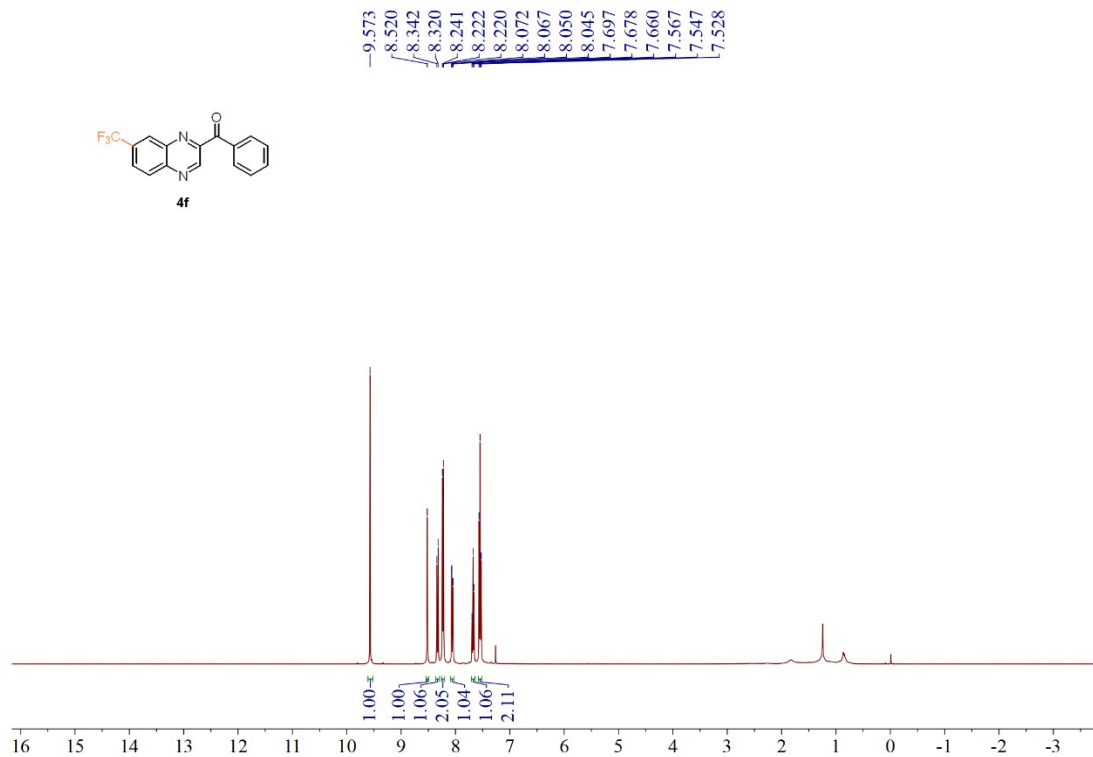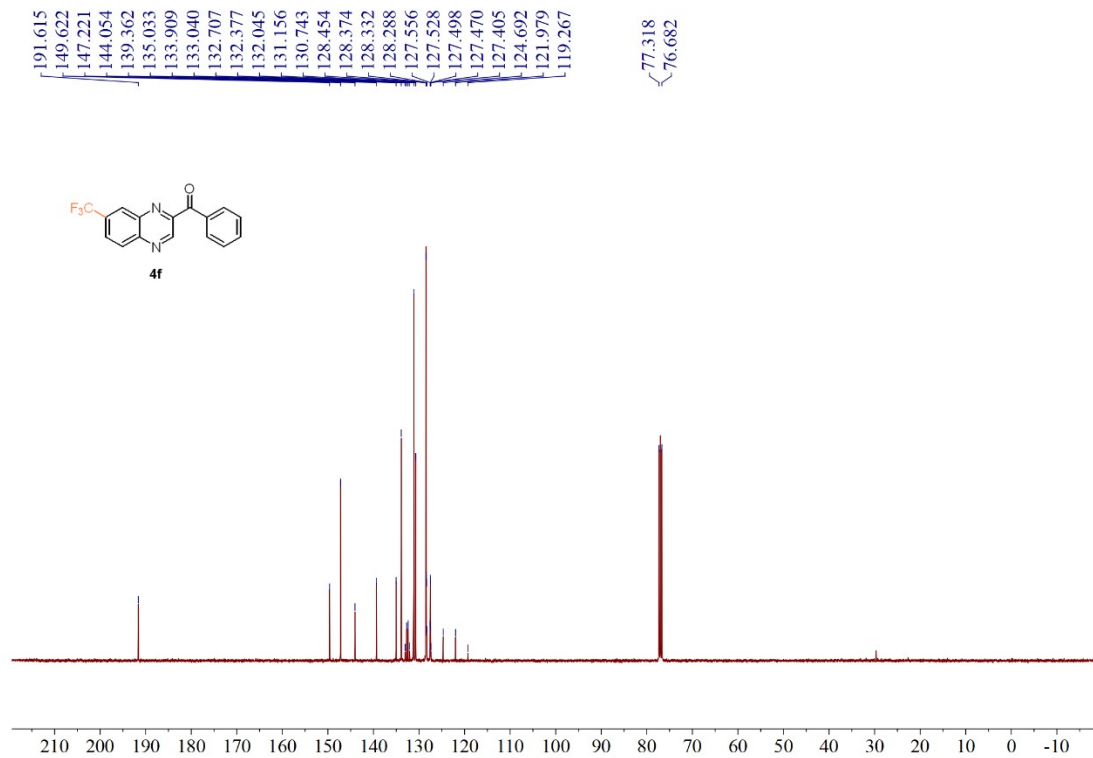

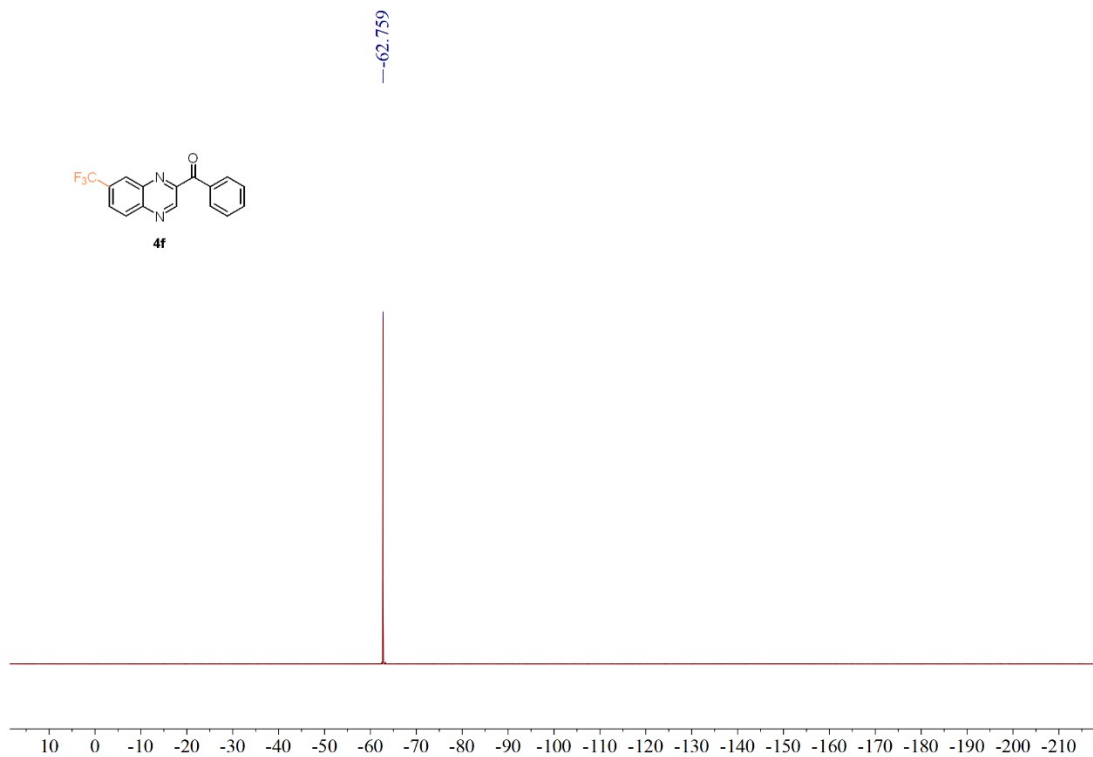

$^{19}\text{F}\{^1\text{H}\}$  NMR Spectrum of Compound **4f** (376 MHz,  $\text{CDCl}_3$ )

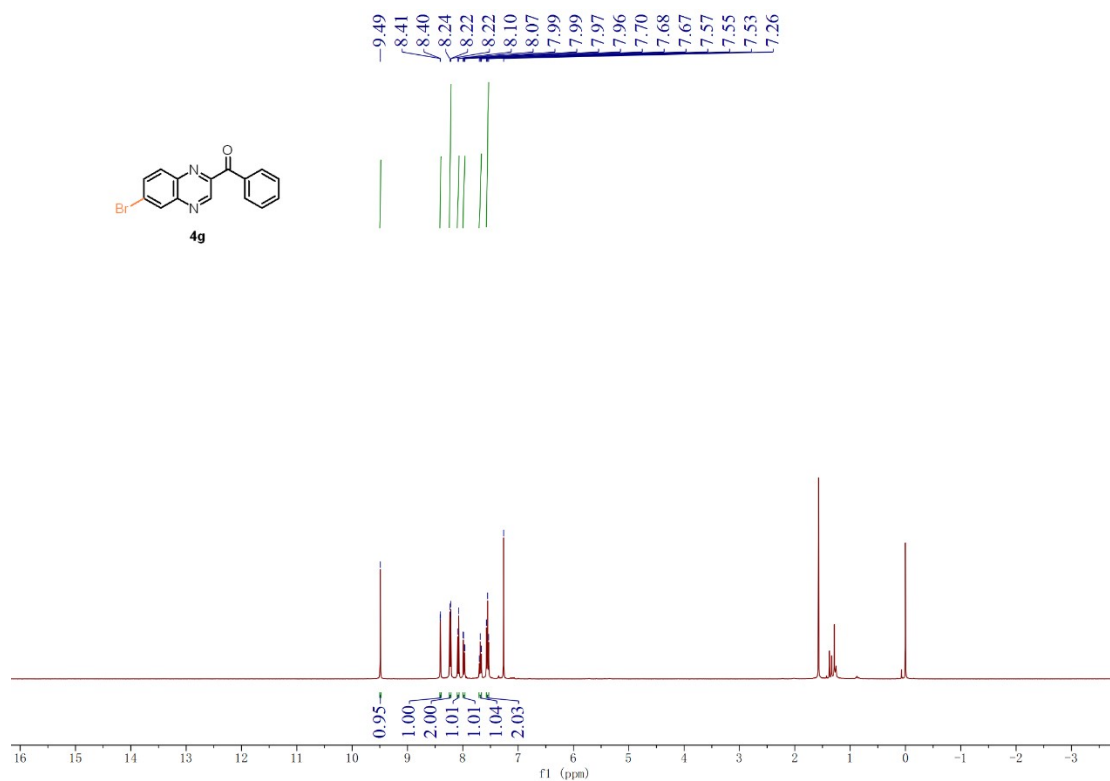

$^1\text{H}$  NMR Spectrum of Compound **4g** (400 MHz,  $\text{CDCl}_3$ )

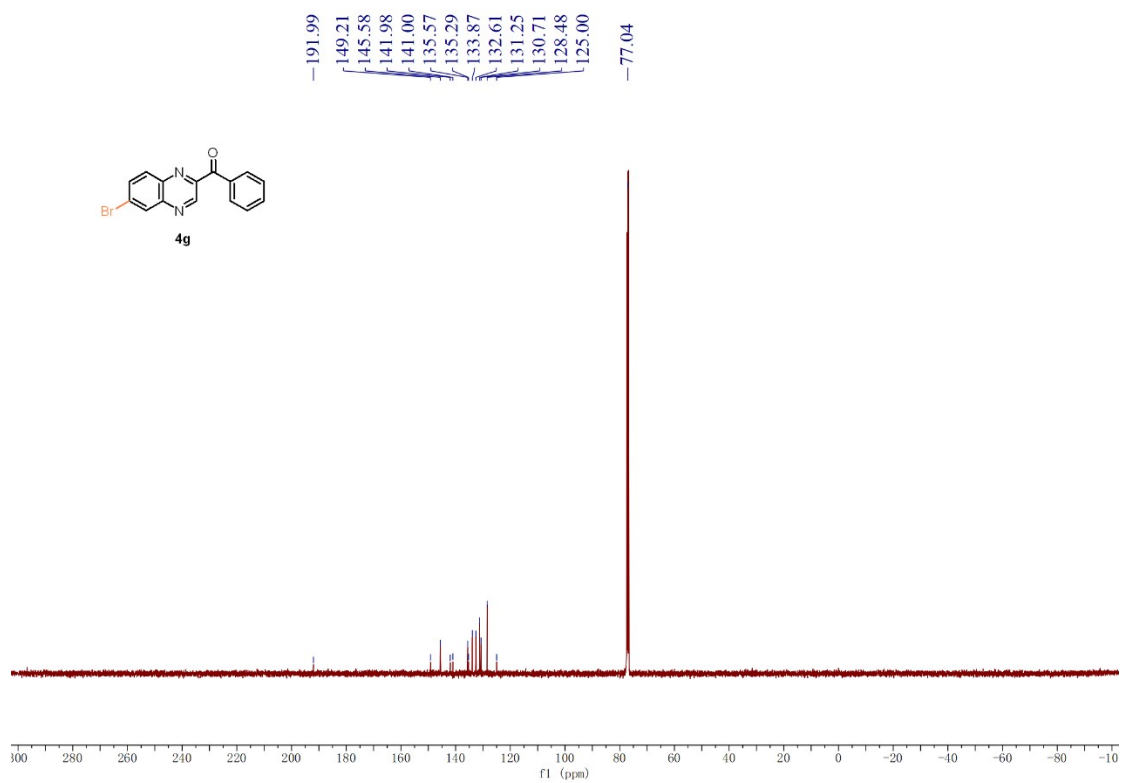

$^{13}\text{C}\{^1\text{H}\}$  NMR Spectrum of Compound **4g** (100 MHz,  $\text{CDCl}_3$ )

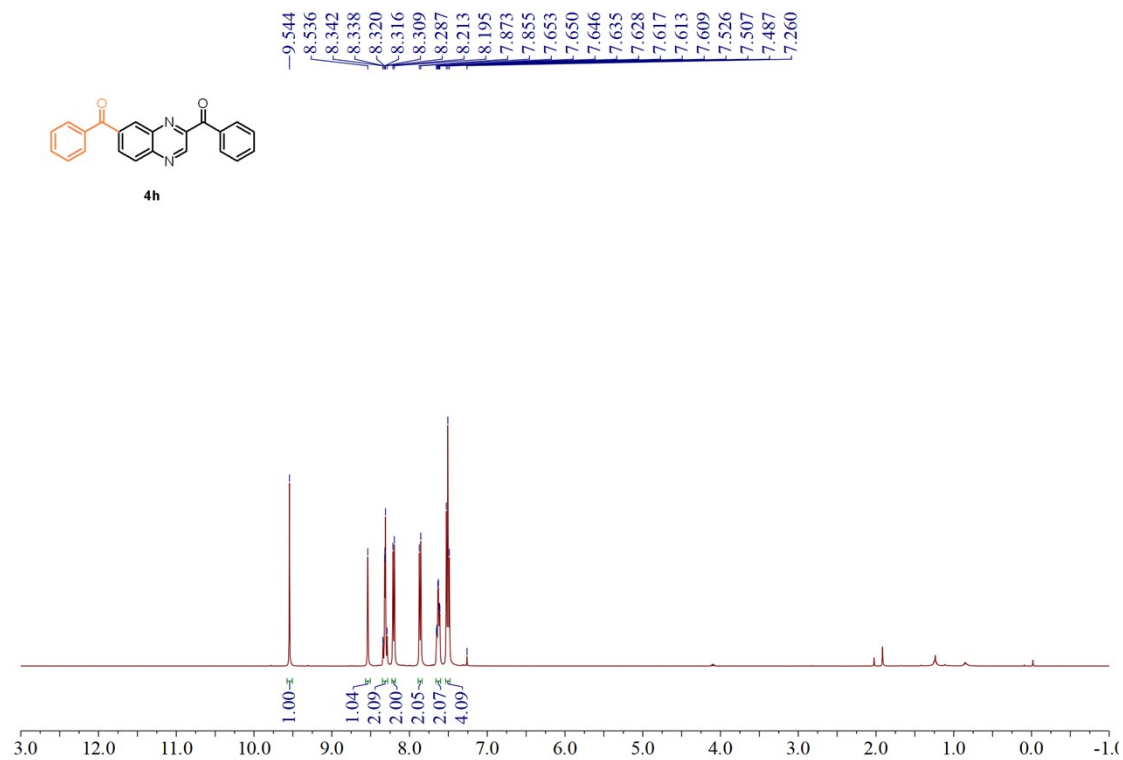

$^1\text{H}$  NMR Spectrum of Compound **4h** (400 MHz,  $\text{CDCl}_3$ )

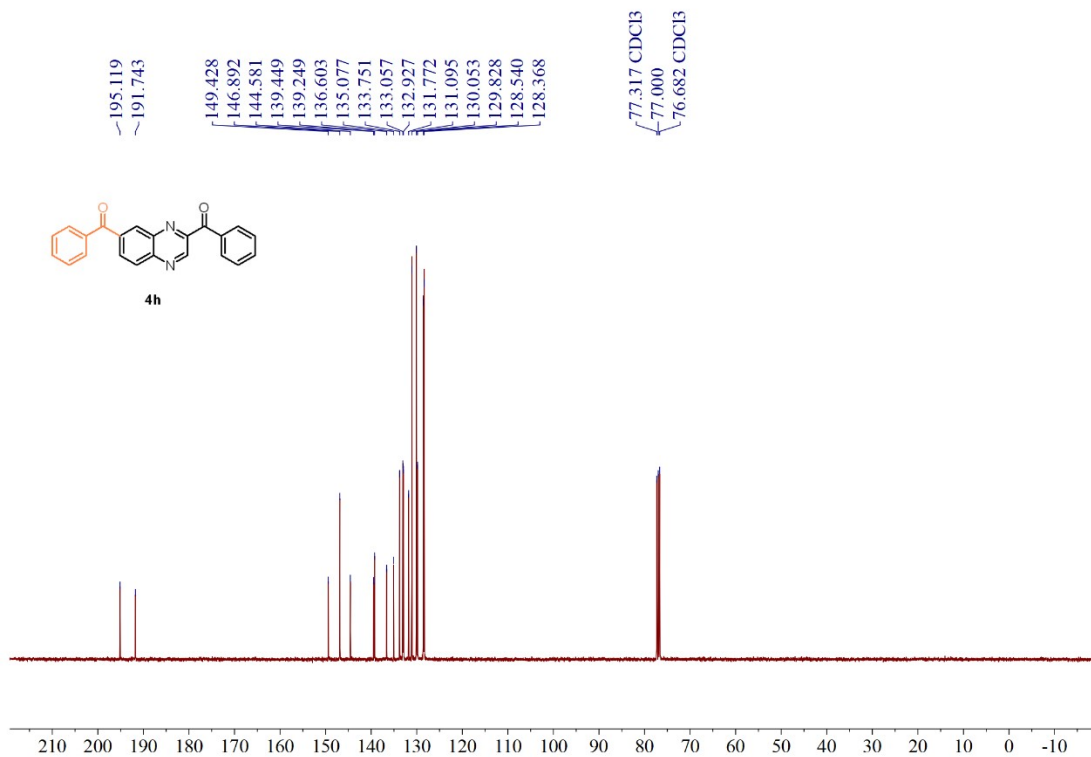

$^{13}\text{C}\{^1\text{H}\}$  NMR Spectrum of Compound **4h** (100 MHz,  $\text{CDCl}_3$ )
